# Supplementary material for: Recyclable organocatalyst-promoted one-pot Michael/aza-Henry/lactamization reactions for fluorinated 2-piperidinones bearing four stereogenic centres
Source: Royal Society of Chemistry journal article supplement (doi:10.1039/c5ra15306a), 2015-01-01
Supplement: c5ra15306a1.pdf [file c5ra15306a1.pdf]

## *Supporting Information*

### **Recyclable Organocatalyst-promoted One-pot Michael/aza-Henry/lactamization Reactions for Fluorinated 2-Piperidinones Bearing Four Stereogenic Centers**

Xin Huang,<sup>a</sup> Kenny Pham,<sup>a</sup> Xiaofeng Zhang,<sup>a</sup> Wen-Bin Yi,<sup>b</sup> Jeremy H. Hyatt,<sup>a</sup> Anthony P. Tran,<sup>a</sup> Jerry P. Jasinski,<sup>c</sup> and Wei Zhang\*<sup>a</sup>

<sup>a</sup> Department of Chemistry, University of Massachusetts Boston, 100 Morrissey Boulevard, Boston, MA 02125, USA

<sup>b</sup> School of Chemical Engineering, Nanjing University of Science and Technology, Nanjing 210094, China

<sup>c</sup> Department of Chemistry, Keene State College, Keene, NH 03435, USA

#### **Contents**

|                                                                                  |     |
|----------------------------------------------------------------------------------|-----|
| 1. General Information .....                                                     | S2  |
| 2. General Procedures .....                                                      | S2  |
| 3. Analytical Data of Products.....                                              | S3  |
| 4. X-ray Report of <b>4c</b> .....                                               | S12 |
| 5. LC-MS, <sup>1</sup> H, <sup>13</sup> C, <sup>19</sup> F NMR of Products ..... | S13 |
| 6. Chiral-LC of Products.....                                                    | S48 |

## 1. General Information

Chemicals and solvents were purchased from commercial suppliers and used as received.  $^1\text{H}$  and  $^{13}\text{C}$  NMR spectra were recorded on a 300 MHz Varian NMR spectrometer. Chemical shifts were reported in parts per million (ppm), and the residual solvent peak was used as an internal reference: proton (chloroform  $\delta$  7.26), carbon (chloroform  $\delta$  77.0). Multiplicity was indicated as follows: s (singlet), d (doublet), t (triplet), q (quartet), m (multiplet), dd (doublet of doublet), br s (broad singlet). Coupling constants were reported in Hertz (Hz). LC-MS were performed on an Agilent 2100 system. A  $\text{C}_{18}$  column (5.0  $\mu\text{m}$ , 6.0 x 50 mm) was used for the separation. The mobile phases were methanol and water both containing 0.05% trifluoro acetic acid. A linear gradient was used to increase from 25:75 v/v methanol/water to 100% methanol over 7.0 min at a flow rate of 0.7 mL/min. UV detections were conducted at 210 nm, 254 nm and 365 nm. Low resolution mass spectra were recorded in APCI (atmospheric pressure chemical ionization). The high resolution mass spectra were obtained on a Finnigan/MAT 95XL-T spectrometer. Sorbent silica gel XHL TLC plates (130815) were used for the thin-layer chromatography (TLC). Flash chromatography separations were performed on YAMAZEN AI-580 flash column system with Agela silica gel columns (230-400 $\mu\text{m}$  mesh). The enantiomeric excesses of products were determined by chiral phase HPLC analysis on a SHIMADZU LC-20AD system with Agela Venusil Chiral OD-H, CA, CJ column and Regis (*R,R*)-Whelk-O1.

## 2. General Procedures for Asymmetric Synthesis of Fluorinated 2-Piperidinones

To a solution of fluorous catalysts **cat-1** (6 mg, 0.01 mmol) in toluene (0.5 mL) was added trans- $\beta$ -Nitrostyrene **6** (0.1 mmol, 1.0 equiv). After being stirred at room temperature for 20 min, fluorinated 1,3-diesters **5** (0.15 mmol, 1.5 equiv) was added. The reaction mixture was stirred for 24 h and then followed by the addition of ethanol (1 mL), benzaldehyde **3** (0.1 mmol, 1.0 equiv),  $\text{NH}_4\text{OAc}$  (0.12 mmol, 1.2 equiv) as well as 2 drops of piperidine. The reaction mixture was stirred for 24 h at 40  $^\circ\text{C}$ . The concentrated reaction mixture was loaded on to a fluorous SPE cartridge and eluted with 80:20 MeOH/ $\text{H}_2\text{O}$ , and then with MeOH. The MeOH fraction was concentrated to recover purified **cat-1**, and the concentrated MeOH/ $\text{H}_2\text{O}$  fraction was purified by YAMAZEN AI-580 flash column system ( $\text{EtOAc}/\text{CH}_2\text{Cl}_2$ ) with Agela silica gel columns.

### 3. Analytical data

#### Ethyl -3-fluoro-5-nitro-2-oxo-4,6-diphenylpiperidine-3-carboxylate (**4a**):

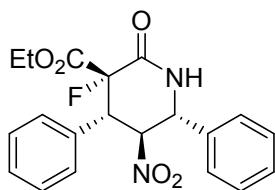

**4a**

Following the general procedure, the title compound **4a** was obtained as a white solid (78% yield, 32 mg, 6:1 dr). The enantiomeric excess was determined by HPLC analysis (Venusil Chiral OD-H, 90:10 hexane/*i*-PrOH, 1.0 mL/min,  $\lambda = 254$  nm):  $t_{\text{minor}} = 28.90$  min,  $t_{\text{major}} = 16.90$  min, 99% ee.  $^1\text{H}$  NMR (300 MHz, DMSO- $d_6$ ):  $\delta$  9.28 (s, 1H), 7.47–7.28 (m, 8H), 7.26–7.11 (m, 2H), 5.53 (d,  $J = 3.7$  Hz, 1H), 5.43 (t,  $J = 3.6$  Hz, 1H), 4.57 (dd,  $J = 33.0, 3.4$  Hz, 1H), 4.19 (q,  $J = 7.1$  Hz, 2H), 1.11 (t,  $J = 7.1$  Hz, 3H);  $^{13}\text{C}$  NMR (75 MHz, DMSO- $d_6$ ):  $\delta$  14.3, 50.0, 50.2, 60.1, 62.7, 87.4, 91.2, 93.2, 128.1, 129.1, 129.4, 129.4, 129.4, 129.7, 129.9, 131.1, 136.4, 162.4, 162.6, 165.1;  $^{19}\text{F}$  (282 MHz, DMSO- $d_6$ ):  $\delta$  -162.9. MS (APCI)  $m/z$ : 387.1 (M+1); HRMS (ESI): calcd. for  $\text{C}_{20}\text{H}_{19}\text{FN}_2\text{O}_5[\text{M}+\text{Na}]^+$  409.1176; found 409.1170.

#### Ethyl 3-fluoro-6-(4-fluorophenyl)-5-nitro-2-oxo-4-phenylpiperidine-3-carboxylate (**4b**):

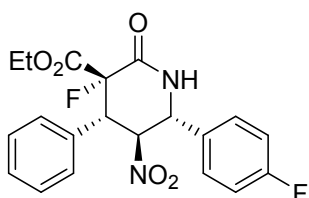

**4b**

Following the general procedure, the title compound **4b** was obtained as a white solid (85% yield, 34 mg, 8:1 dr). The enantiomeric excess was determined by HPLC analysis (Venusil Chiral OD-H, 80:20 hexane/*i*-PrOH, 1.0 mL/min,  $\lambda = 254$  nm):  $t_{\text{minor}} = 11.66$  min,  $t_{\text{major}} = 8.50$  min, 98% ee.  $^1\text{H}$  NMR (300 MHz,  $\text{CDCl}_3$ ):  $\delta$  7.48–7.19 (m, 7H), 7.13 (d,  $J = 4.6$  Hz, 2H), 6.10 (s, 1H), 5.35 (t,  $J = 9.1$  Hz, 1H), 5.21 (d,  $J = 9.9$  Hz, 1H), 4.39 (dd,  $J = 30.6, 12.3$  Hz, 1H), 4.22 (q,  $J = 7.2$  Hz, 2H), 1.15 (t,  $J = 7.1$  Hz, 3H);  $^{13}\text{C}$  NMR (75 MHz,  $\text{CDCl}_3$ ):  $\delta$  13.9, 50.2, 50.4, 59.9, 63.0, 87.7, 116.8, 117.0, 128.8, 128.9, 129.0, 129.2, 129.6, 216.0;  $^{19}\text{F}$  NMR (282 MHz,  $\text{CDCl}_3$ ):  $\delta$  -110.2, -162.8. MS (APCI)  $m/z$ : 405.1 (M+1); HRMS (EI): calcd. for  $\text{C}_{20}\text{H}_{18}\text{F}_2\text{N}_2\text{O}_5$  404.1184; found 404.1183.

**Ethyl 6-(4-bromophenyl)-3-fluoro-5-nitro-2-oxo-4-phenylpiperidine-3-carboxylate (4c):**

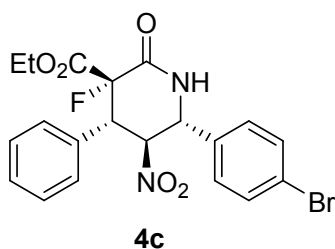

Following the general procedure, the title compound **4c** was obtained as a white solid (87% yield, 40 mg, 10:1 dr). The enantiomeric excess was determined by HPLC analysis (Venusil Chiral OD-H, 90:10 hexane/*i*-PrOH, 1.0 mL/min,  $\lambda = 254$  nm):  $t_{\text{minor}} = 25.62$  min,  $t_{\text{major}} = 19.97$  min, 96% ee.  $^1\text{H}$  NMR (300 MHz,  $\text{CDCl}_3$ ):  $\delta$  7.59 (d,  $J = 11.1$  Hz, 2H), 7.38–7.04 (m, 7H), 6.46 (s, 1H), 5.35 (t,  $J = 9.1$  Hz, 1H), 5.17 (d,  $J = 9.9$  Hz, 2H), 4.37 (dd,  $J = 30.7, 12.4$  Hz, 1H), 4.19 (q,  $J = 7.1$  Hz, 2H), 1.13 (t,  $J = 7.1$  Hz, 3H);  $^{13}\text{C}$  NMR (75 MHz,  $\text{CDCl}_3$ ):  $\delta$  13.8, 49.9, 50.4, 59.9, 63.0, 87.7, 124.8, 128.5, 129.0, 129.6, 132.9, 134.0, 162.6, 164.4, 178.4, 216.0;  $^{19}\text{F}$  NMR (282 MHz,  $\text{CDCl}_3$ ):  $\delta$  -162.8. MS (APCI)  $m/z$ : 465.1 (M+1); HRMS (ESI): calcd. for  $\text{C}_{20}\text{H}_{18}\text{BrFN}_2\text{O}_5[\text{M}+\text{Na}]^+$  487.0281; found 487.0293.

**Ethyl 3-fluoro-5-nitro-6-(4-nitrophenyl)-2-oxo-4-phenylpiperidine-3-carboxylate (4d):**

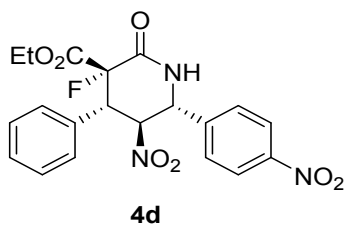

Following the general procedure, the title compound **4d** was obtained as a white solid (83% yield, 35 mg, 10:1 dr). The enantiomeric excess was determined by HPLC analysis (Venusil Chiral OD-H, 90:10 hexane/*i*-PrOH, 1.0 mL/min,  $\lambda = 254$  nm):  $t_{\text{minor}} = 97.22$  min,  $t_{\text{major}} = 67.28$  min, 96% ee.  $^1\text{H}$  NMR (300 MHz,  $\text{CDCl}_3$ ):  $\delta$  8.31 (d,  $J = 8.8$  Hz, 2H), 7.58 (d,  $J = 8.8$  Hz, 2H), 7.45–7.04 (m, 5H), 6.76 (s, 1H), 5.45–5.15 (m, 2H), 4.59–4.26 (m, 1H), 4.18 (q,  $J = 7.2$  Hz, 2H), 1.11 (t,  $J = 7.1$  Hz, 3H);  $^{13}\text{C}$  NMR (75 MHz,  $\text{CDCl}_3$ ):  $\delta$  216.0, 201.7, 141.9, 129.8, 129.1, 128.1, 125.0, 87.7, 63.2, 60.0, 50.3, 50.1, 14.0;  $^{19}\text{F}$  NMR (282 MHz,  $\text{CDCl}_3$ ):  $\delta$  -163.1. MS (APCI)  $m/z$ : 432.1 (M+1); HRMS (EI): calcd. for  $\text{C}_{20}\text{H}_{18}\text{FN}_3\text{O}_7$  431.1129; found 431.1125.

**Ethyl 3-fluoro-5-nitro-2-oxo-4-phenyl-6-(4-(trifluoromethyl)phenyl)piperidine-3-carboxylate (4e):**

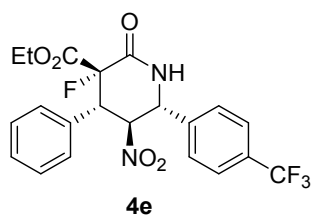

Following the general procedure, the title compound **4e** was obtained as a white solid (85% yield, 38 mg, 15:1 dr). The enantiomeric excess was determined by HPLC analysis (Venusil Chiral OD-H, 90:10 hexane/*i*-PrOH, 1.0 mL/min,  $\lambda = 254$  nm):  $t_{\text{minor}} = 26.56$  min,  $t_{\text{major}} = 12.73$  min, 97% ee.  $^1\text{H}$  NMR (300 MHz,  $\text{CDCl}_3$ ):  $\delta$  7.71 (d,  $J = 8.4$  Hz, 2H), 7.50 (d,  $J = 8.1$  Hz, 2H), 7.40–7.10 (m, 5H), 5.44–5.11 (m, 2H), 4.40 (dd,  $J = 30.7, 11.7$  Hz, 1H), 4.18 (q,  $J = 7.2$  Hz, 2H), 1.11 (t,  $J = 7.1$  Hz, 3H);  $^{13}\text{C}$  NMR (75 MHz,  $\text{CDCl}_3$ ):  $\delta$  164.6, 164.3, 163.1, 162.8, 129.7, 129.4, 129.1, 129.1, 129.1, 127.4, 126.7, 126.7, 88.1, 63.3, 60.3, 50.3, 50.1, 13.8;  $^{19}\text{F}$  NMR (282 MHz,  $\text{CDCl}_3$ ):  $\delta$  -63.8, -163.3. MS (APCI)  $m/z$  455.1 (M+1); HRMS (EI): calcd. for  $\text{C}_{21}\text{H}_{18}\text{F}_4\text{N}_2\text{O}_5$  454.1152; found 454.1147.

**Ethyl 6-(4-(tert-butyl)phenyl)-3-fluoro-5-nitro-2-oxo-4-phenylpiperidine-3-carboxylate (4f):**

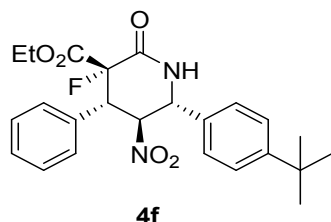

Following the general procedure, the title compound **4f** was obtained as a white solid (35% yield, 15 mg, 4:1 dr). The enantiomeric excess was determined by HPLC analysis (Venusil Chiral OD-H, 90:10 hexane/*i*-PrOH, 1.0 mL/min,  $\lambda = 254$  nm):  $t_{\text{minor}} = 19.42$  min,  $t_{\text{major}} = 13.77$  min, 97% ee.  $^1\text{H}$  NMR (300 MHz,  $\text{CDCl}_3$ ):  $\delta$  7.44 (d,  $J = 8.3$  Hz, 2H), 7.34–7.06 (m, 7H), 6.91 (s, 1H), 5.80 (dd,  $J = 12.3, 6.2$  Hz, 1H), 5.48–5.18 (m, 1H), 4.42 (dd,  $J = 30.9, 12.3$  Hz, 1H), 4.25 (q,  $J = 7.1$  Hz, 2H), 1.31 (s, 9H), 1.20 (t,  $J = 7.1$  Hz, 3H);  $^{13}\text{C}$  NMR (75 MHz,  $\text{CDCl}_3$ ):  $\delta$  164.9, 163.5, 153.1, 131.1, 130.3, 128.9, 128.6, 128.6, 127.0, 126.5, 126.2, 125.9, 83.7, 63.0, 57.0, 44.8, 44.5, 34.7, 31.2, 13.9;  $^{19}\text{F}$  NMR (282 MHz,  $\text{CDCl}_3$ ):  $\delta$  -63.8, -163.5. MS (APCI)  $m/z$ : 443.1 (M+1); HRMS (EI): calcd. for  $\text{C}_{24}\text{H}_{27}\text{FN}_2\text{O}_5$  442.1904; found 442.1903.

**Ethyl 3-fluoro-6-(4-methoxyphenyl)-5-nitro-2-oxo-4-phenylpiperidine-3-carboxylate (4g):**

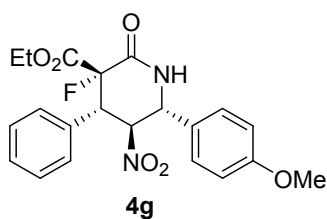

Following the general procedure, the title compound **4g** was obtained as a white solid (30% yield, 12 mg, 4:1 dr). The enantiomeric excess was determined by HPLC analysis (Venusil Chiral OD-H, 85:15 hexane/*i*-PrOH, 1.0 mL/min,  $\lambda = 254$  nm):  $t_{\text{minor}} = 52.40$  min,  $t_{\text{major}} = 25.26$  min, 95% ee.  $^1\text{H}$  NMR (300 MHz,  $\text{CDCl}_3$ ):  $\delta$  7.37–7.21 (m, 7H), 6.95 (d,  $J = 8.7$  Hz, 2H), 6.00 (s, 1H), 5.35 (t,  $J = 9.1$  Hz, 1H), 5.16 (d,  $J = 10.1$  Hz, 1H), 4.38 (dd,  $J = 30.7, 12.4$  Hz, 1H), 4.23 (q,  $J = 7.2$  Hz, 2H), 3.83 (s, 3H), 1.16 (t,  $J = 7.1$  Hz, 3H);  $^{13}\text{C}$  NMR (75 MHz,  $\text{CDCl}_3$ ):  $\delta$  201.7, 129.5, 129.2, 129.0, 128.2, 118.7, 114.5, 63.2, 60.6, 55.1, 50.3, 13.8, 8.0;  $^{19}\text{F}$  NMR (282 MHz,  $\text{CDCl}_3$ ):  $\delta$  -163.1. MS (APCI)  $m/z$ : 417.1 (M+1); HRMS (ESI): calcd. for  $\text{C}_{21}\text{H}_{21}\text{FN}_2\text{O}_6$  [M+H] $^+$  417.1462; found 417.1463.

**Ethyl 6-(2,3-dichlorophenyl)-3-fluoro-5-nitro-2-oxo-4-phenylpiperidine-3-carboxylate (4h):**

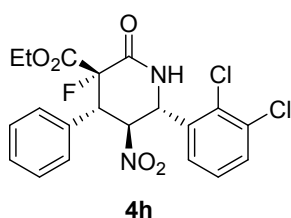

Following the general procedure, the title compound **4h** was obtained as a colorless oil (55% yield, 25 mg, 3.5:1 dr). The enantiomeric excess was determined by HPLC analysis (Venusil Chiral CJ, 80:20 hexane/*i*-PrOH, 1.0 mL/min,  $\lambda = 254$  nm):  $t_{\text{minor}} = 13.33$  min,  $t_{\text{major}} = 11.44$  min, 97% ee.  $^1\text{H}$  NMR (300 MHz,  $\text{CDCl}_3$ ):  $\delta$  7.57 (dd,  $J = 7.8, 1.7$  Hz, 1H), 7.49–7.15 (m, 7H), 6.30 (s, 1H), 5.84 (d,  $J = 10.0$  Hz, 1H), 5.70–5.46 (m, 1H), 4.42 (dd,  $J = 31.0, 12.4$  Hz, 1H), 4.20 (q,  $J = 7.1$  Hz, 2H), 1.14 (t,  $J = 7.1$  Hz, 3H);  $^{13}\text{C}$  NMR (75 MHz,  $\text{CDCl}_3$ ):  $\delta$  216.2, 201.5, 132.5, 129.8, 129.3, 129.3, 129.2, 128.7, 86.0, 63.2, 57.6, 50.3, 50.1, 14.0;  $^{19}\text{F}$  NMR (282 MHz,  $\text{CDCl}_3$ ):  $\delta$  -164.1. MS (APCI)  $m/z$ : 455.1 (M+1); HRMS (ESI): calcd. for  $\text{C}_{20}\text{H}_{17}\text{Cl}_2\text{FN}_2\text{O}_5$  [M+H] $^+$  455.0577; found 455.0573.

**Ethyl 3-fluoro-6-(3-fluoro-4-methoxyphenyl)-5-nitro-2-oxo-4-phenylpiperidine-3-carboxylate (4i):**

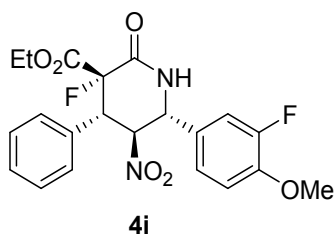

Following the general procedure, the title compound **4i** was obtained as a white solid (62% yield, 27 mg, 2:1 dr). The enantiomeric excess was determined by HPLC analysis (Venusil Chiral OD-H, 95:5 hexane/*i*-PrOH, 1.0 mL/min,  $\lambda = 254$  nm):  $t_{\text{minor}} = 25.02$  min,  $t_{\text{major}} = 6.36$  min, 93% ee.  $^1\text{H}$  NMR (300 MHz,  $\text{CDCl}_3$ ):  $\delta$  7.46–7.22 (m, 5H), 7.11 (dd,  $J = 10.7, 8.3$  Hz, 1H), 7.02–6.74 (m, 2H), 5.45–5.22 (m, 1H), 5.17 (dd,  $J = 9.9, 2.7$  Hz, 1H), 4.37 (dd,  $J = 30.8, 12.4$  Hz, 1H), 4.19 (q,  $J = 7.1$  Hz, 2H), 3.92 (s, 3H), 1.13 (t,  $J = 7.1$  Hz, 3H);  $^{13}\text{C}$  NMR (75 MHz,  $\text{CDCl}_3$ ):  $\delta$  164.6, 163.1, 155.2, 152.2, 129.6, 129.5, 129.1, 129.0, 128.6, 119.6, 119.5, 117.1, 116.9, 111.4, 87.7, 63.0, 60.4, 56.4, 50.4, 50.2, 13.9;  $^{19}\text{F}$  NMR (282 MHz,  $\text{CDCl}_3$ ):  $\delta$  -131.9, -132.7, -162.6, -164.7. MS (APCI)  $m/z$ : 435.1 (M+1); HRMS (ESI): calcd. for  $\text{C}_{21}\text{H}_{20}\text{F}_2\text{N}_2\text{O}_6$  [M+H] $^+$  435.1368; found 435.1363.

**Ethyl 4-(3-chlorophenyl)-3-fluoro-5-nitro-2-oxo-6-phenylpiperidine-3-carboxylate (4j):**

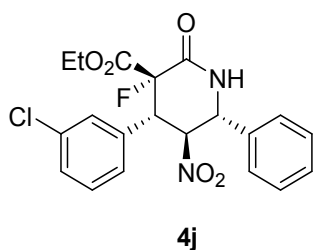

Following the general procedure, the title compound **4j** was obtained as a white solid (65% yield, 27 mg, 3:1 dr). The enantiomeric excess was determined by HPLC analysis (Venusil Chiral CA, 90:10 hexane/*i*-PrOH, 1.0 mL/min,  $\lambda = 254$  nm):  $t_{\text{minor}} = 7.24$  min,  $t_{\text{major}} = 10.32$  min, 90% ee.  $^1\text{H}$  NMR (300 MHz,  $\text{CDCl}_3$ ):  $\delta$  7.50–7.40 (m, 3H), 7.33 (dd,  $J = 6.7, 2.8$  Hz, 2H), 7.29–7.23 (m, 2H), 7.23–7.16 (m, 1H), 7.14–7.06 (m, 1H), 6.55 (s, 1H), 5.79 (dd,  $J = 12.3, 6.2$  Hz, 1H), 5.43 (d, 1H), 4.59–4.14 (m, 3H), 1.25 (t,  $J = 7.1$  Hz, 3H);  $^{13}\text{C}$  NMR (75 MHz,  $\text{CDCl}_3$ ):  $\delta$  134.9, 133.2, 130.5, 130.2, 123.0, 129.5, 129.4, 129.3, 128.9, 127.7, 127.2, 126.7, 126.7, 83.5, 63.3, 57.3, 44.5, 44.3, 14.0;  $^{19}\text{F}$  NMR (282 MHz,  $\text{CDCl}_3$ ):  $\delta$  -163.2. MS (APCI)  $m/z$ : 421.1 (M+1); HRMS (ESI): calcd. for  $\text{C}_{20}\text{H}_{18}\text{ClFN}_2\text{O}_5$  [M+H] $^+$  421.0967; found 421.0970.

**Ethyl 4-(4-bromophenyl)-3-fluoro-5-nitro-2-oxo-6-phenylpiperidine-3-carboxylate (4k):**

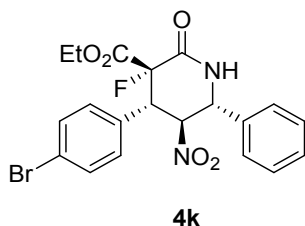

Following the general procedure, the title compound **4k** was obtained as a white solid (68% yield, 32 mg, 3.5:1 dr). The enantiomeric excess was determined by HPLC analysis (Venusil Chiral OD-H, 80:20 hexane/*i*-PrOH, 0.6 mL/min,  $\lambda = 254$  nm):  $t_{\text{minor}} = 22.54$  min,  $t_{\text{major}} = 13.57$  min, 93% ee.  $^1\text{H}$  NMR (300 MHz,  $\text{CDCl}_3$ ):  $\delta$  7.45 (dd,  $J = 8.5, 5.5$  Hz, 5H), 7.32 (dd,  $J = 6.7, 2.6$  Hz, 2H), 7.08 (d,  $J = 8.3$  Hz, 2H), 6.78 (s, 1H), 5.77 (dd,  $J = 12.4, 6.3$  Hz, 1H), 5.41 (d,  $J = 6.5$  Hz, 1H), 4.54–4.08 (m, 3H), 1.24 (t,  $J = 7.1$  Hz, 3H);  $^{13}\text{C}$  NMR (75 MHz,  $\text{CDCl}_3$ ):  $\delta$  134.3, 133.1, 132.6, 129.8, 129.6, 129.3, 129.2, 128.7, 124.8, 87.9, 63.2, 60.4, 50.6, 50.3, 14.1;  $^{19}\text{F}$  NMR (282 MHz,  $\text{CDCl}_3$ ):  $\delta$  -164.8. MS (APCI)  $m/z$ : 465.1 (M+1); HRMS (ESI): calcd. for  $\text{C}_{20}\text{H}_{18}\text{BrFN}_2\text{O}_5$  [M+H] $^+$  465.0461; found 465.0463.

**Ethyl 3-fluoro-5-nitro-2-oxo-6-phenyl-4-(*p*-tolyl)piperidine-3-carboxylate (4l):**

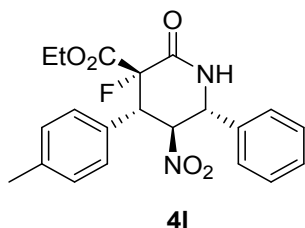

Following the general procedure, the title compound **4l** was obtained as a white solid (55% yield, 22 mg, 5:1 dr). The enantiomeric excess was determined by HPLC analysis (Venusil Chiral OD-H, 85:15 hexane/*i*-PrOH, 0.5 mL/min,  $\lambda = 254$  nm):  $t_{\text{minor}} = 13.38$  min,  $t_{\text{major}} = 10.54$  min, 95% ee.  $^1\text{H}$  NMR (300 MHz,  $\text{CDCl}_3$ ):  $\delta$  7.46–7.41 (m, 2H), 7.35–7.28 (m, 2H), 7.07 (s, 5H), 5.78 (dd,  $J = 12.4, 6.2$  Hz, 1H), 5.39 (d,  $J = 5.8$  Hz, 1H), 4.56–4.11 (m, 3H), 1.21 (t,  $J = 7.1$  Hz, 3H), 1.21 (t,  $J = 7.1$  Hz, 3H);  $^{13}\text{C}$  NMR (75 MHz,  $\text{CDCl}_3$ ):  $\delta$  138.8, 133.5, 129.9, 129.7, 129.2, 128.4, 127.8, 127.2, 118.5, 83.8, 63.0, 57.2, 44.4, 44.1, 21.1, 13.9;  $^{19}\text{F}$  NMR (282 MHz,  $\text{CDCl}_3$ ):  $\delta$  -164.9. MS (APCI)  $m/z$ : 401.1 (M+1); HRMS (ESI): calcd. for  $\text{C}_{21}\text{H}_{21}\text{FN}_2\text{O}_5$  [M+H] $^+$  401.1513; found 401.1492.

**Ethyl 3-fluoro-4-(4-methoxyphenyl)-5-nitro-2-oxo-6-phenylpiperidine-3-carboxylate (4m):**



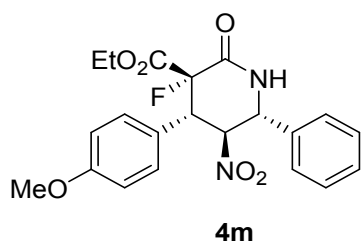

Following the general procedure, the title compound **4m** was obtained as a white solid (69% yield, 28 mg, 3:1 dr). The enantiomeric excess was determined by HPLC analysis (Venusil Chiral OD-H, 90:10 hexane/*i*-PrOH, 1 mL/min,  $\lambda = 254$  nm):  $t_{\text{minor}} = 45.22$  min,  $t_{\text{major}} = 39.45$  min, 91% ee.  $^1\text{H}$  NMR (300 MHz,  $\text{CDCl}_3$ ):  $\delta$  7.43 (dd,  $J = 6.5, 3.6$  Hz, 2H), 7.39–7.29 (m, 2H), 7.21 (d,  $J = 8.7$  Hz, 2H), 6.83 (d,  $J = 8.9$  Hz, 2H), 6.31 (s, 1H), 5.32 (dd,  $J = 12.2, 10.1$  Hz, 1H), 5.18 (dd,  $J = 9.9, 2.7$  Hz, 1H), 4.47–4.10 (m, 3H), 3.76 (s, 3H), 1.17 (t,  $J = 7.1$  Hz, 3H);  $^{13}\text{C}$  NMR (75 MHz,  $\text{CDCl}_3$ ):  $\delta$  164.7, 163.2, 162.9, 160.4, 135.4, 130.5, 129.8, 127.2, 127.0, 121.6, 114.6, 88.4, 63.1, 60.9, 55.4, 45.0, 49.7, 14.2;  $^{19}\text{F}$  NMR (282 MHz,  $\text{CDCl}_3$ ):  $\delta$  -163.3. MS (APCI)  $m/z$ : 417.1 (M+1); HRMS (ESI): calcd. for  $\text{C}_{21}\text{H}_{21}\text{FN}_2\text{O}_6$  [M+H] $^+$  417.1462; found 417.1462.

#### Ethyl 3-fluoro-4-(furan-2-yl)-5-nitro-2-oxo-6-phenylpiperidine-3-carboxylate (**4n**):

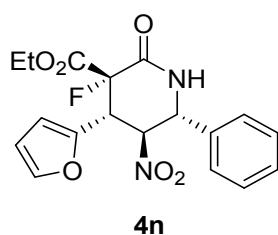

Following the general procedure, the title compound **4n** was obtained as a white solid (62% yield, 23 mg, 3.5:1 dr). The enantiomeric excess was determined by HPLC analysis (Venusil Chiral CJ, 95:5 hexane/*i*-PrOH, 1 mL/min,  $\lambda = 254$  nm):  $t_{\text{minor}} = 24.66$  min,  $t_{\text{major}} = 22.90$  min, 96% ee.  $^1\text{H}$  NMR (300 MHz,  $\text{CDCl}_3$ ):  $\delta$  7.44 (dd,  $J = 8.3, 4.9$  Hz, 4H), 7.36–7.27 (m, 2H), 6.40 (s, 1H), 6.33–6.29 (m, 1H), 6.23 (d,  $J = 3.3$  Hz, 1H), 5.76 (dd,  $J = 11.8, 6.1$  Hz, 1H), 5.40 (d,  $J = 5.8$  Hz, 1H), 4.65 (dd,  $J = 29.2, 11.9$  Hz, 1H), 4.39 (q,  $J = 7.1$  Hz, 2H), 1.35 (t,  $J = 7.2$  Hz, 3H);  $^{13}\text{C}$  NMR (75 MHz,  $\text{CDCl}_3$ ):  $\delta$  215.6, 201.3, 144.0, 143.4, 134.8, 130.5, 129.7, 126.9, 110.8, 86.6, 73.2, 63.3, 60.4, 44.4, 41.6;  $^{19}\text{F}$  NMR (282 MHz,  $\text{CDCl}_3$ ):  $\delta$  -161.2, -170.0. MS (APCI)  $m/z$ : 377.1 (M+1); HRMS (ESI): calcd. for  $\text{C}_{18}\text{H}_{17}\text{FN}_2\text{O}_6$  [M+Na] $^+$  399.0968; found 399.0978.

#### Ethyl 4,6-bis(4-bromophenyl)-3-fluoro-5-nitro-2-oxopiperidine-3-carboxylate (**4o**):

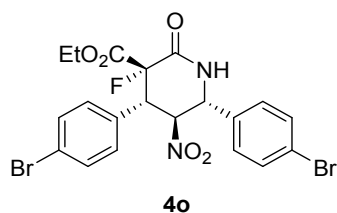

Following the general procedure, the title compound **4o** was obtained as a white solid (67% yield, 36 mg, 4:1 dr). The enantiomeric excess was determined by HPLC analysis (Venusil Chiral OD-H, 90:10 hexane/*i*-PrOH, 1 mL/min,  $\lambda = 254$  nm):  $t_{\text{minor}} = 49.20$  min,  $t_{\text{major}} = 22.47$  min, 99% ee.  $^1\text{H}$  NMR (300 MHz,  $\text{CDCl}_3$ ):  $\delta$  7.58 (d,  $J = 8.5$  Hz, 2H), 7.47 (d,  $J = 8.6$  Hz, 2H), 7.29–7.01 (m, 5H), 5.32–5.21 (m, 1H), 5.16 (dd,  $J = 8.7, 3.8$  Hz, 1H), 4.35 (dd,  $J = 30.4, 12.2$  Hz, 1H), 4.19 (q,  $J = 7.1$  Hz, 2H), 1.16 (t,  $J = 7.1$  Hz, 3H);  $^{13}\text{C}$  NMR (75 MHz,  $\text{CDCl}_3$ ):  $\delta$  199.8, 164.6, 162.7, 133.9, 132.9, 132.5, 132.3, 132.2, 130.7, 130.2, 128.8, 128.4, 124.8, 124.0, 87.5, 63.2, 60.1, 49.8, 49.6, 13.9;  $^{19}\text{F}$  NMR (282 MHz,  $\text{CDCl}_3$ ):  $\delta$  -163.1, -164.7. MS (APCI)  $m/z$ : 545.1 (M+1); HRMS (ESI): calcd. for  $\text{C}_{20}\text{H}_{17}\text{Br}_2\text{FN}_2\text{O}_5$ [M+Na] $^+$  564.9386; found 564.9384.

**Ethyl 6-(4-bromophenyl)-3-fluoro-4-(4-methoxyphenyl)-5-nitro-2-oxopiperidine-3-carboxylate (4p):**

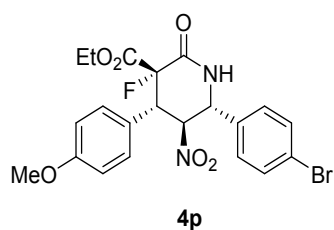

Following the general procedure, the title compound **4p** was obtained as colorless oil (65% yield, 28 mg, 3:1 dr). The enantiomeric excess was determined by HPLC analysis (Venusil Chiral OD-H, 90:10 hexane/*i*-PrOH, 1 mL/min,  $\lambda = 254$  nm):  $t_{\text{minor}} = 30.16$  min,  $t_{\text{major}} = 20.45$  min, 98% ee.  $^1\text{H}$  NMR (300 MHz,  $\text{CDCl}_3$ ):  $\delta$  7.58 (d,  $J = 8.3$  Hz, 2H), 7.21 (d,  $J = 8.5$  Hz, 2H), 7.12 (d,  $J = 8.6$  Hz, 2H), 6.82 (d,  $J = 8.6$  Hz, 2H), 6.35 (s, 1H), 5.76 (dd,  $J = 12.4, 6.3$  Hz, 1H), 5.38 (dd,  $J = 6.3, 3.1$  Hz, 1H), 4.47–4.15 (m, 3H), 1.24 (t,  $J = 7.1$  Hz, 3H);  $^{13}\text{C}$  NMR (75 MHz,  $\text{CDCl}_3$ ):  $\delta$  134.2, 132.9, 132.6, 132.5, 130.3, 129.8, 129.6, 128.8, 128.5, 124.6, 121.2, 118.5, 114.4, 88.0, 63.0, 60.1, 55.2, 49.7, 49.5, 14.0;  $^{19}\text{F}$  NMR (282 MHz,  $\text{CDCl}_3$ ):  $\delta$  -165.3. MS (APCI)  $m/z$ : 495.1 (M+1); HRMS (ESI): calcd. for  $\text{C}_{21}\text{H}_{20}\text{BrFN}_2\text{O}_6$ [M+H] $^+$  495.0567; found 495.0565.

**Ethyl 1-allyl-3-fluoro-5-nitro-2-oxo-4-phenylpiperidine-3-carboxylate (4q):**

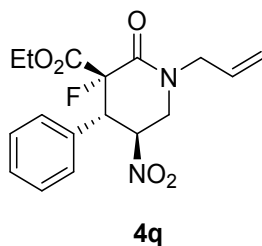

Following the general procedure, the title compound **4q** was obtained as the colorless oil (57% yield, 20 mg, 5:1 dr). The enantiomeric excess was determined by HPLC analysis (Regis (*R,R*)-Whelk-O1, 80:20 hexane/*i*-PrOH, 1 mL/min,  $\lambda = 254$  nm):  $t_{\text{minor}} = 12.34$  min,  $t_{\text{major}} = 9.52$  min, 92% ee.  $^1\text{H}$  NMR (300 MHz,  $\text{CDCl}_3$ ):  $\delta$  7.62–7.03 (m, 5H), 5.79 (ddd,  $J = 12.5, 10.4, 5.3$  Hz, 1H), 5.45 (ddd,  $J = 11.4, 8.4, 6.2$  Hz, 1H), 5.32 (dd,  $J = 21.1, 5.5$  Hz, 2H), 4.43–4.11 (m, 3H), 4.10–3.82 (m, 4H), 1.13 (t,  $J = 7.1$  Hz, 3H);  $^{13}\text{C}$  NMR (75 MHz,  $\text{CDCl}_3$ ):  $\delta$  131.2, 131.0, 130.4, 129.3, 129.2, 129.0, 128.1, 120.2, 81.3, 62.8, 49.6, 49.4, 48.4, 13.9;  $^{19}\text{F}$  NMR (282 MHz,  $\text{CDCl}_3$ ):  $\delta$  -158.9, -165.2. MS (APCI)  $m/z$ : 351.1 (M+1); HRMS (ESI): calcd. for  $\text{C}_{17}\text{H}_{19}\text{FN}_2\text{O}_5[\text{M}+\text{H}]^+$  351.1356; found 351.1354.

#### 4. X-Ray Report of 4c

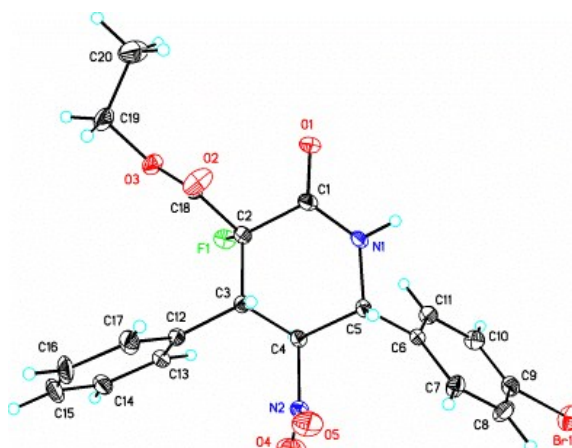

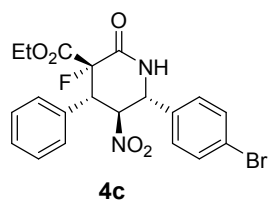

|                        |                                                                                      |                                                                    |
|------------------------|--------------------------------------------------------------------------------------|--------------------------------------------------------------------|
| Bond precision         | c-c=0.0097 Å Wavelength=1.54184                                                      |                                                                    |
| Cell                   | a=22.744(3) b=7.5503(4) c=16.0634(18)<br>$\alpha=90$ $\beta=131.075(18)$ $\gamma=90$ |                                                                    |
| Temperature            | 173K                                                                                 |                                                                    |
|                        | Calculated                                                                           | Reported                                                           |
| Volume                 | 2079.5(7)                                                                            | 2079.5(6)                                                          |
| Space group            | C 2                                                                                  | C 1 2 1                                                            |
| Hall group             | C 2y                                                                                 | C 2y                                                               |
| Moiety formula         | C <sub>20</sub> H <sub>18</sub> Br F N <sub>2</sub> O <sub>5</sub>                   | C <sub>20</sub> H <sub>18</sub> Br F N <sub>2</sub> O <sub>5</sub> |
| Sum formula            | C <sub>20</sub> H <sub>18</sub> Br F N <sub>2</sub> O <sub>5</sub>                   | C <sub>20</sub> H <sub>18</sub> Br F N <sub>2</sub> O <sub>5</sub> |
| Mr                     | 465.26                                                                               | 465.27                                                             |
| Dx, g cm <sup>-3</sup> | 1.486                                                                                | 1.486                                                              |
| Z                      | 4                                                                                    | 4                                                                  |
| Mu (mm <sup>-1</sup> ) | 3.073                                                                                | 3.073                                                              |
| F000                   | 944.0                                                                                | 944.0                                                              |
| F000'                  | 944.14                                                                               |                                                                    |
| h,k,lmax               | 27,9,19                                                                              | 27,9,19                                                            |
| Nref                   | 4027[ 2174]                                                                          | 2972                                                               |
| Tmin,Tmax              | 0.541,0.782                                                                          | 0.398,1.000                                                        |
| Tmin'                  | 0.232                                                                                |                                                                    |
| Data completeness=     | 1.37/0.74                                                                            | Theta(max)= 71.104                                                 |
| R(reflections)=        | 0.0511( 2872)                                                                        | wR2(reflections)= 0.1329( 2972)                                    |
| S =                    | 1.079                                                                                | Npar= 264                                                          |

Crystallographic data (excluding structural factors) for compound **4c** also has been deposited at the Cambridge Crystallographic Data Centre under the deposition number CCDC 1043112.

## 5. LC-MS, <sup>1</sup>H, <sup>13</sup>C, <sup>19</sup>F NMR of Products

Current Chromatogram (s)

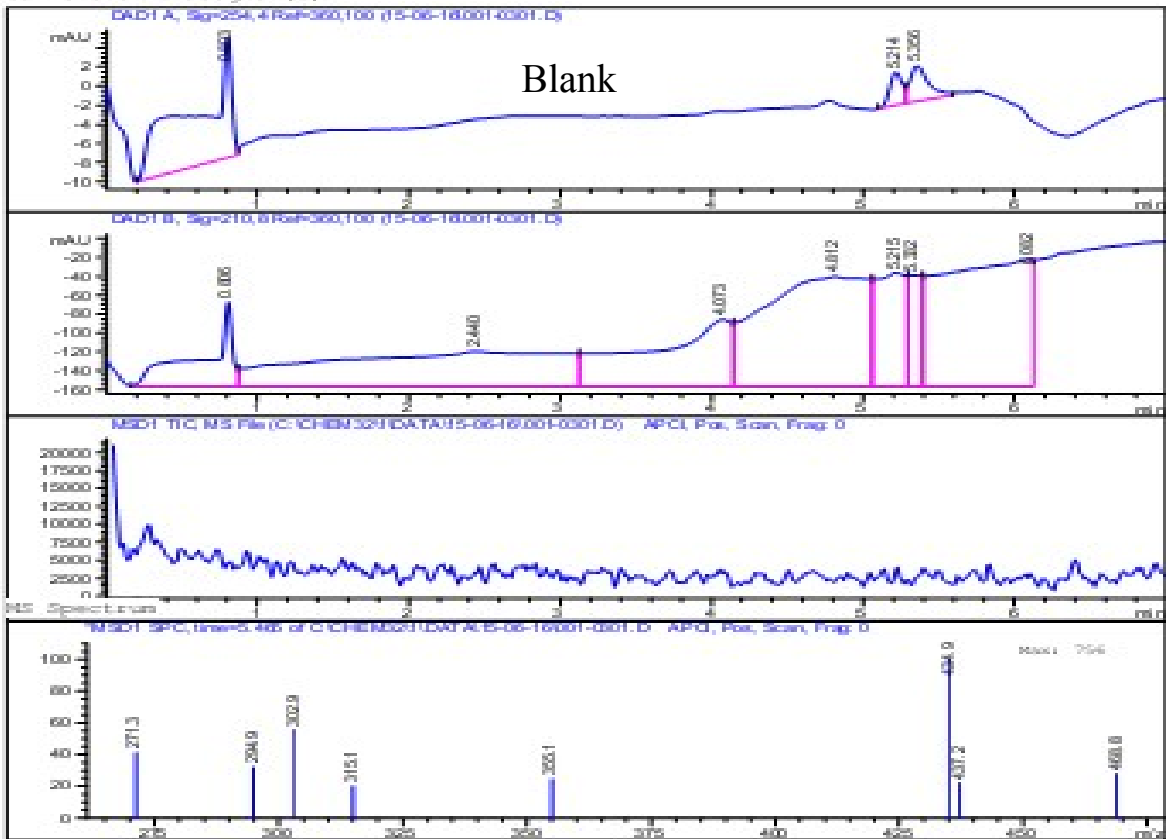

Current Chromatogram (s)

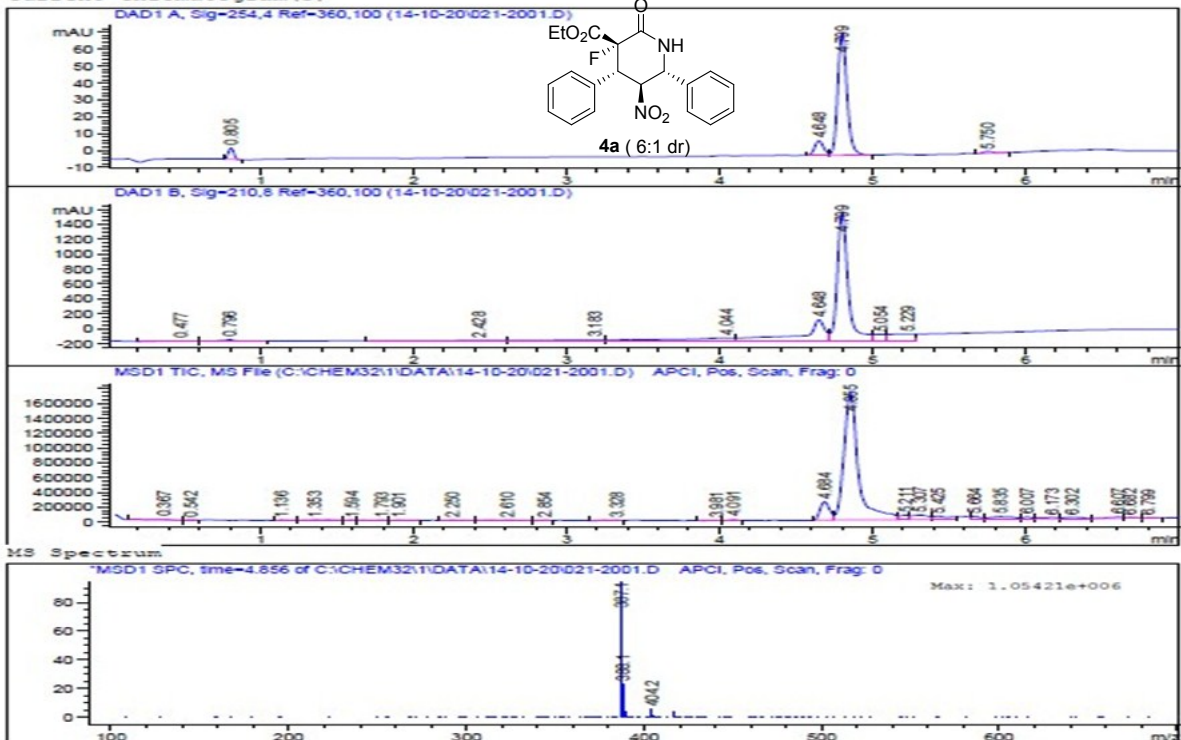

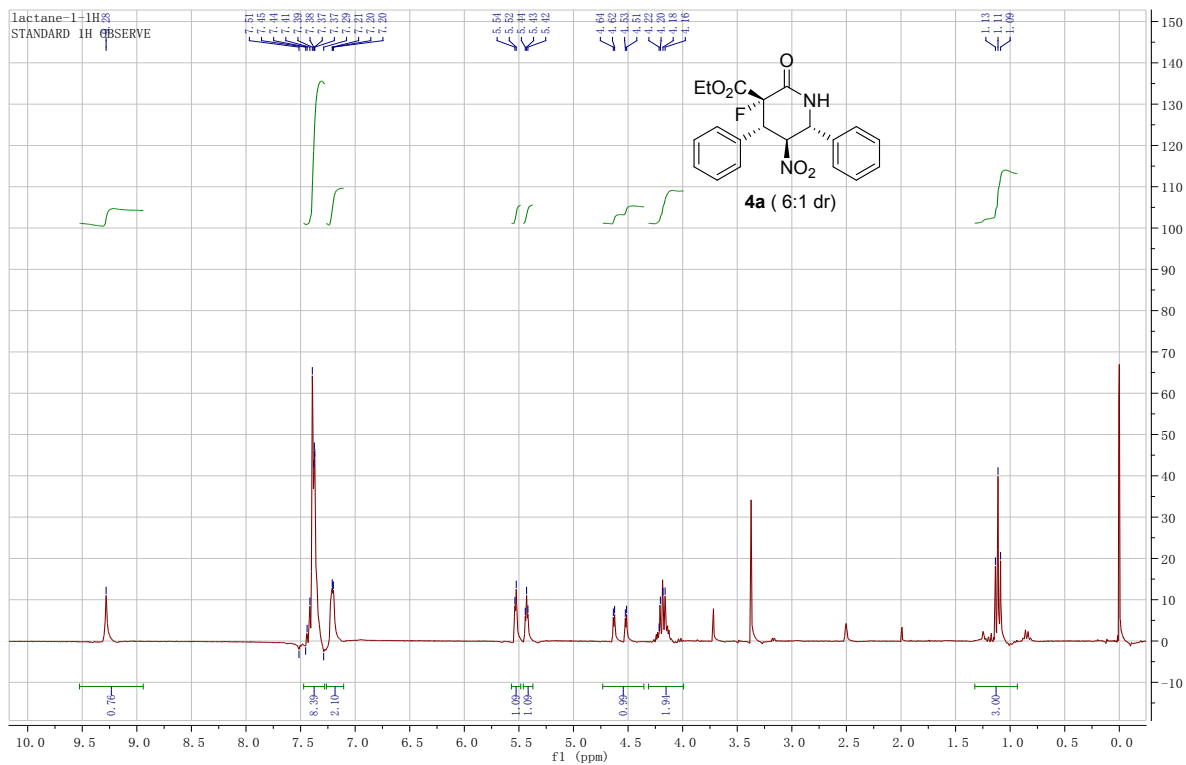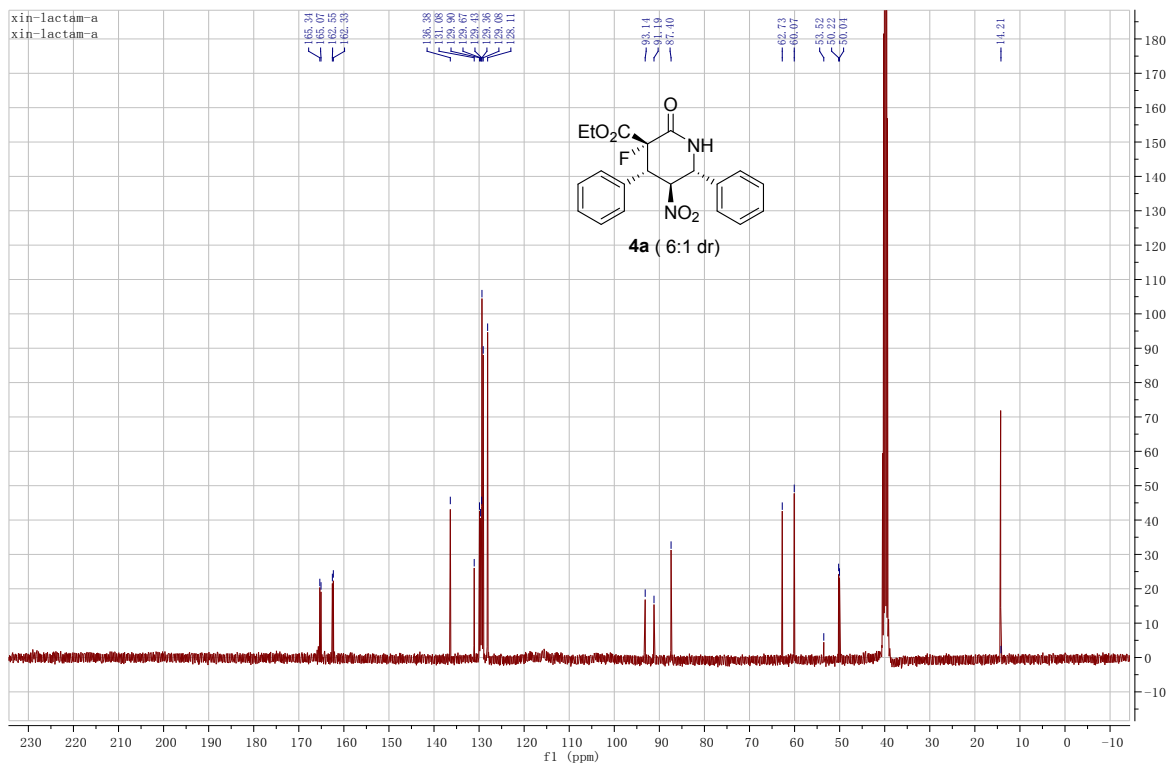

lactane-1-19F  
19F OBSERVE  
STANDARD PARAMETERS

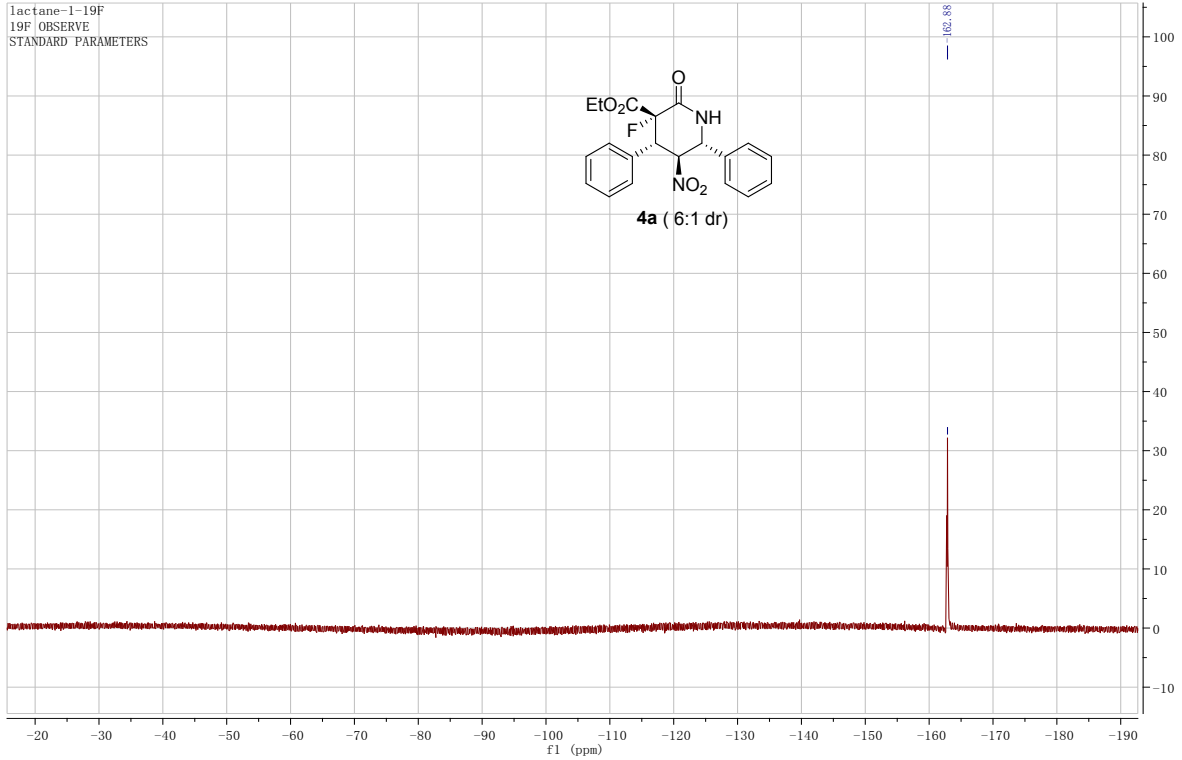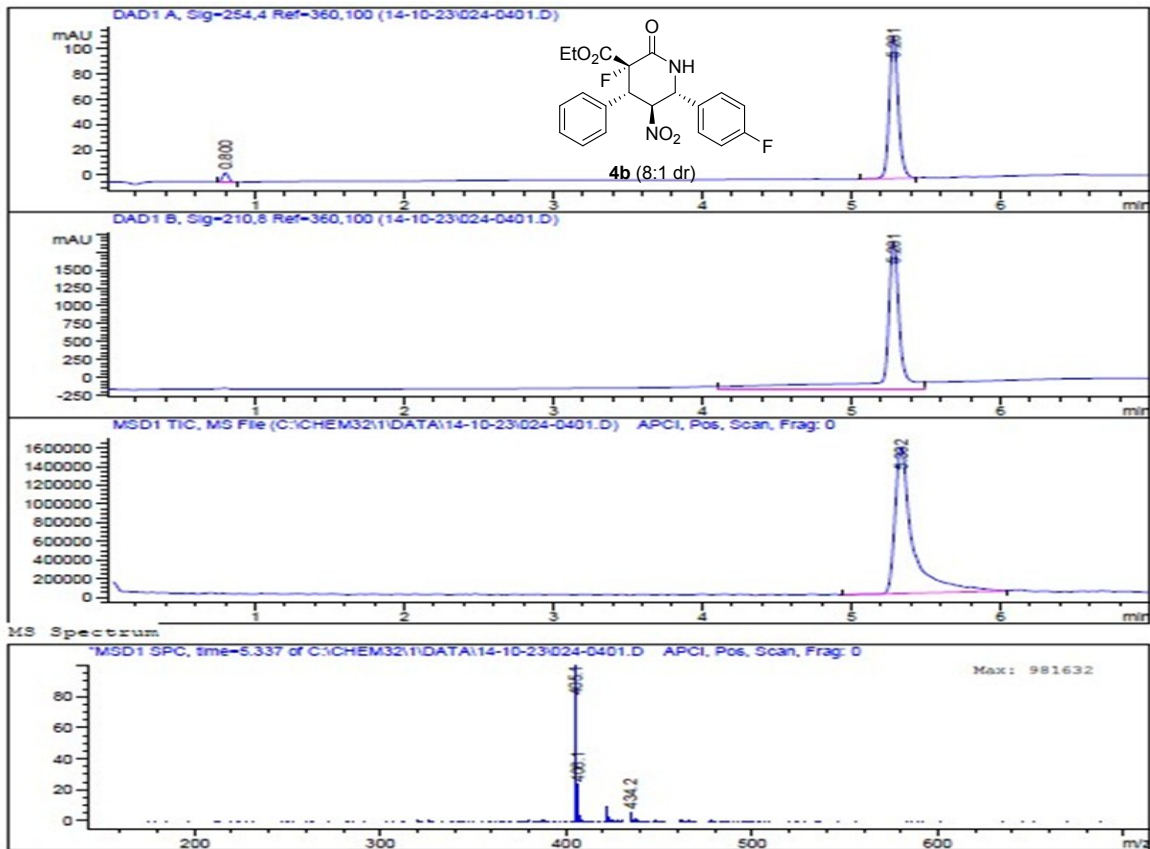

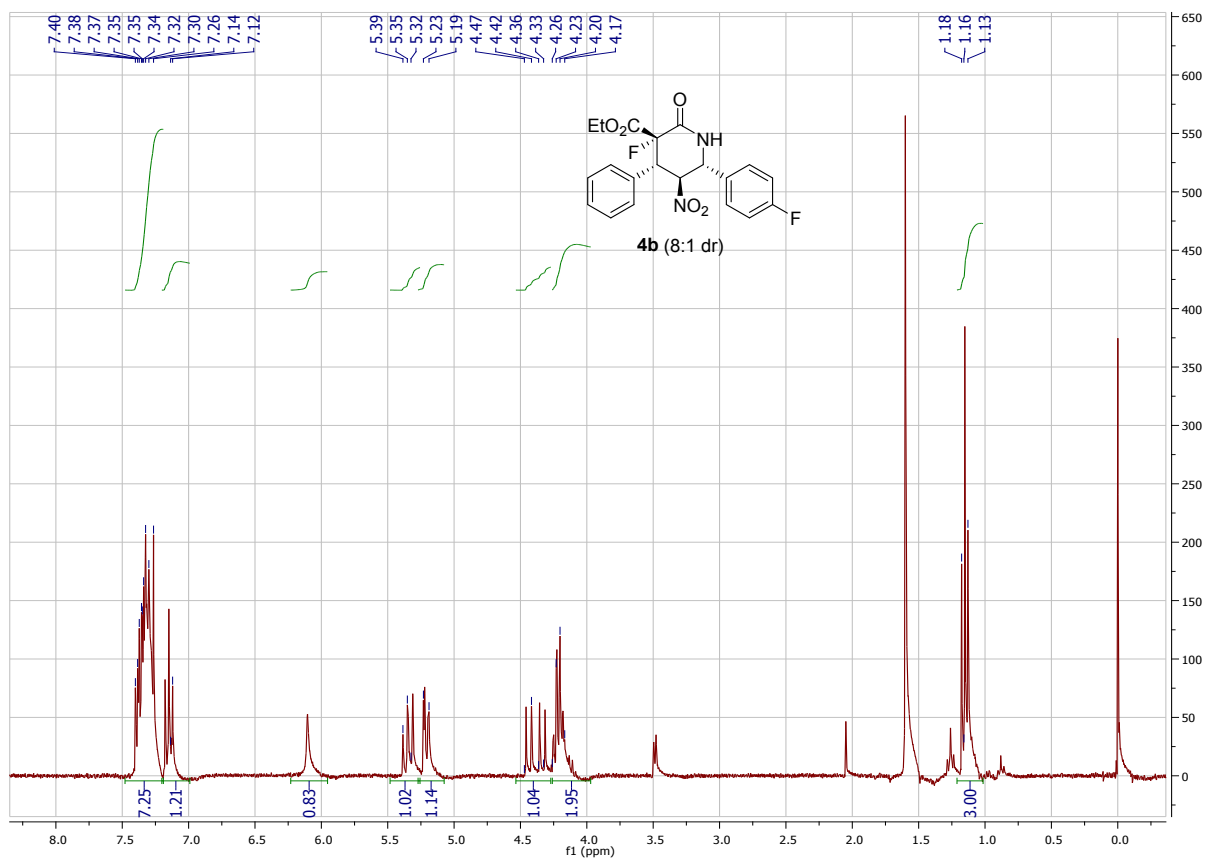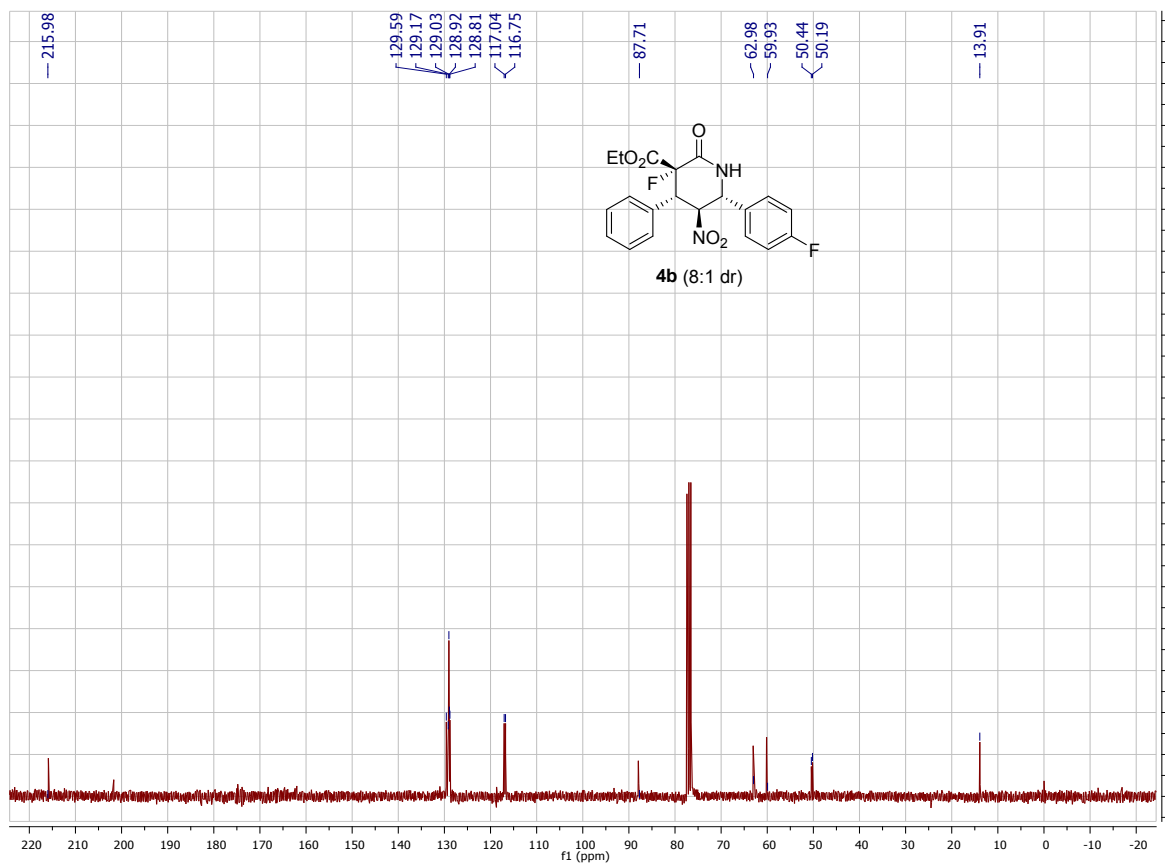



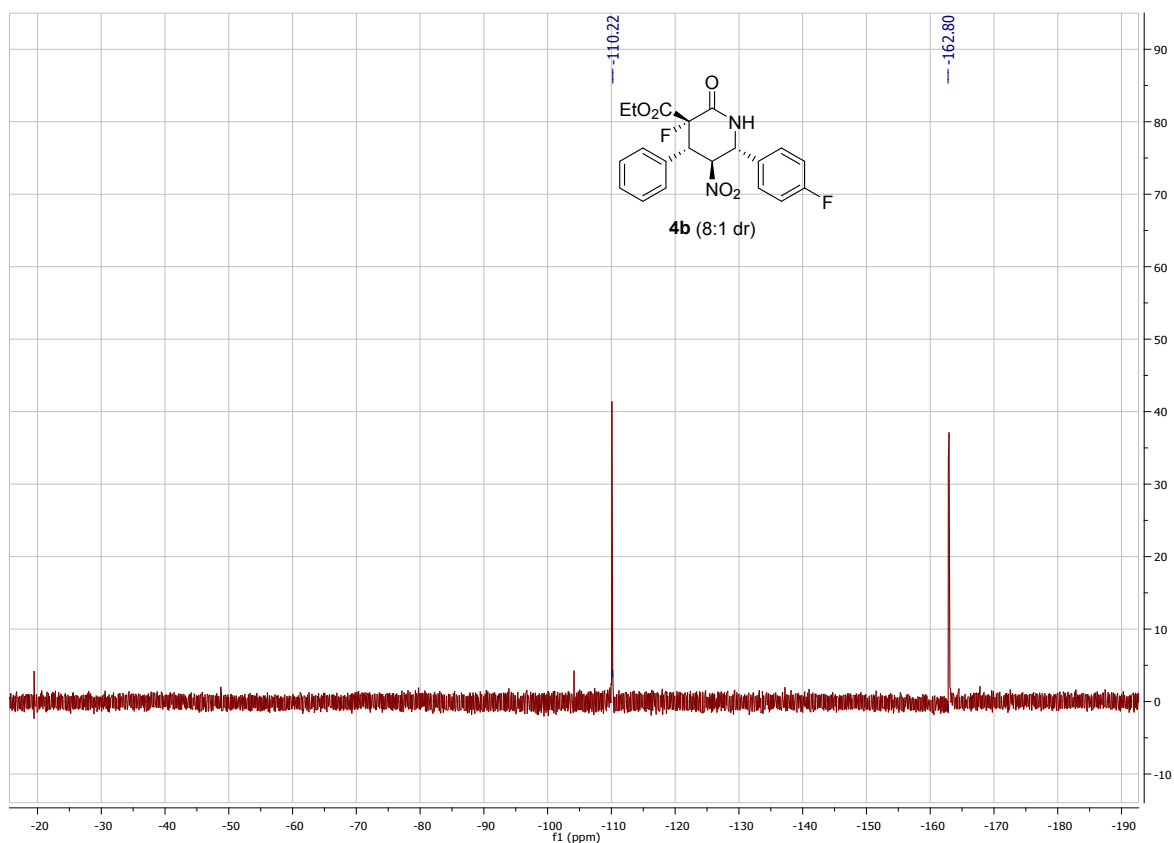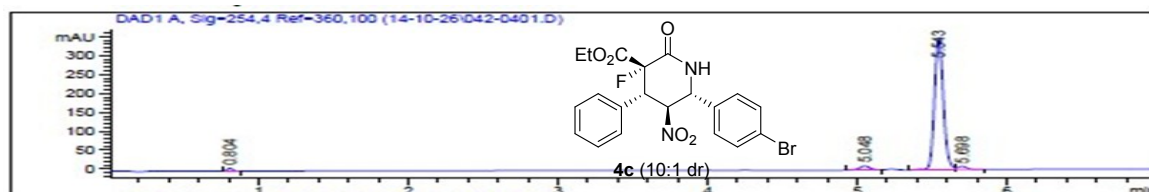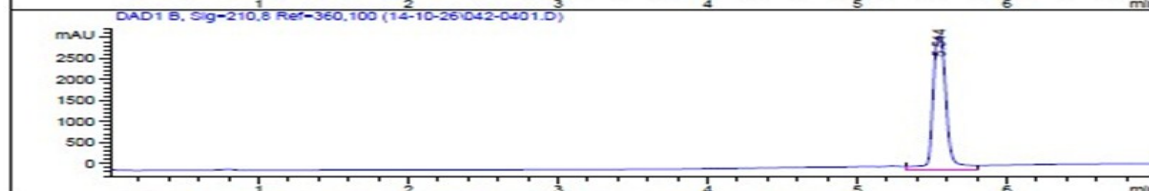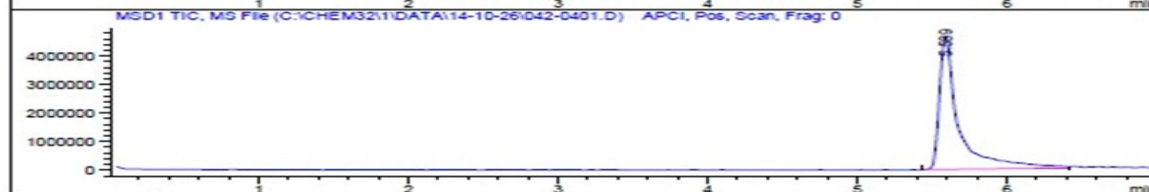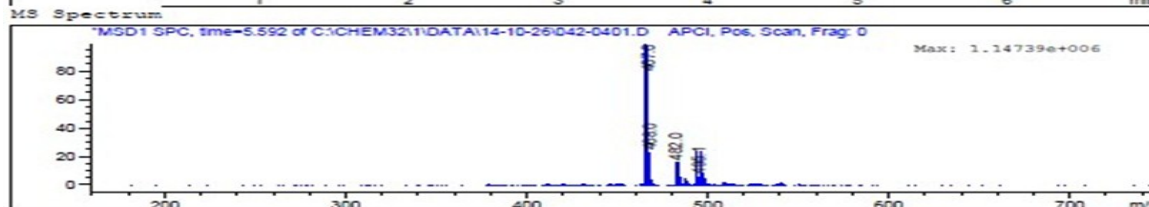

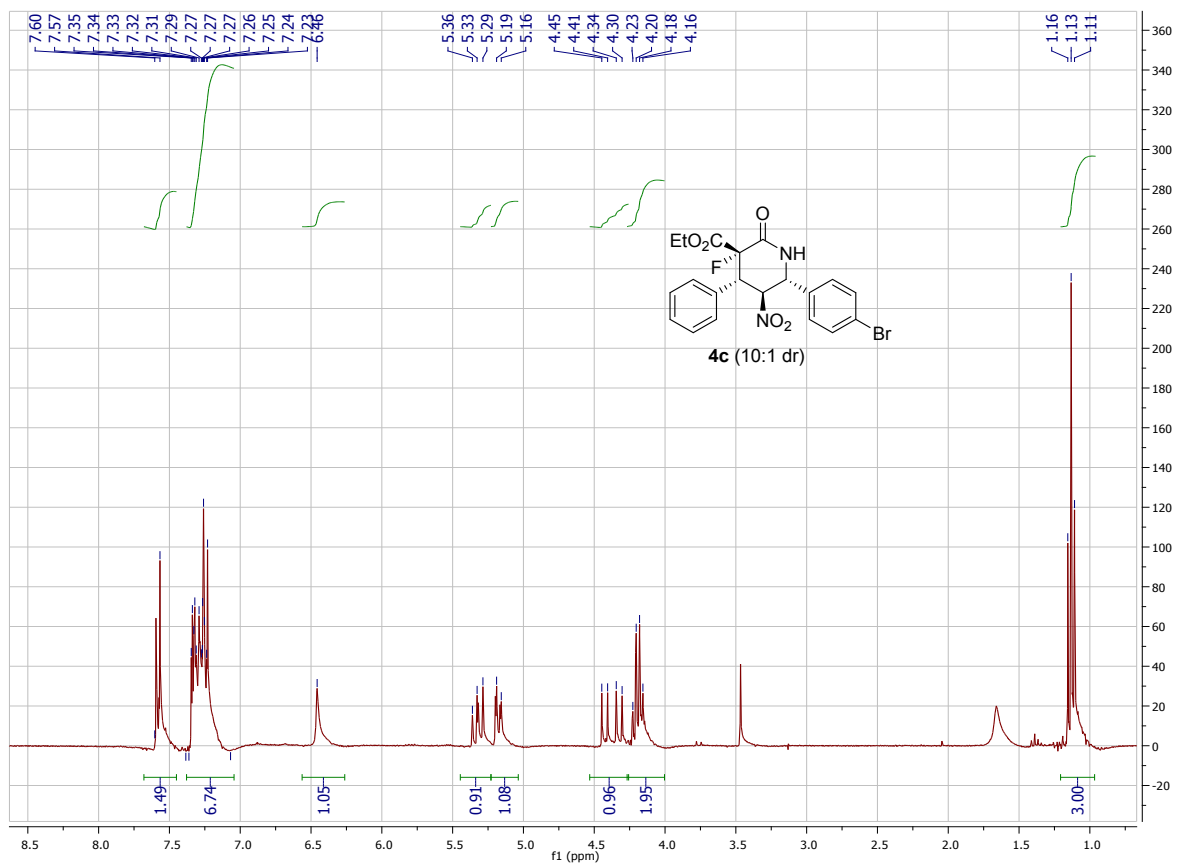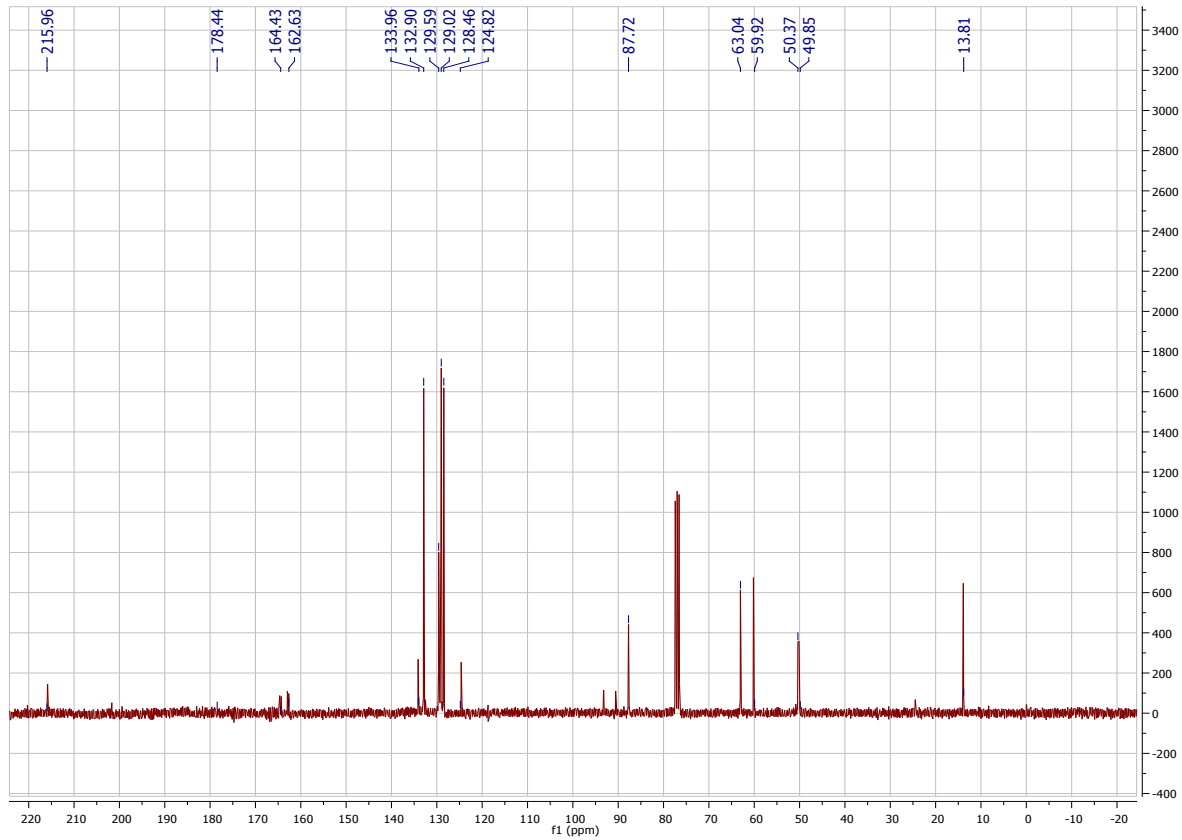

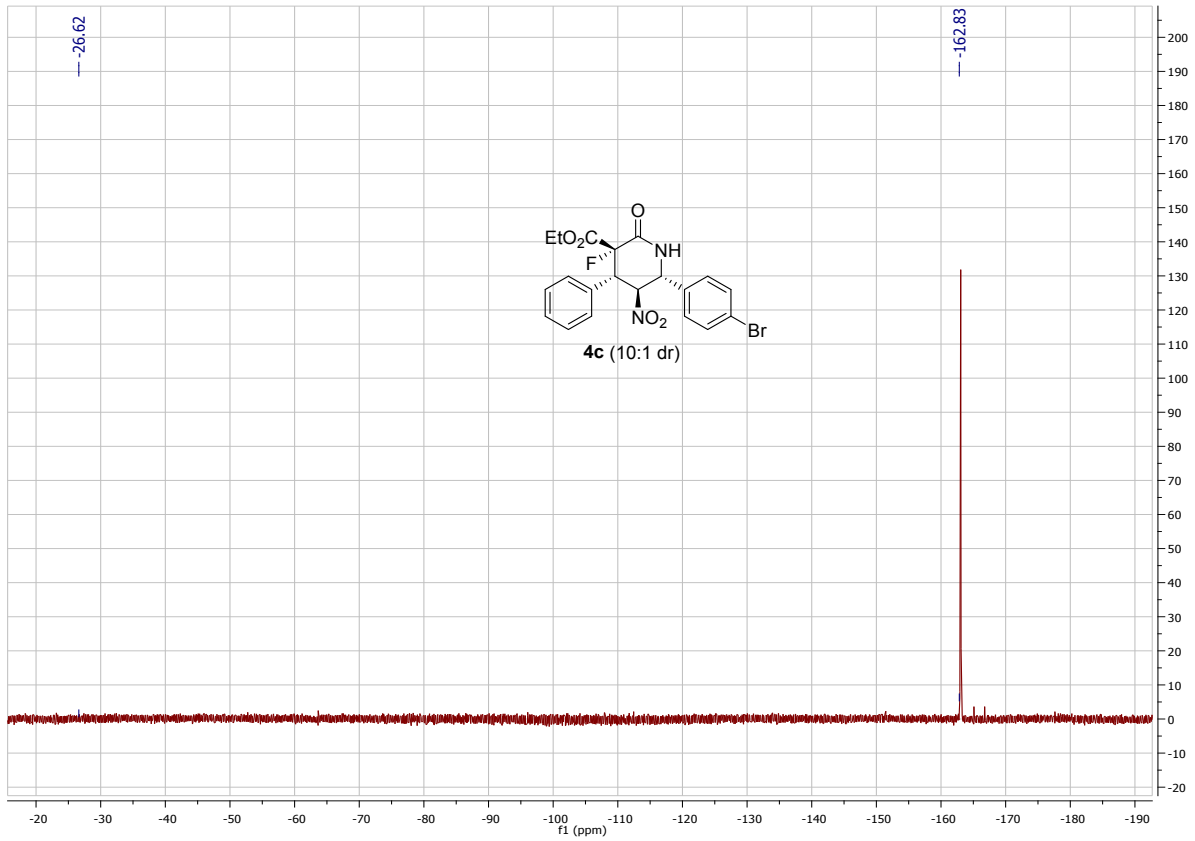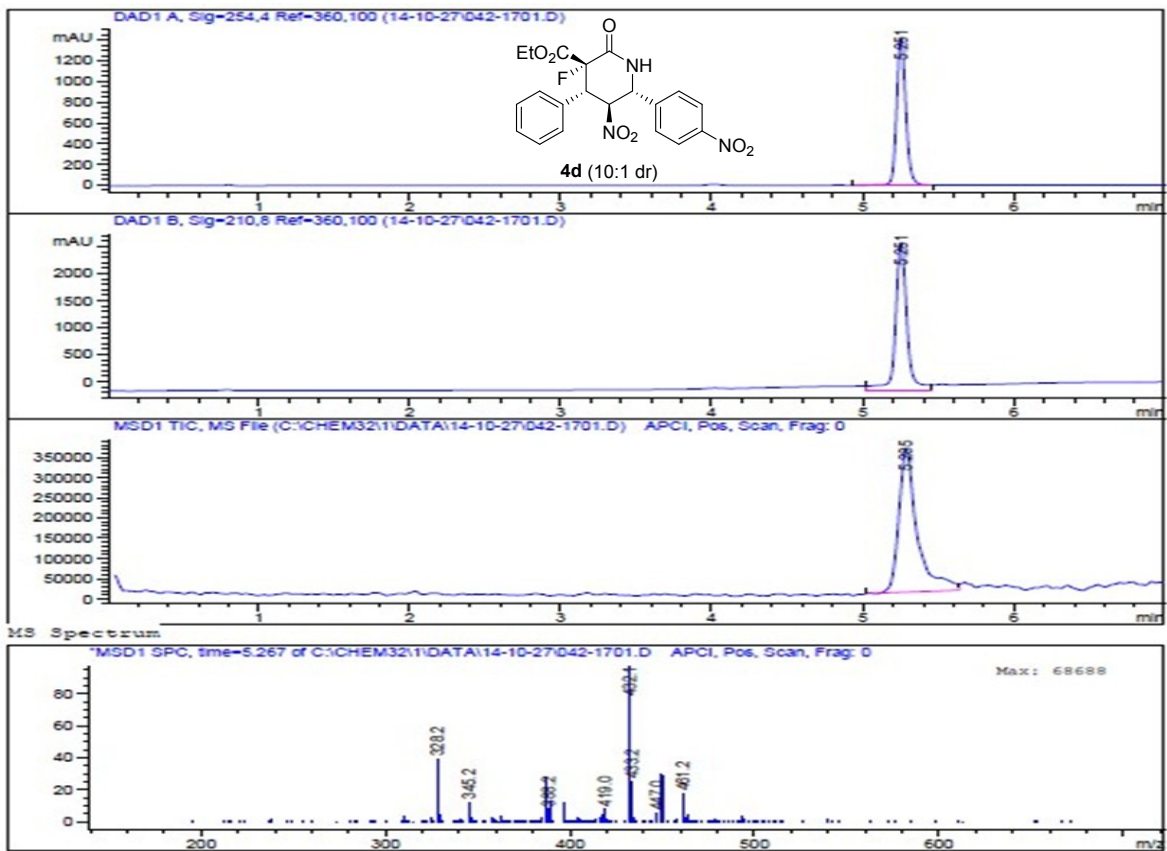

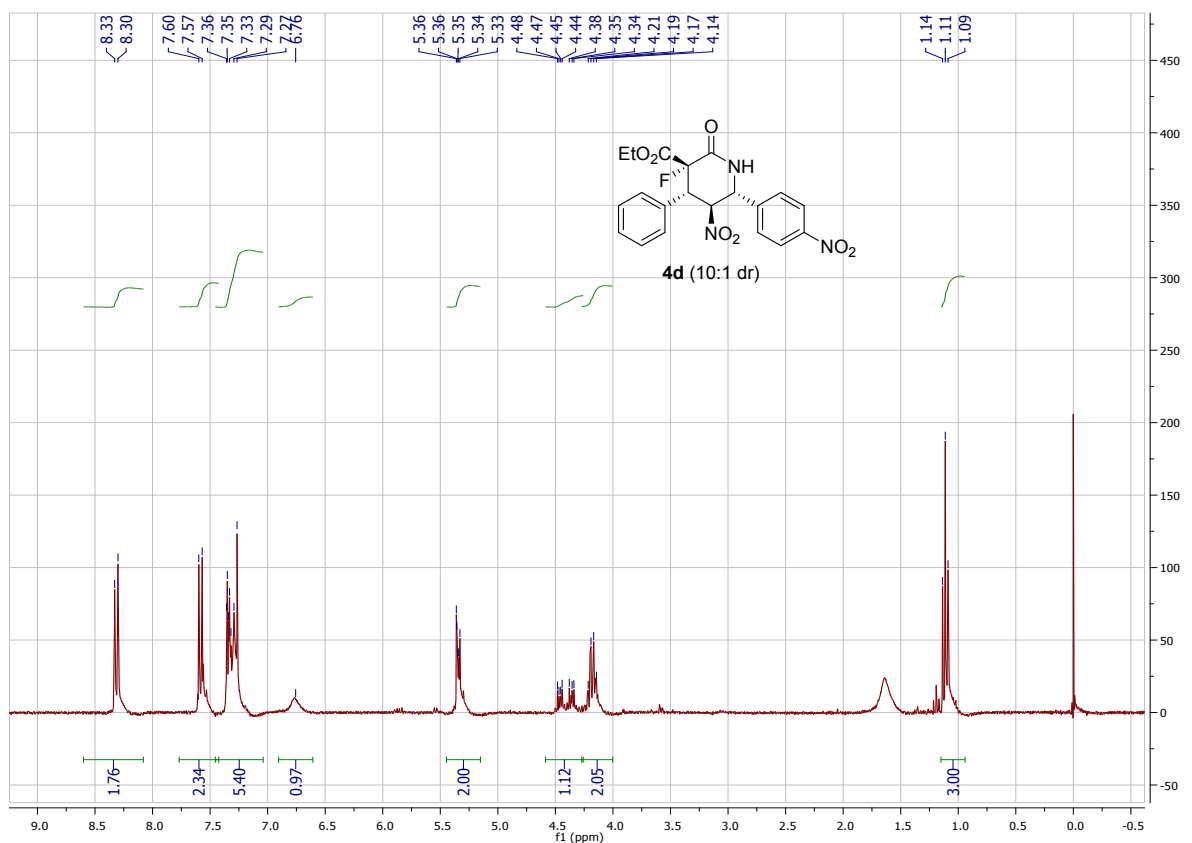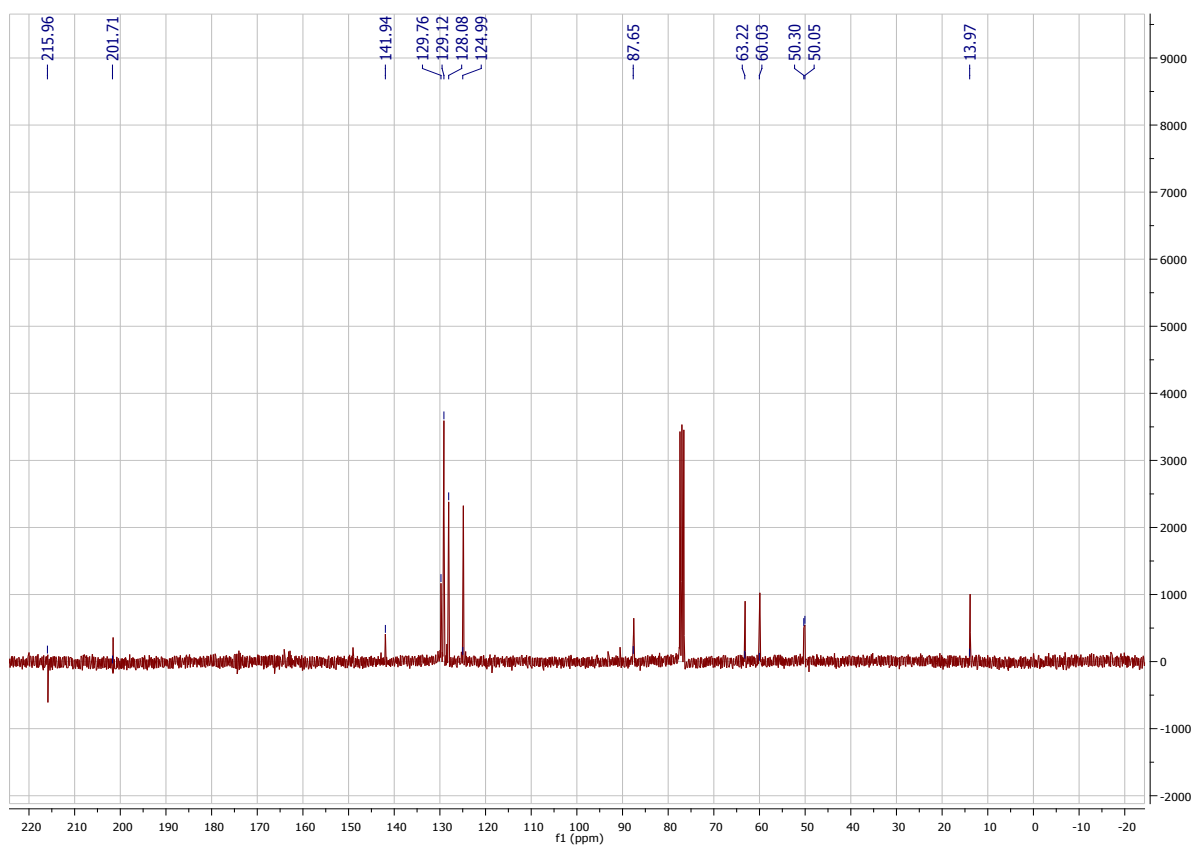

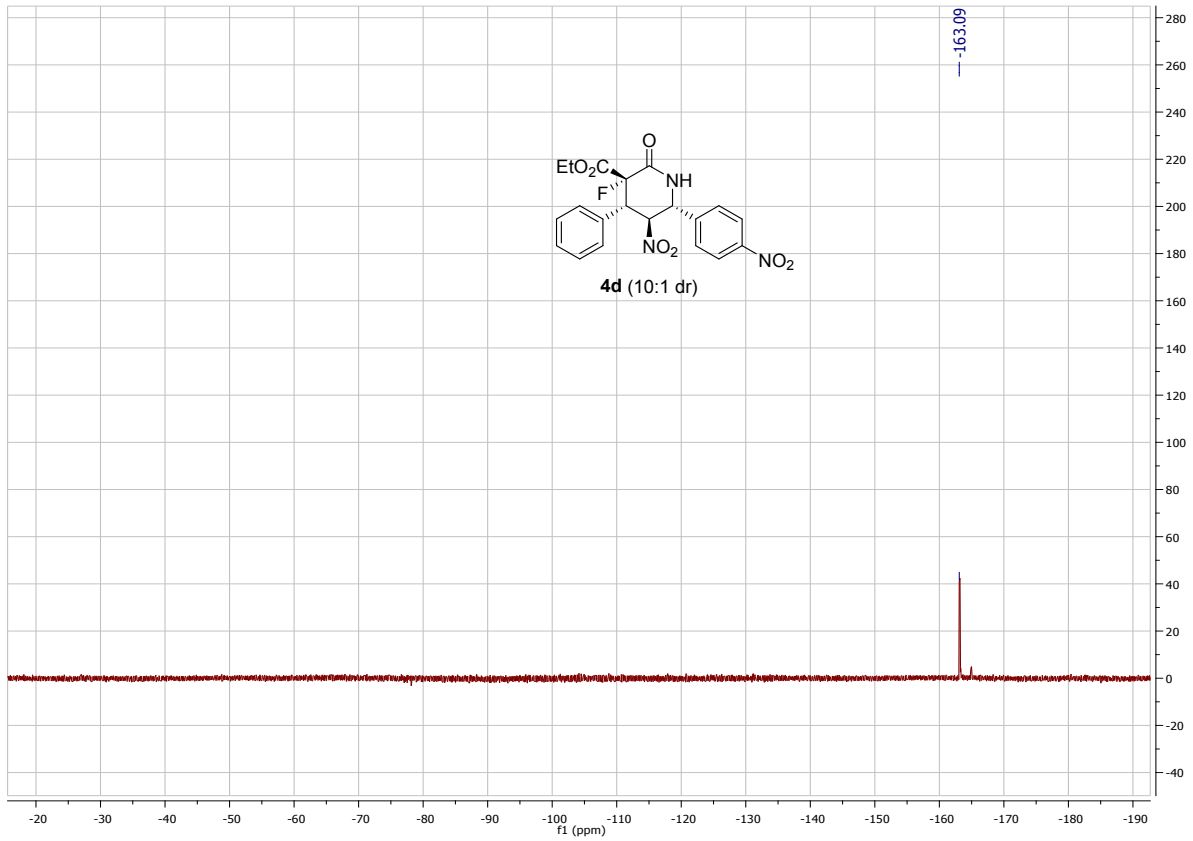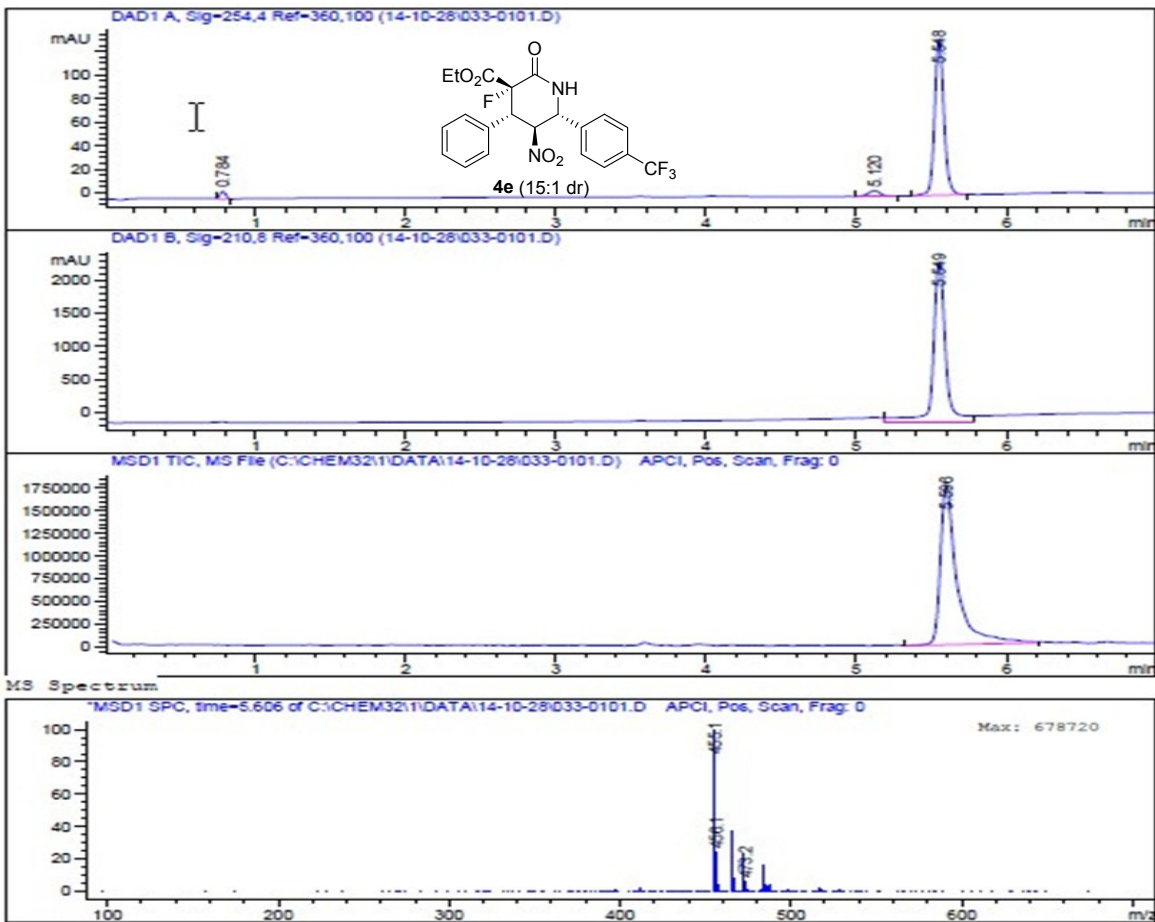

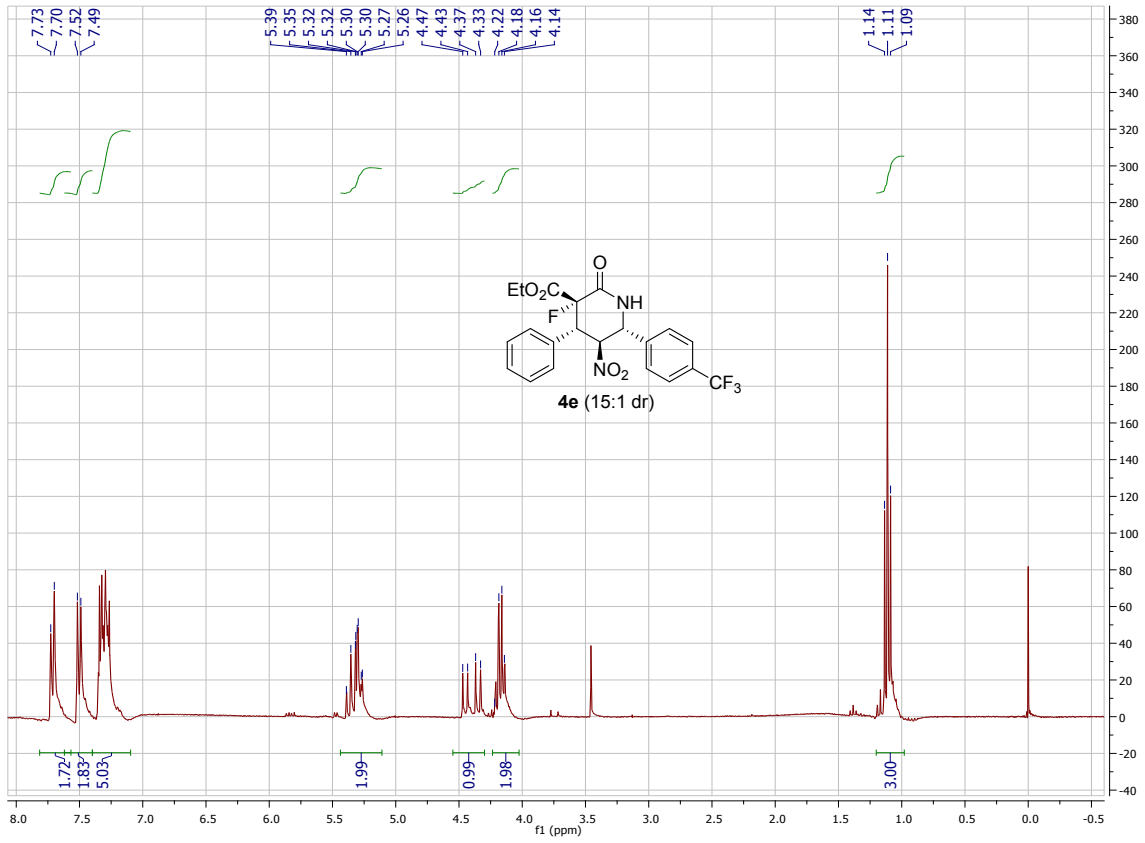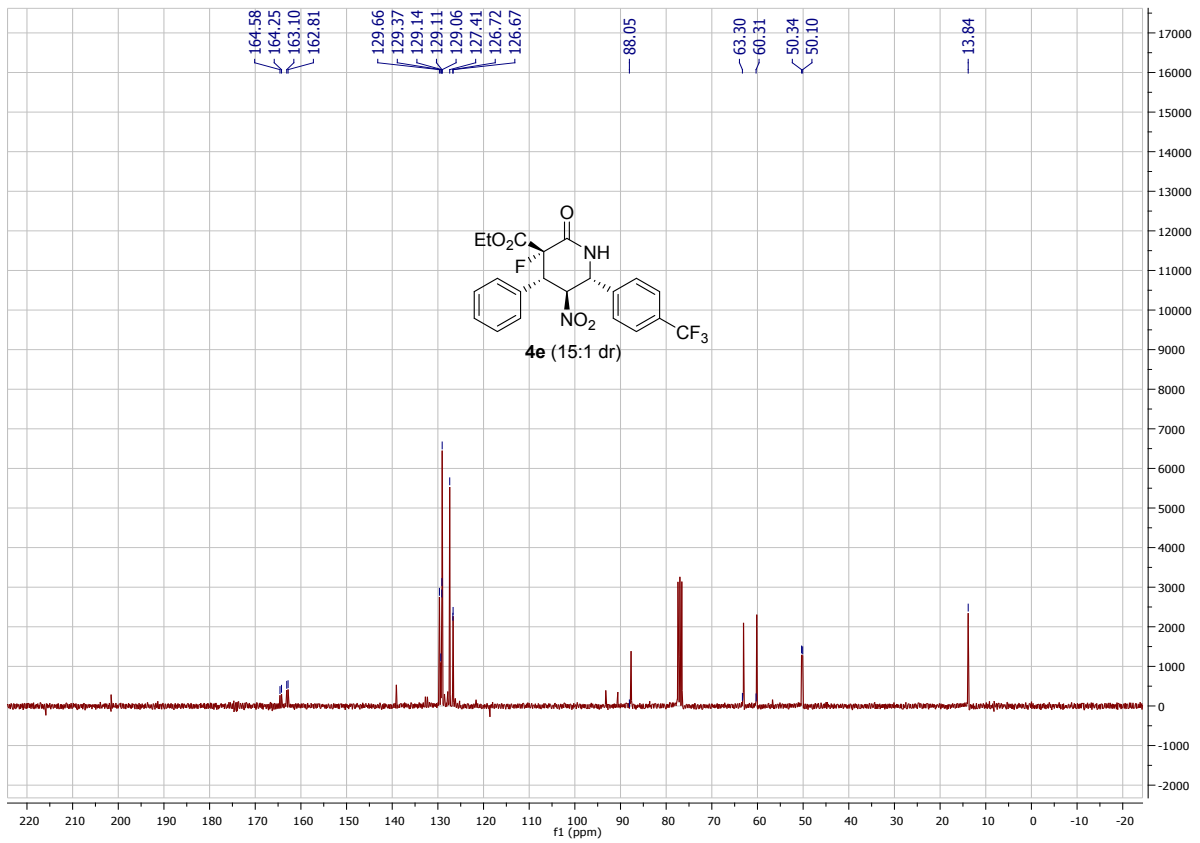

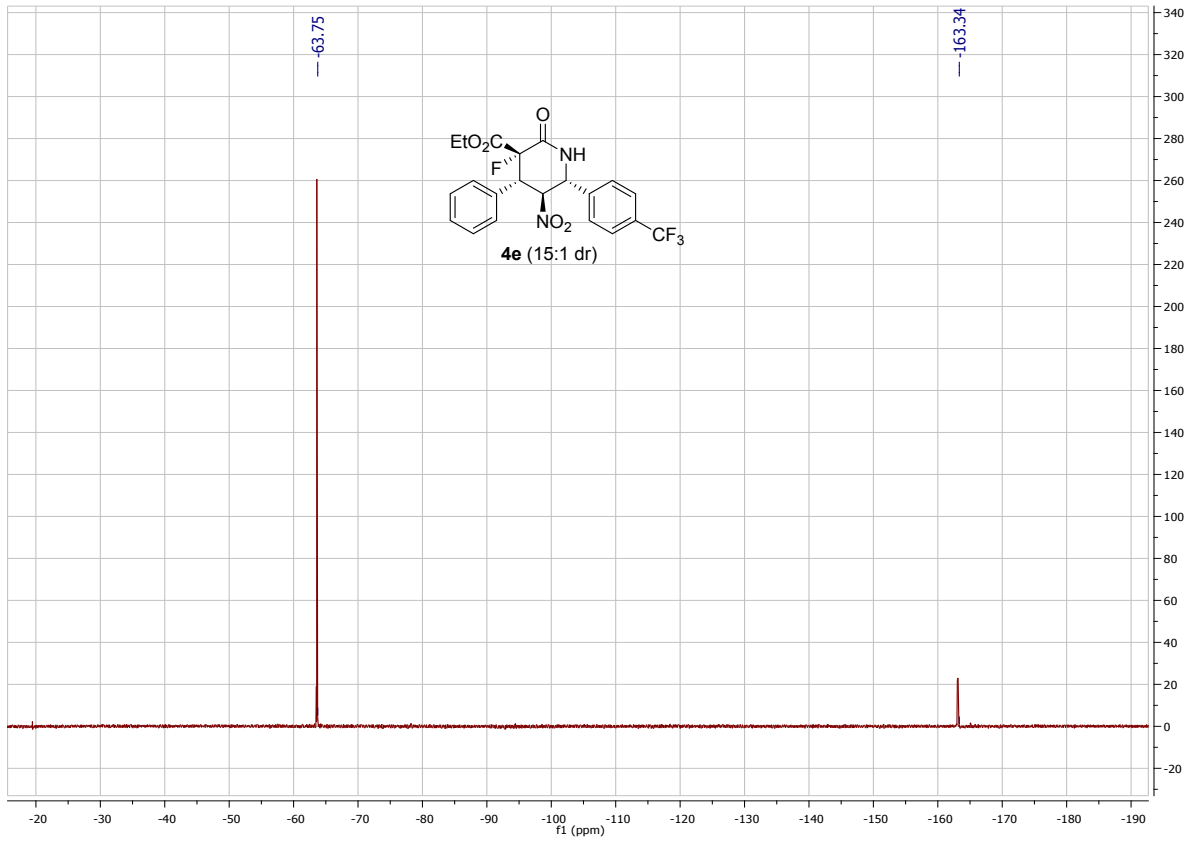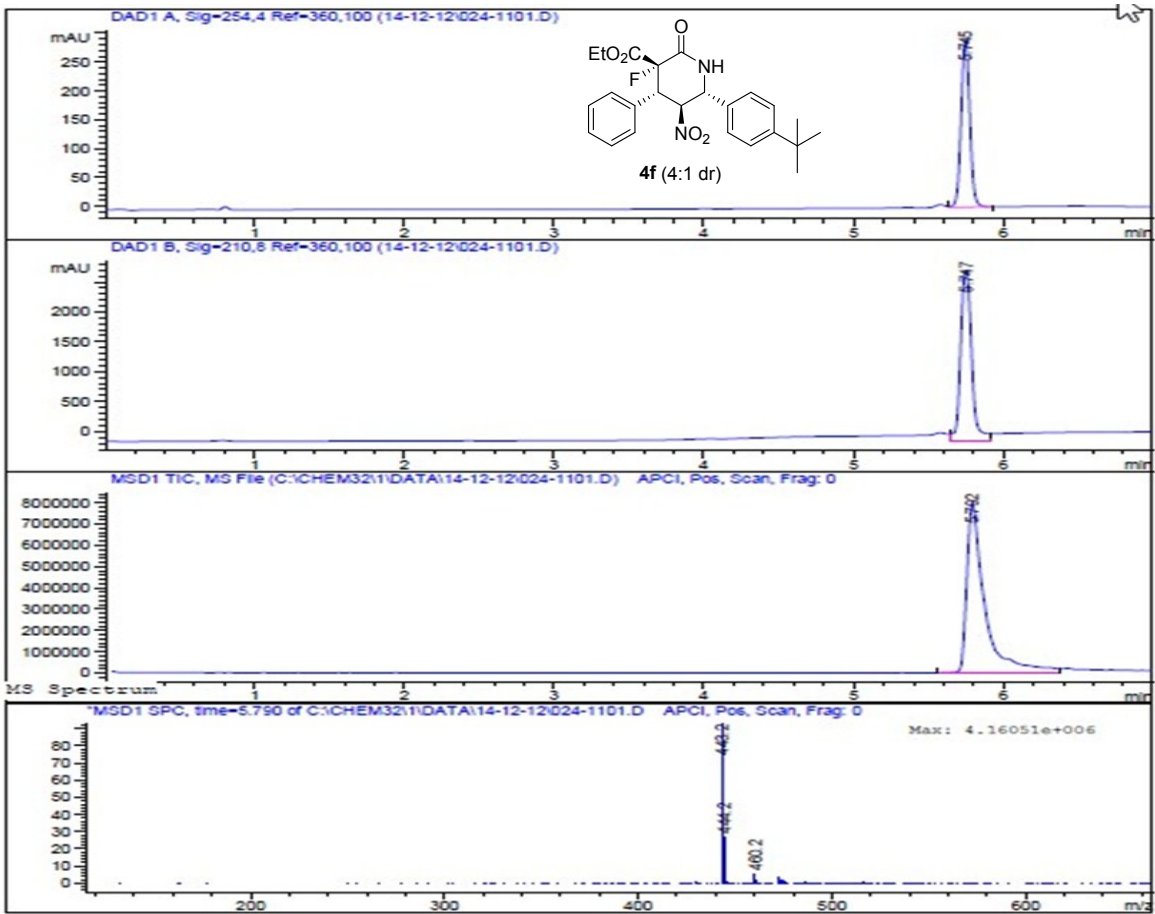

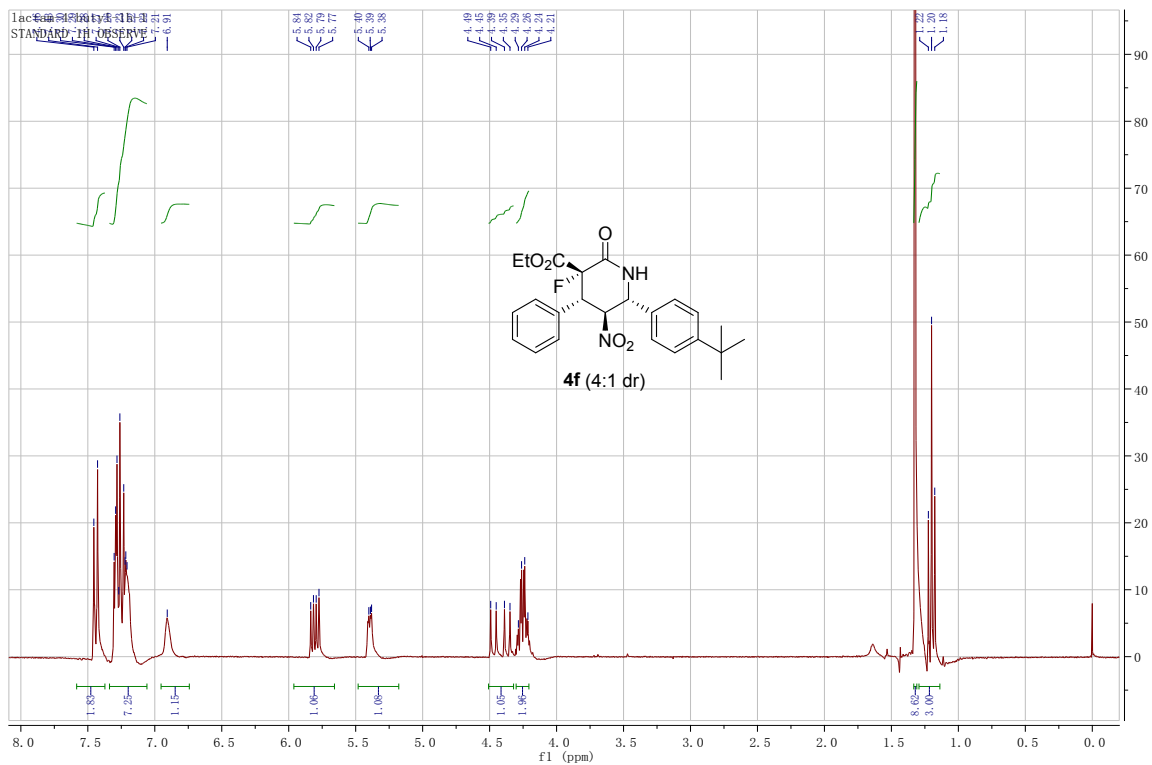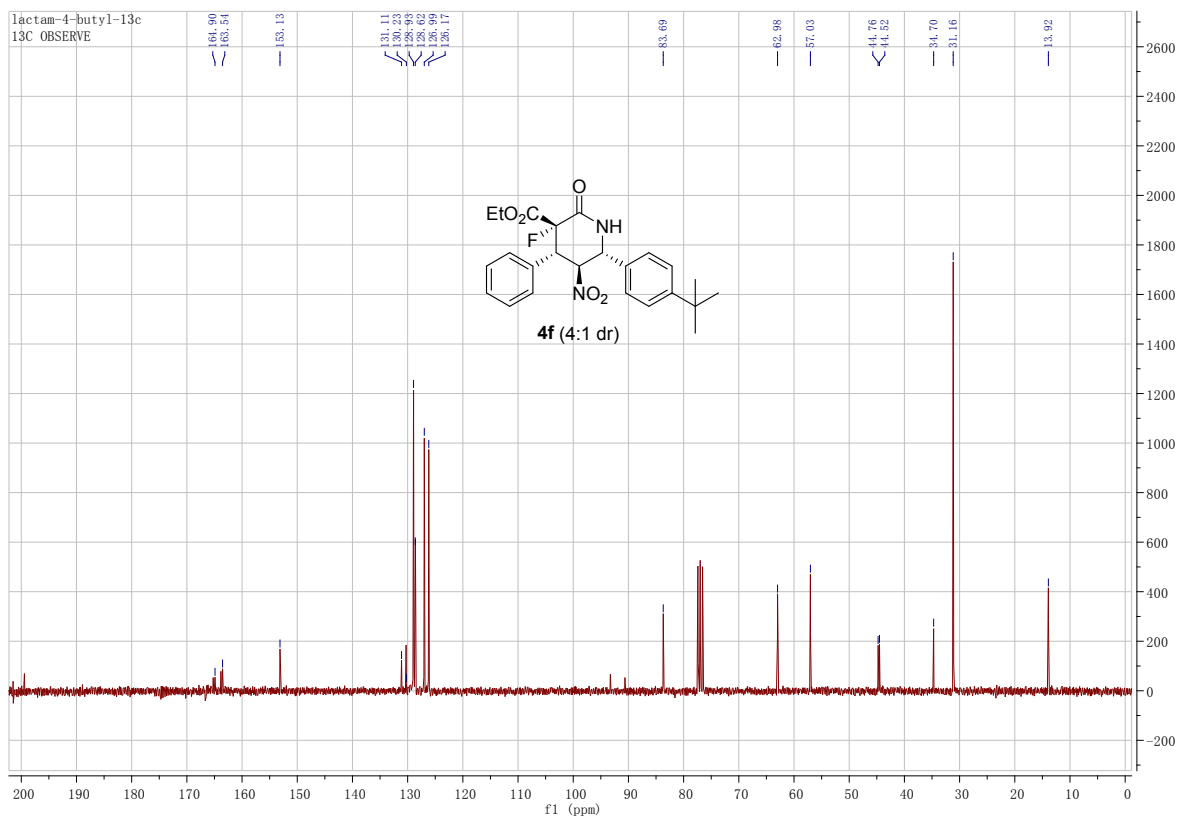



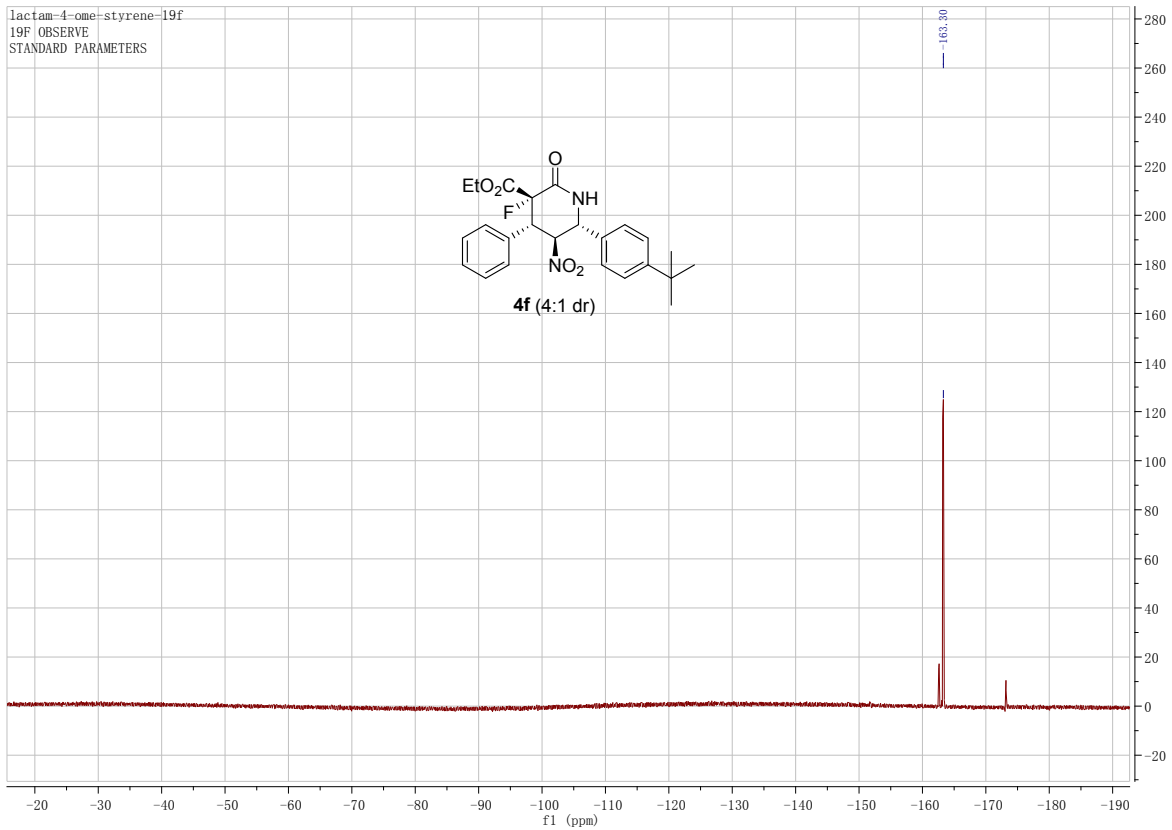

Current Chromatogram (s)

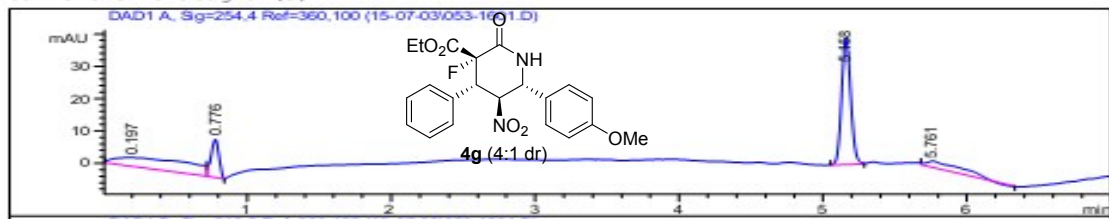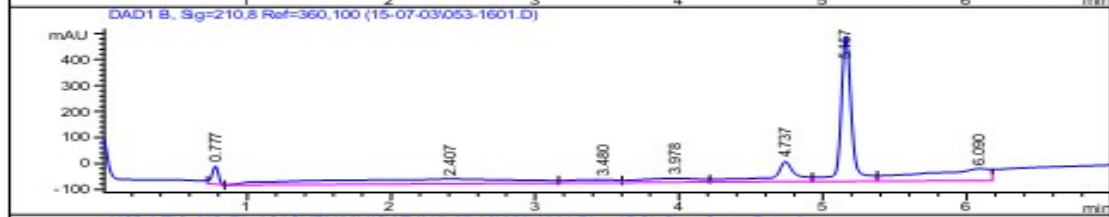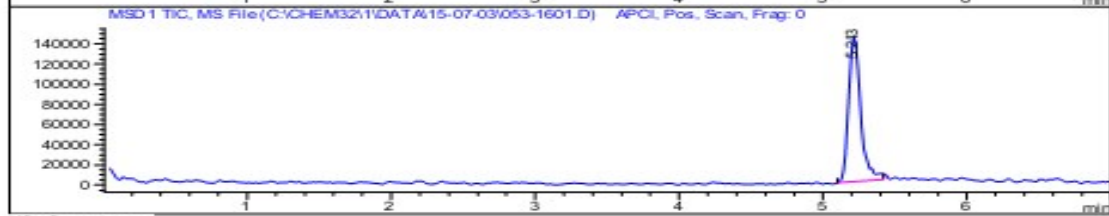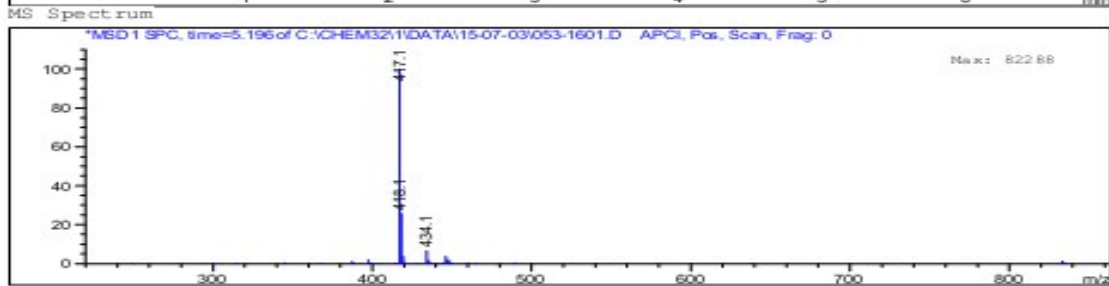

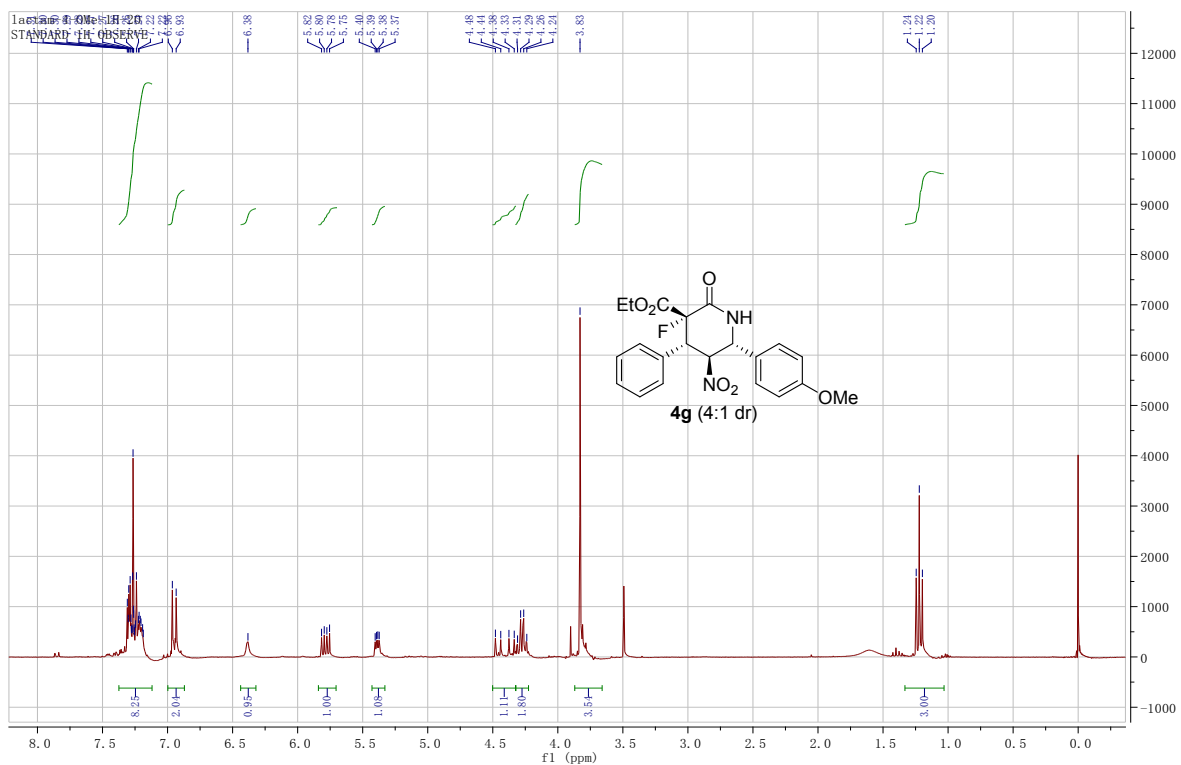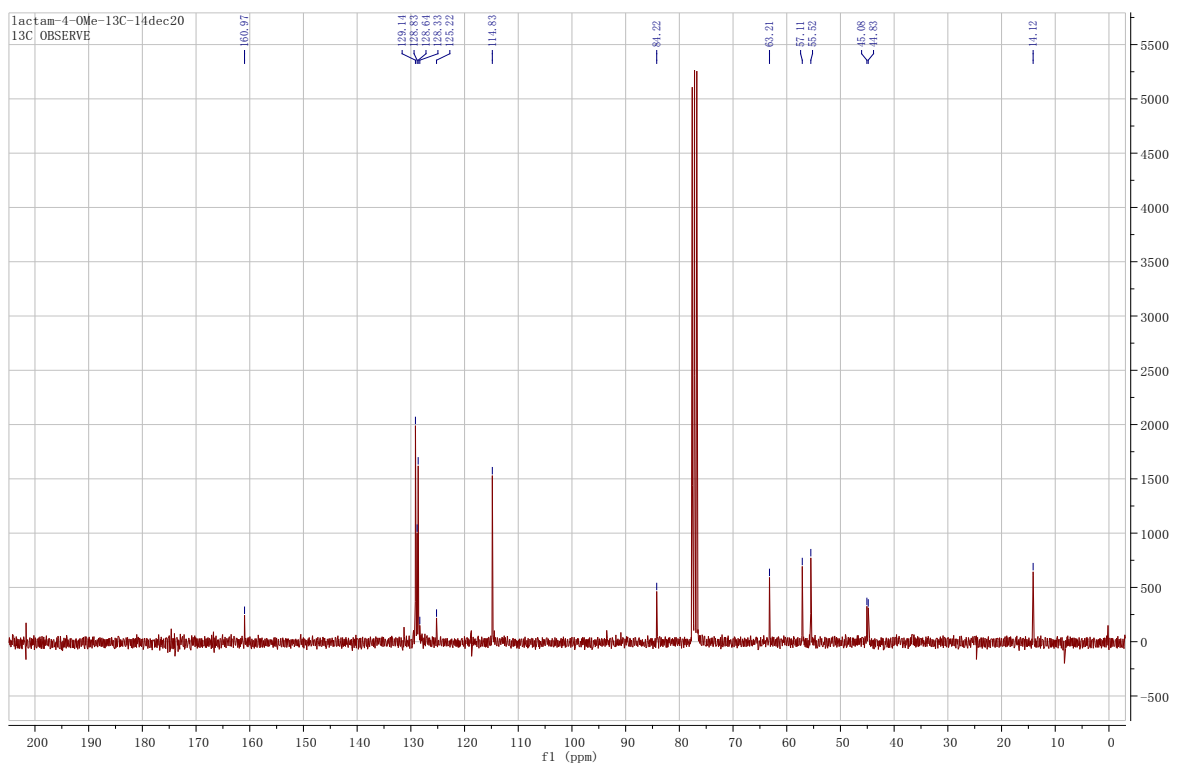

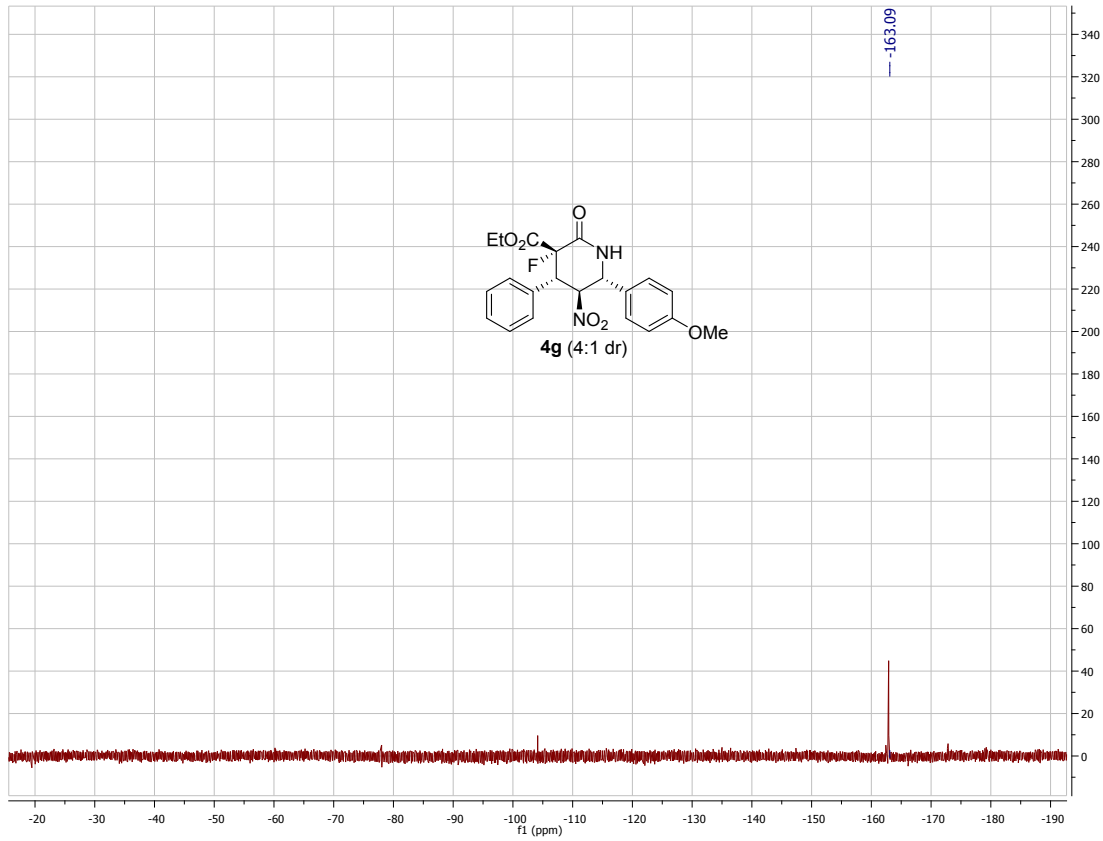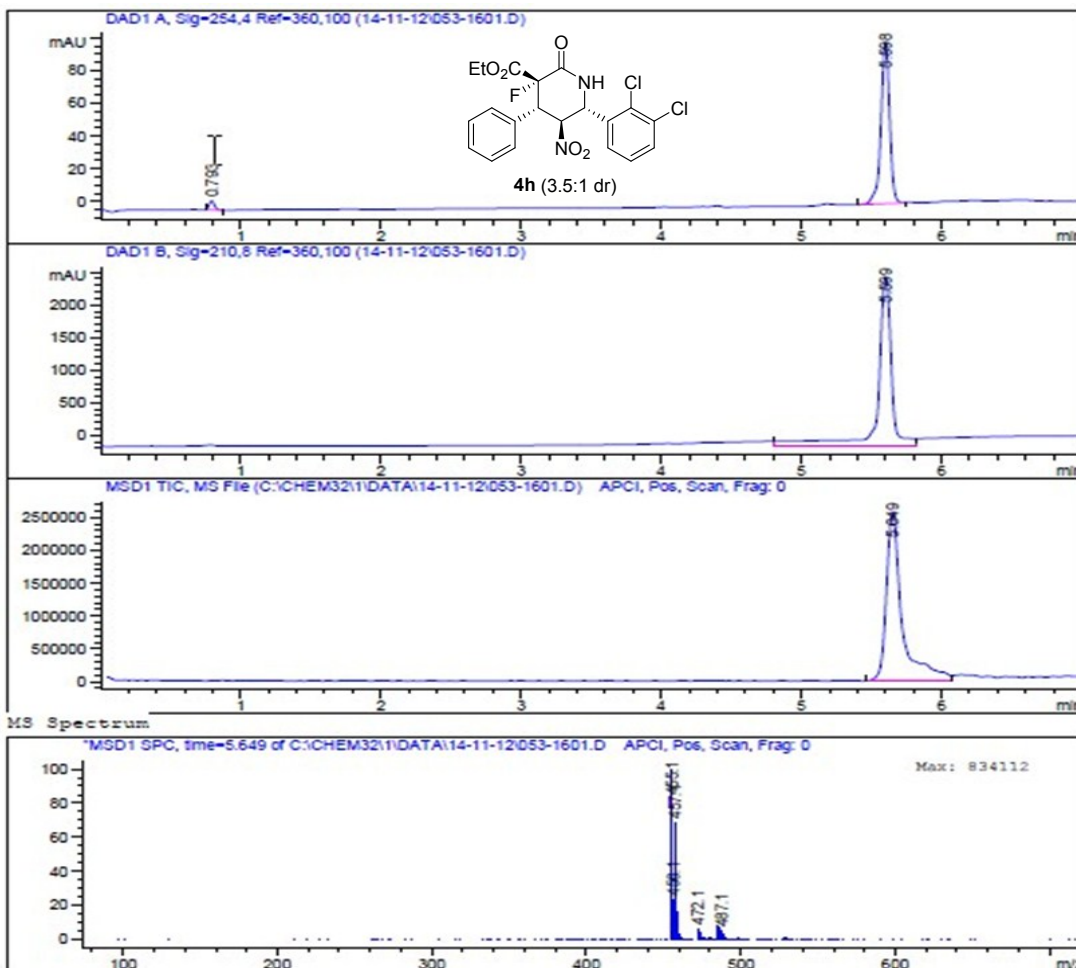

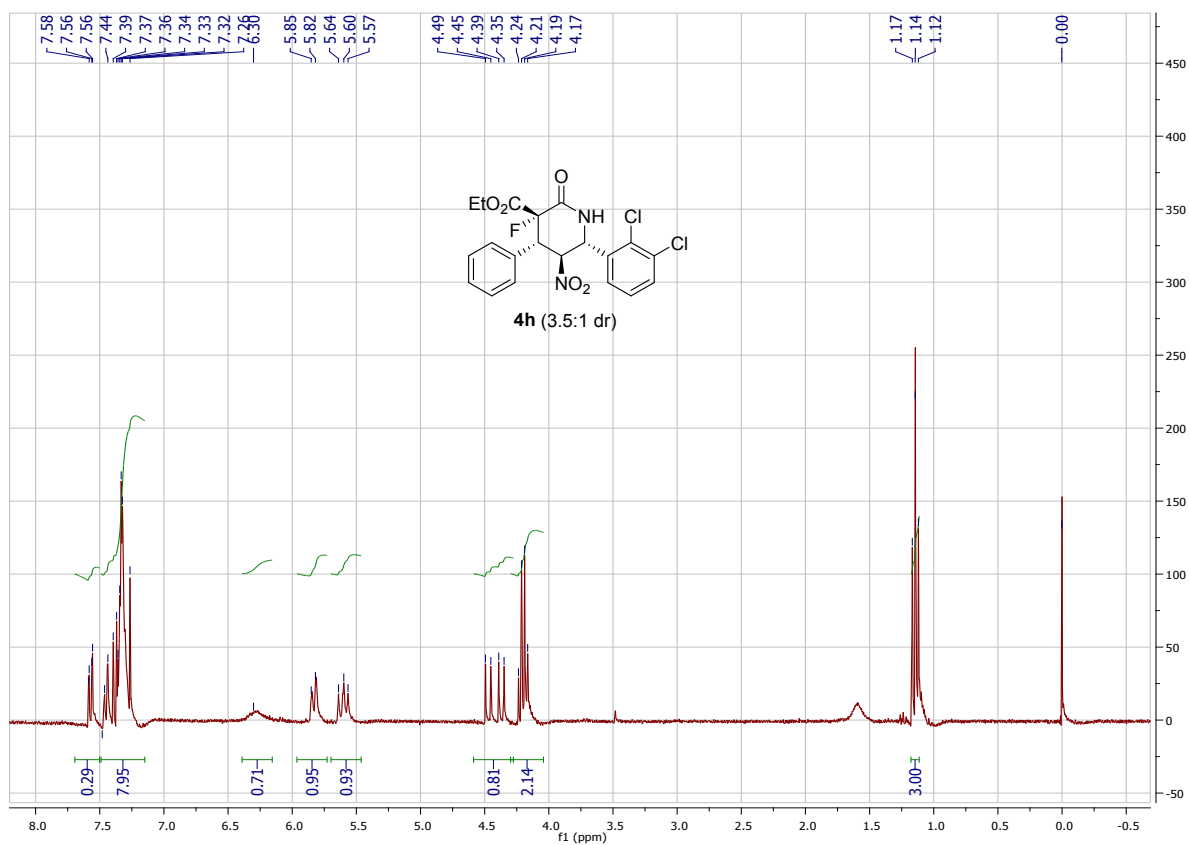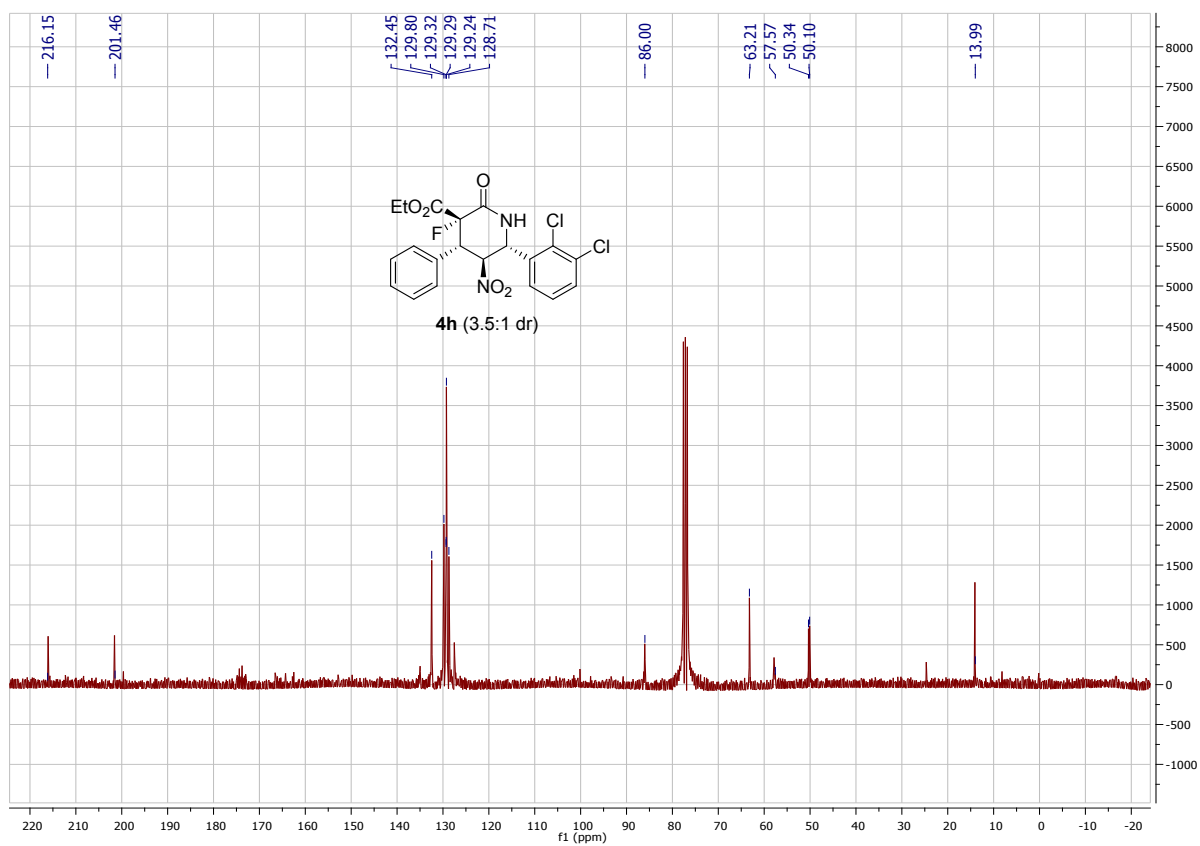

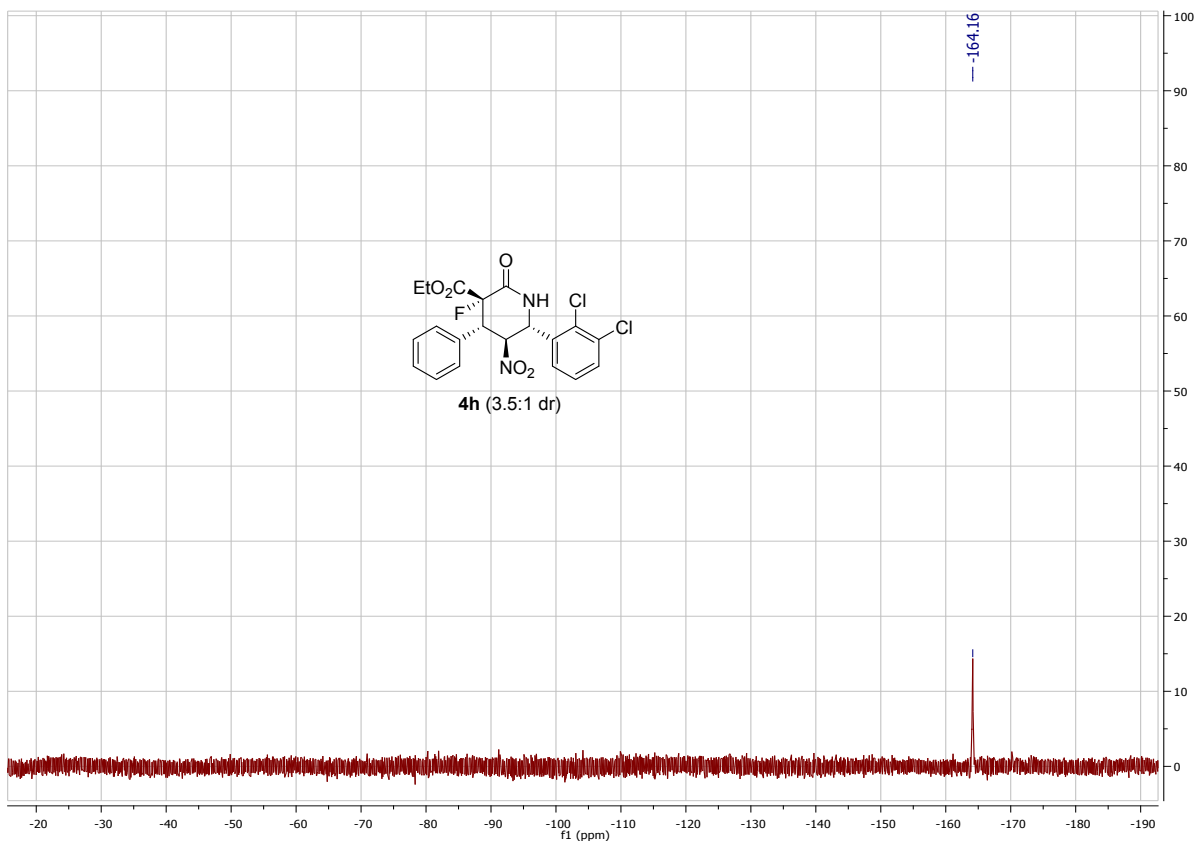

Current Chromatogram (s)

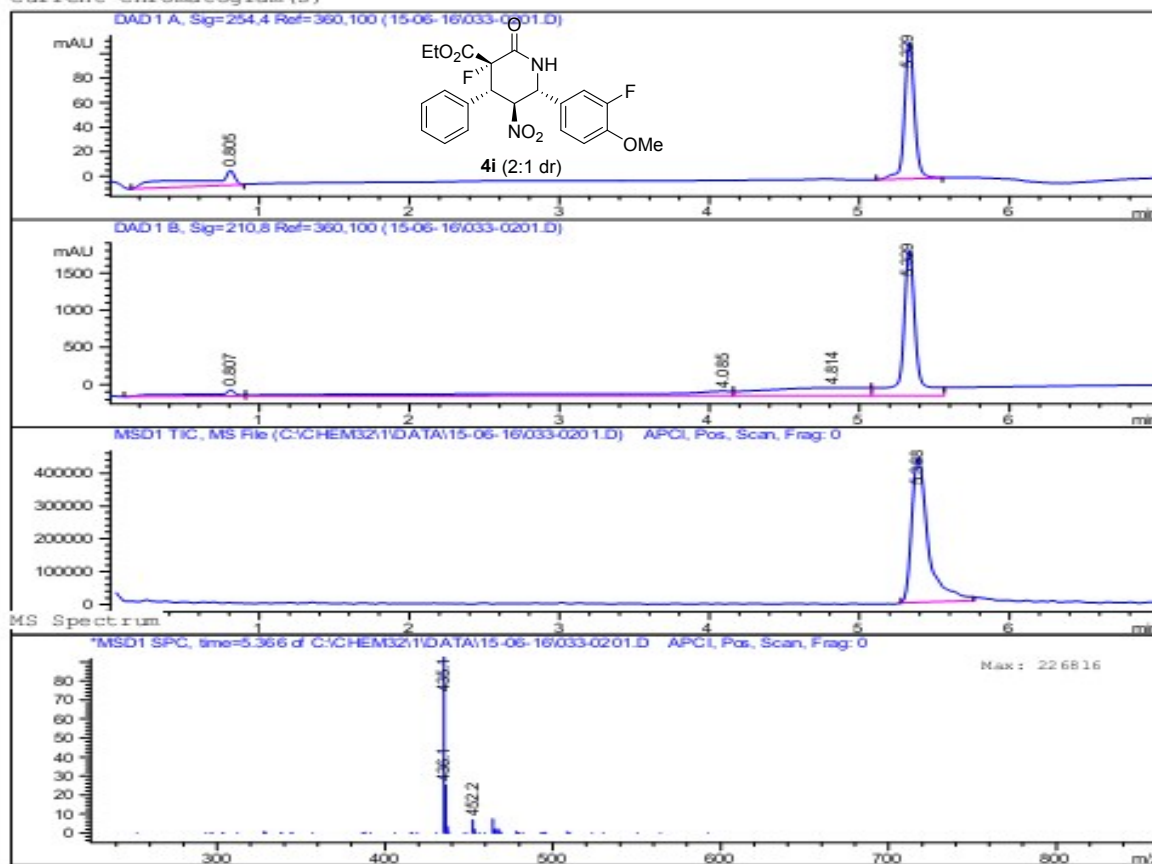

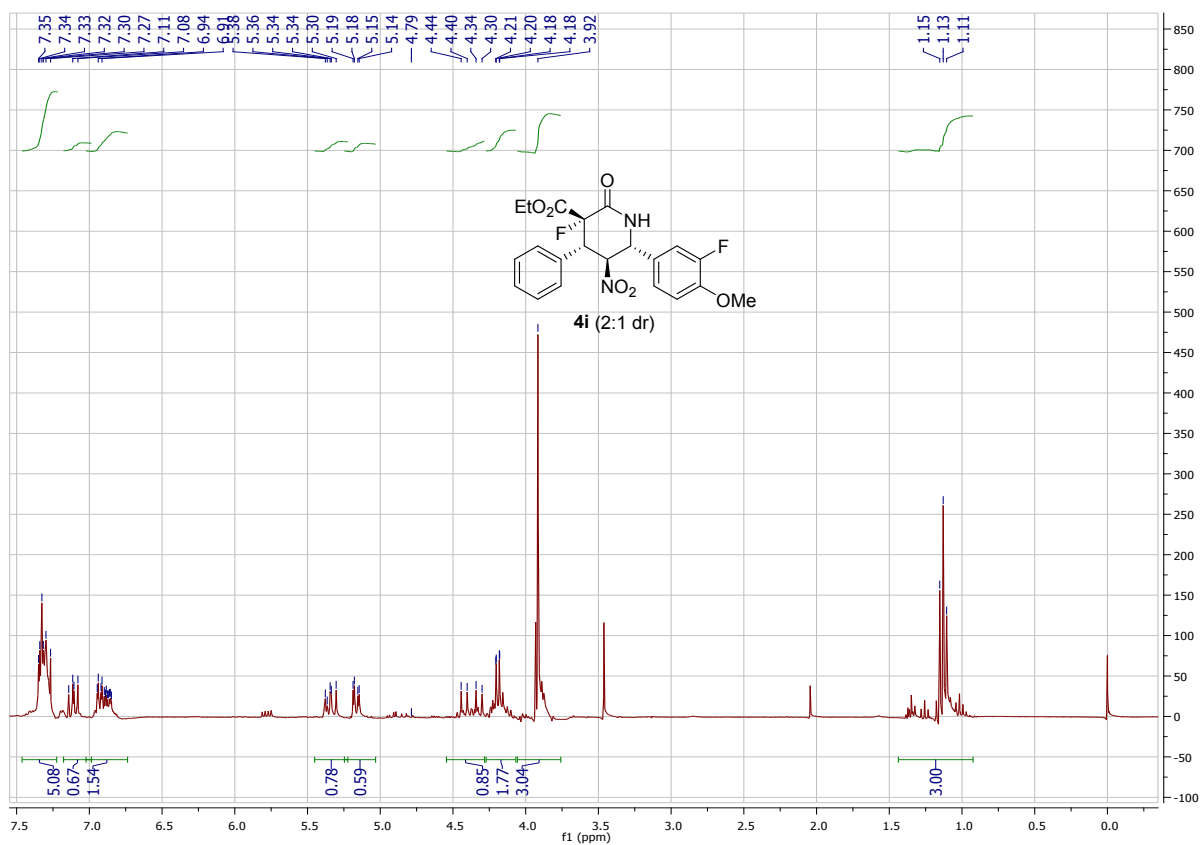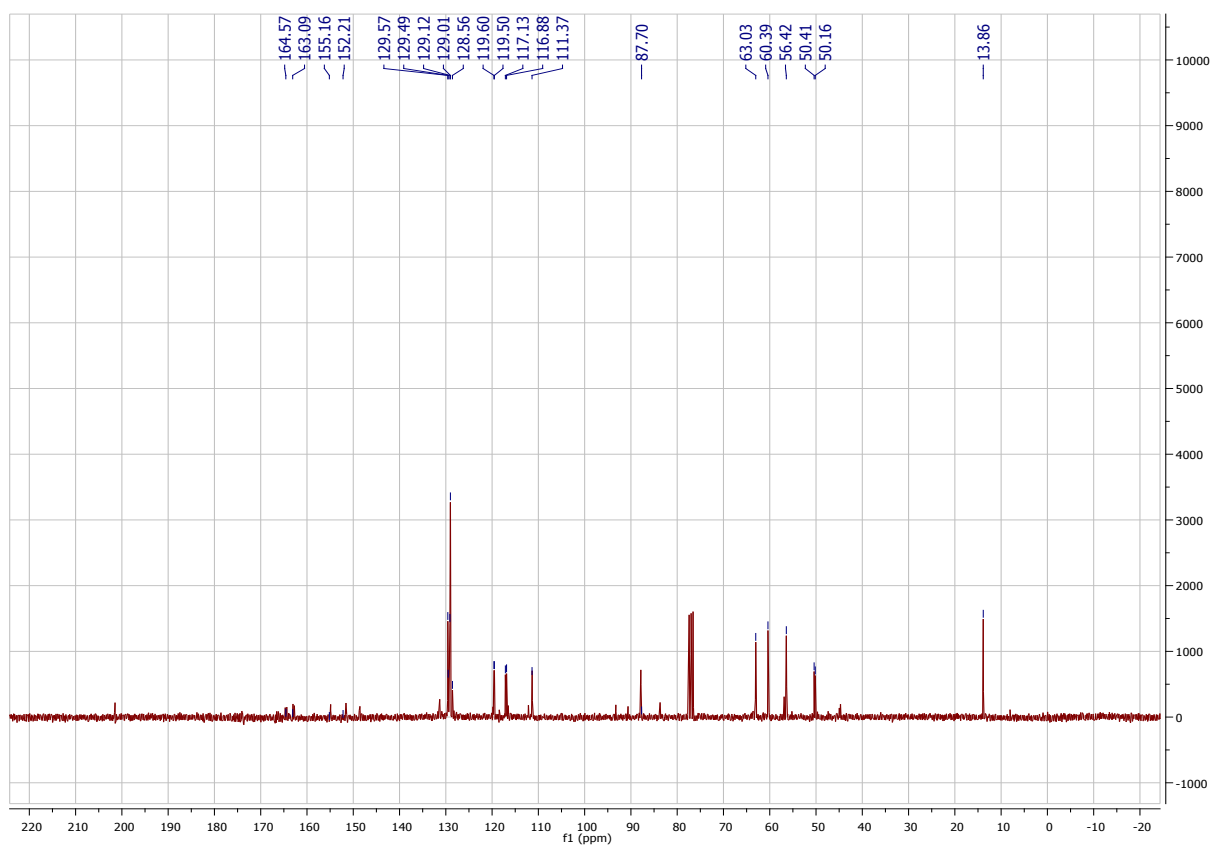

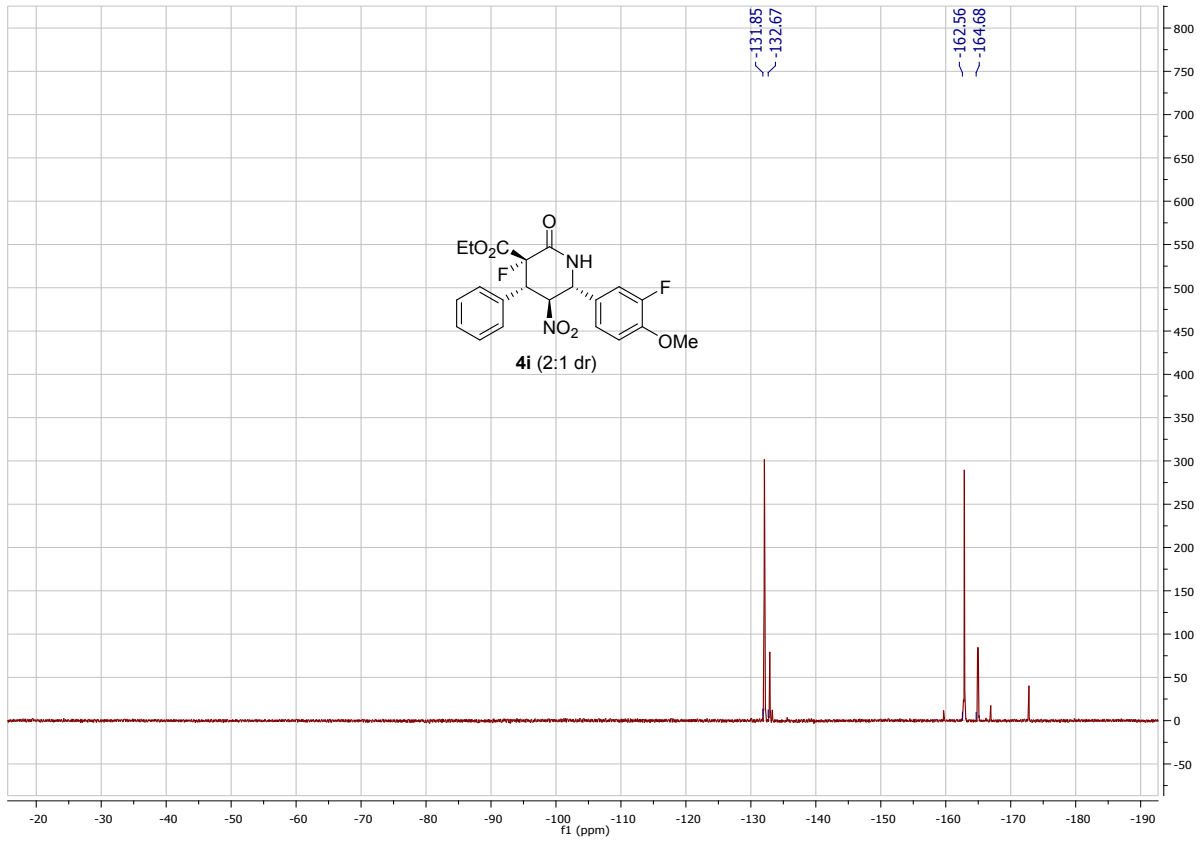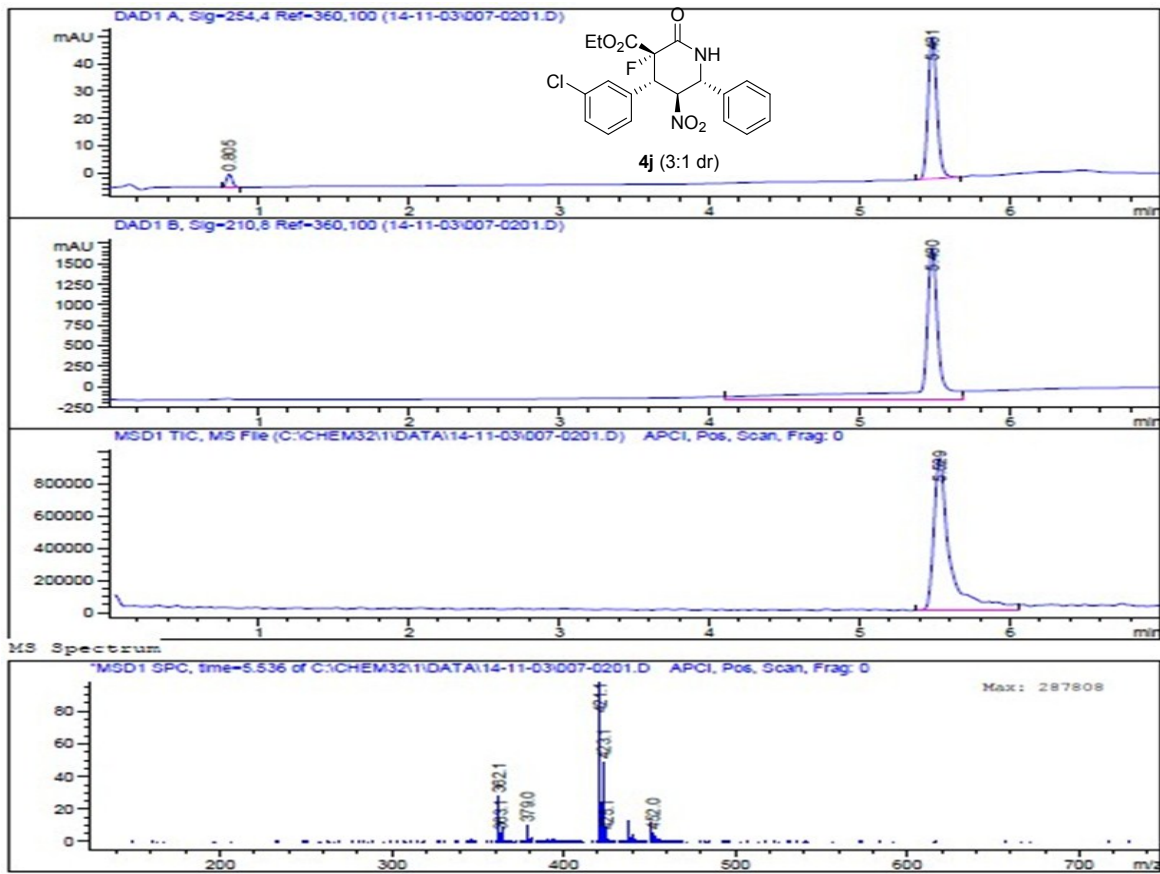

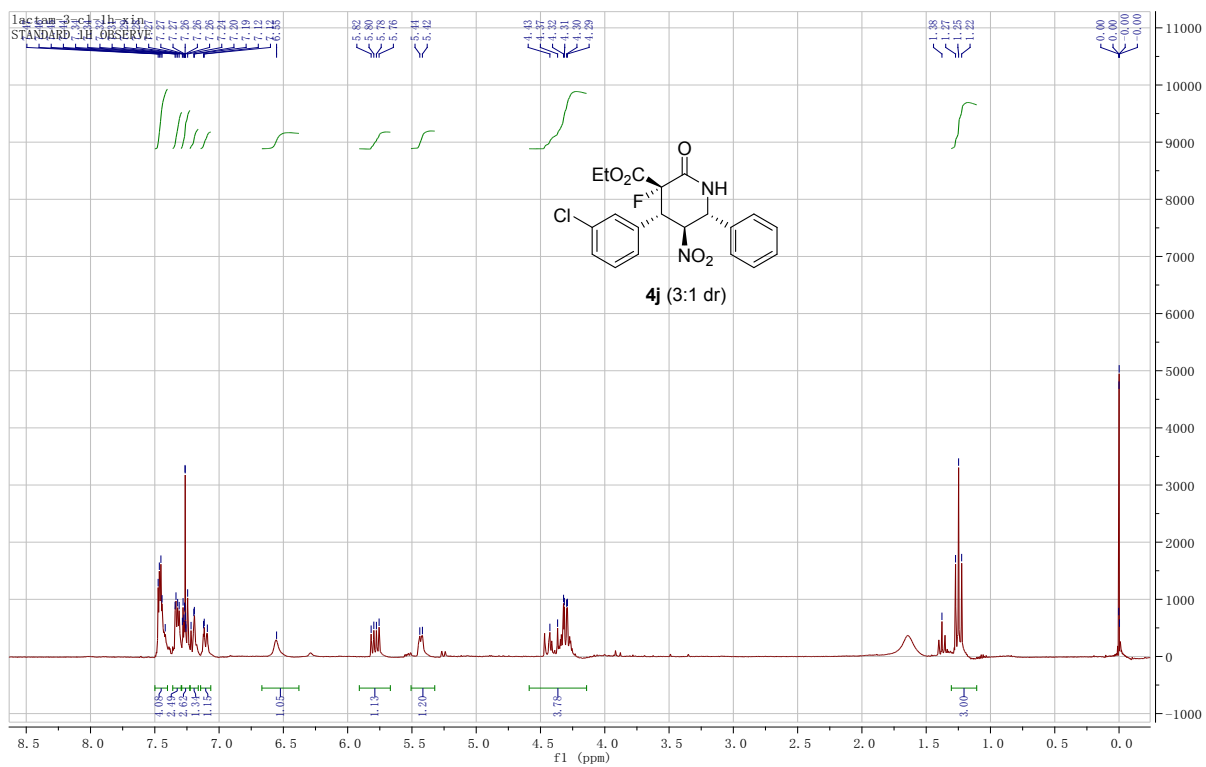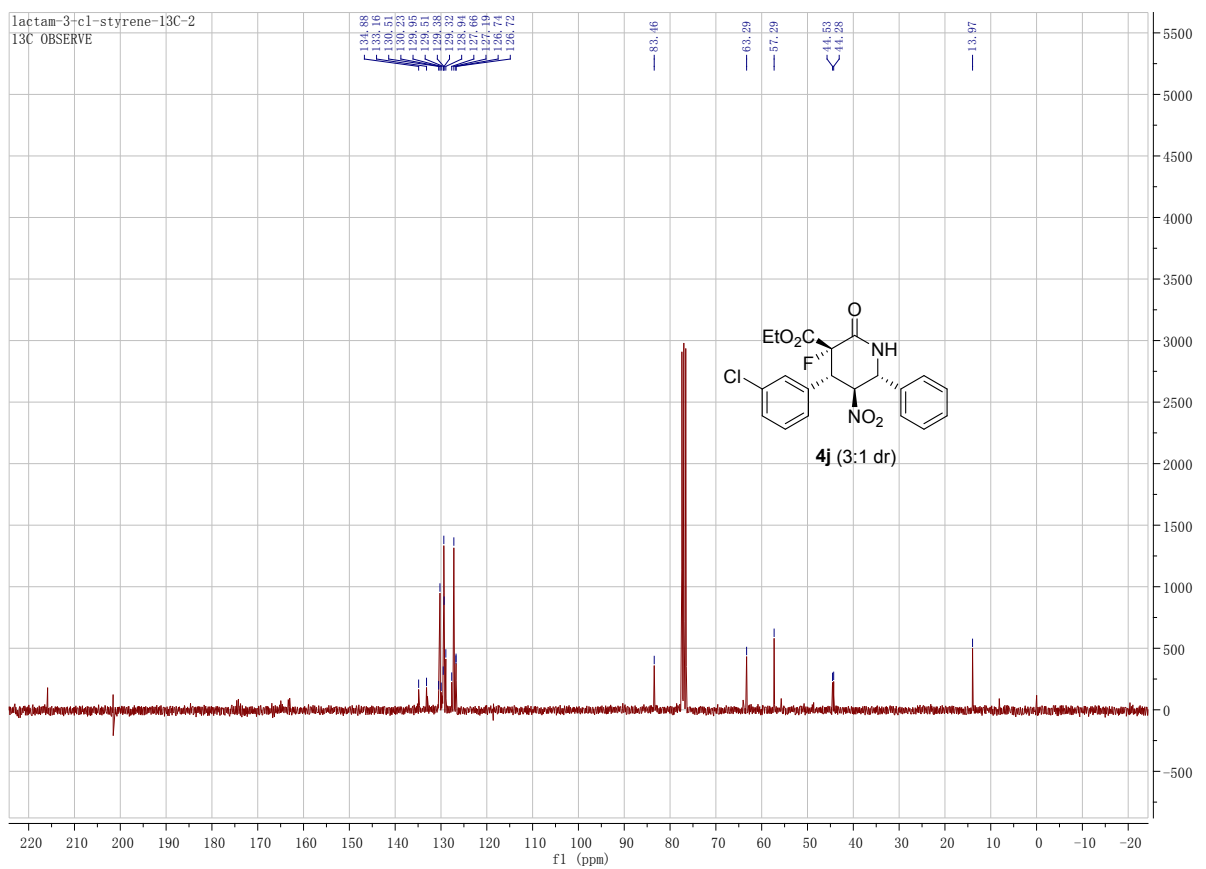



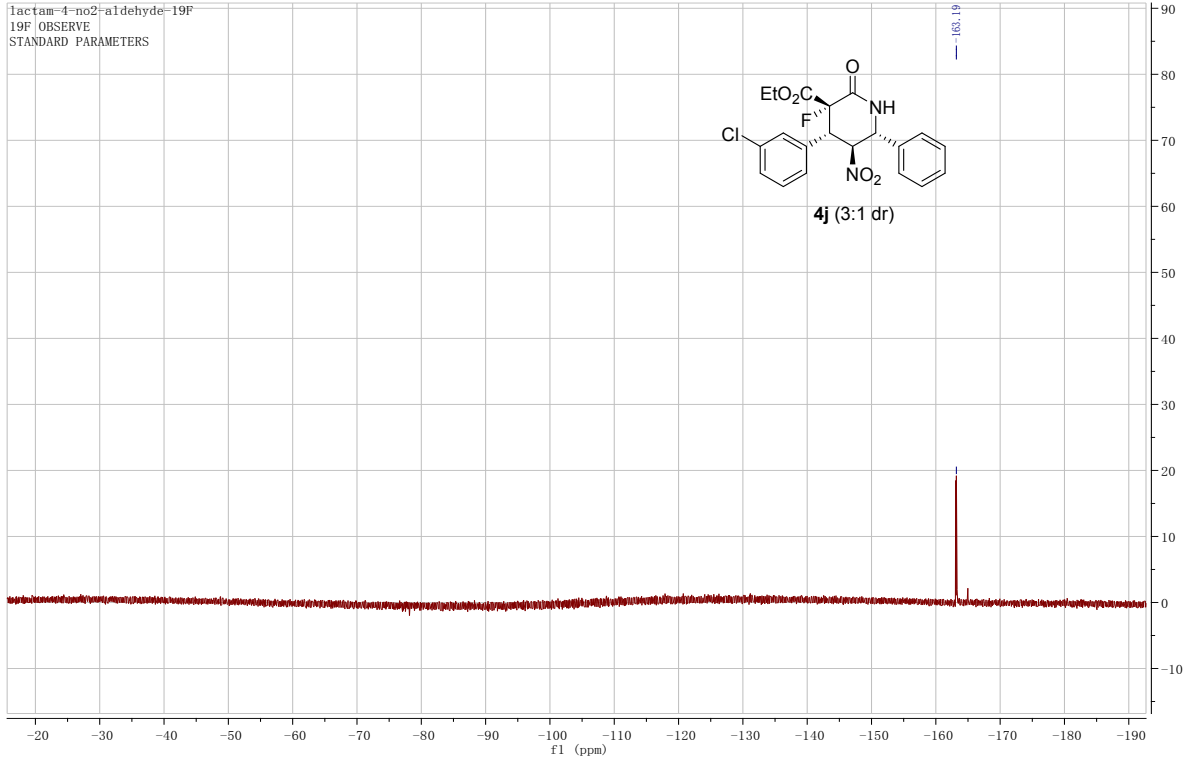

Current Chromatogram(s)

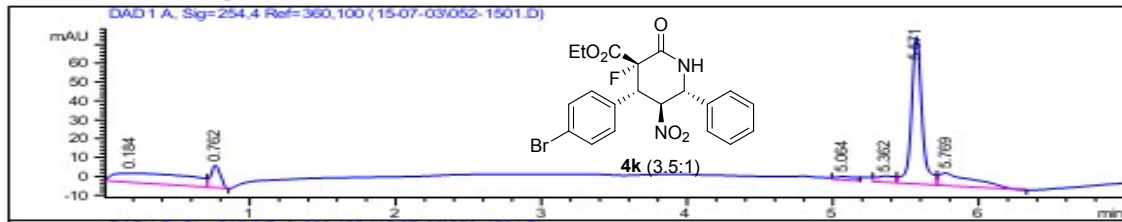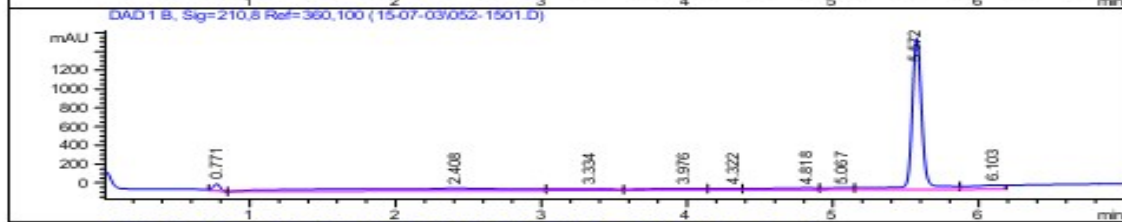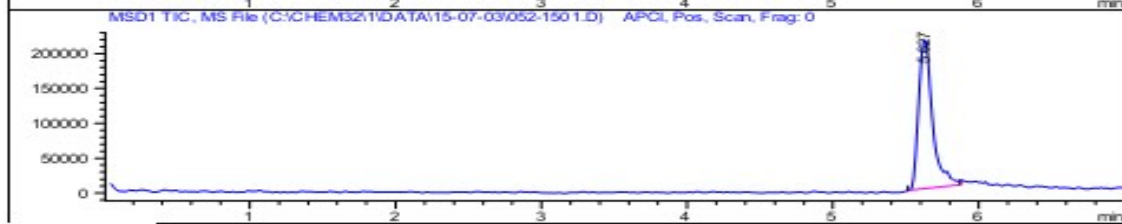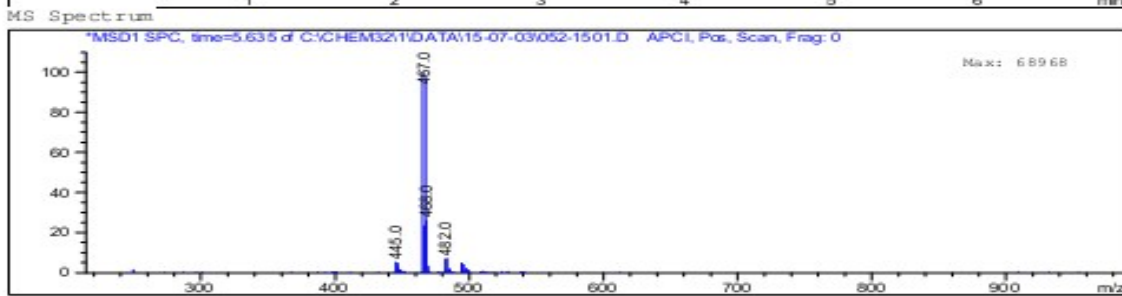

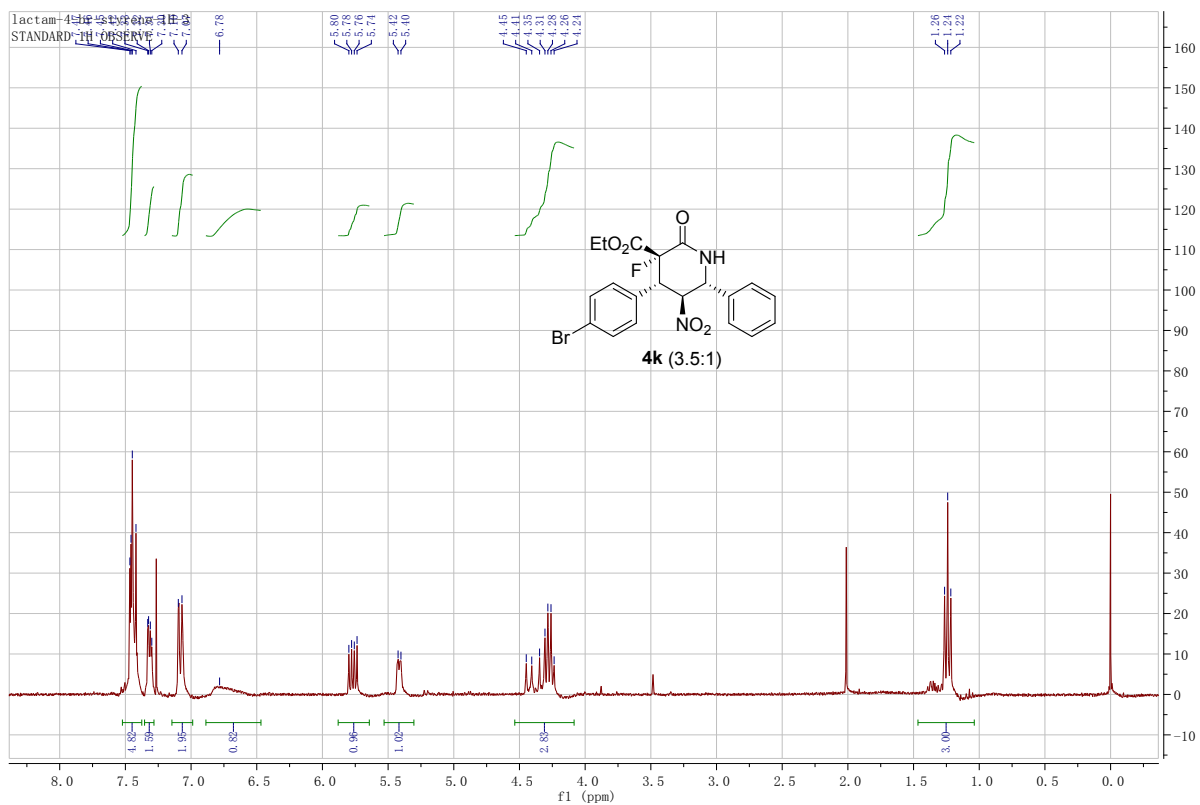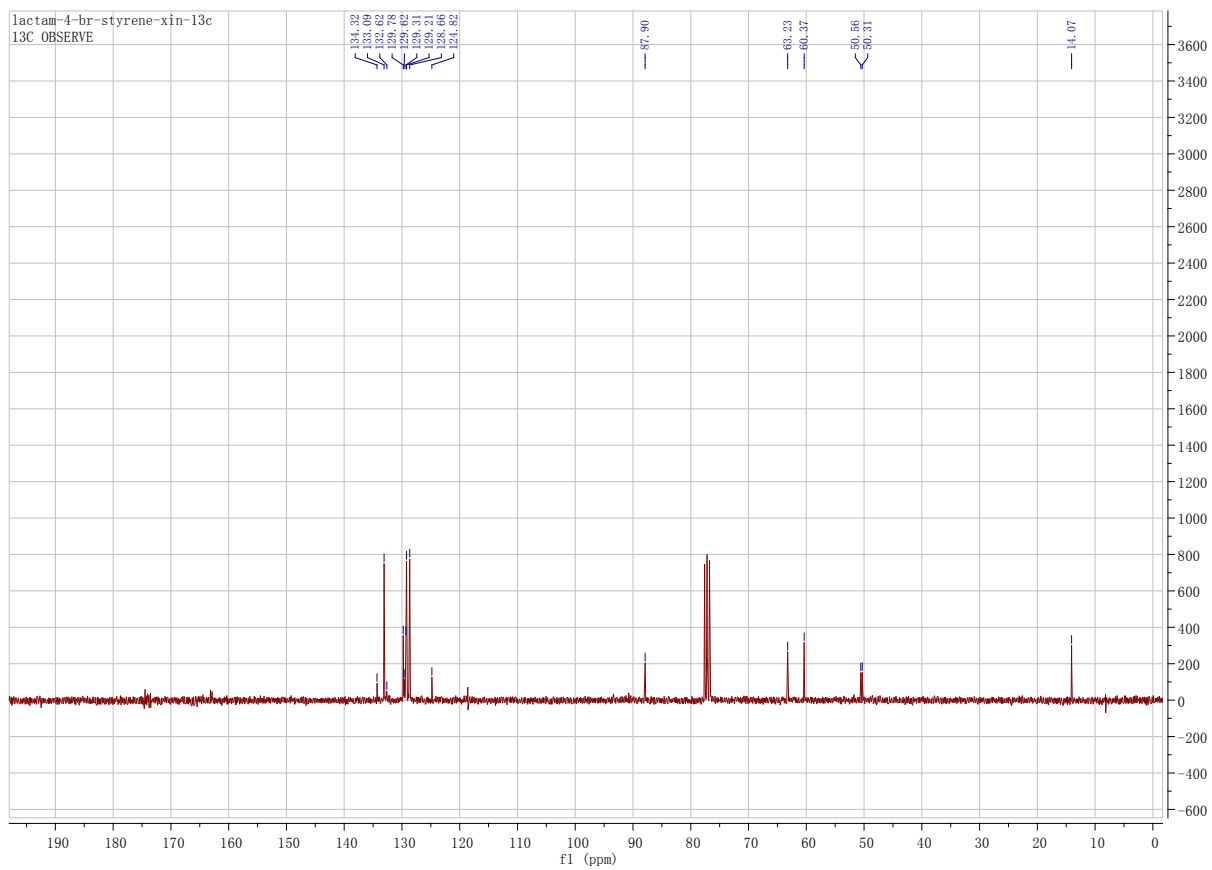

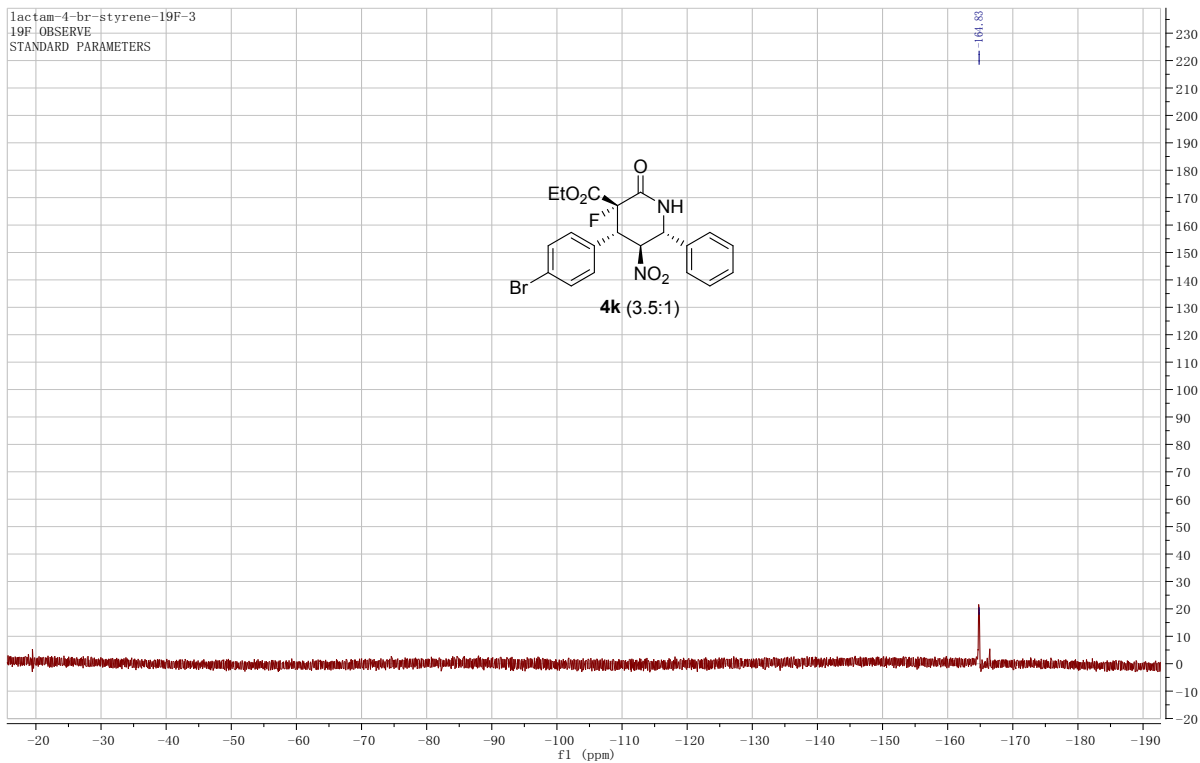

Current Chromatogram (s)

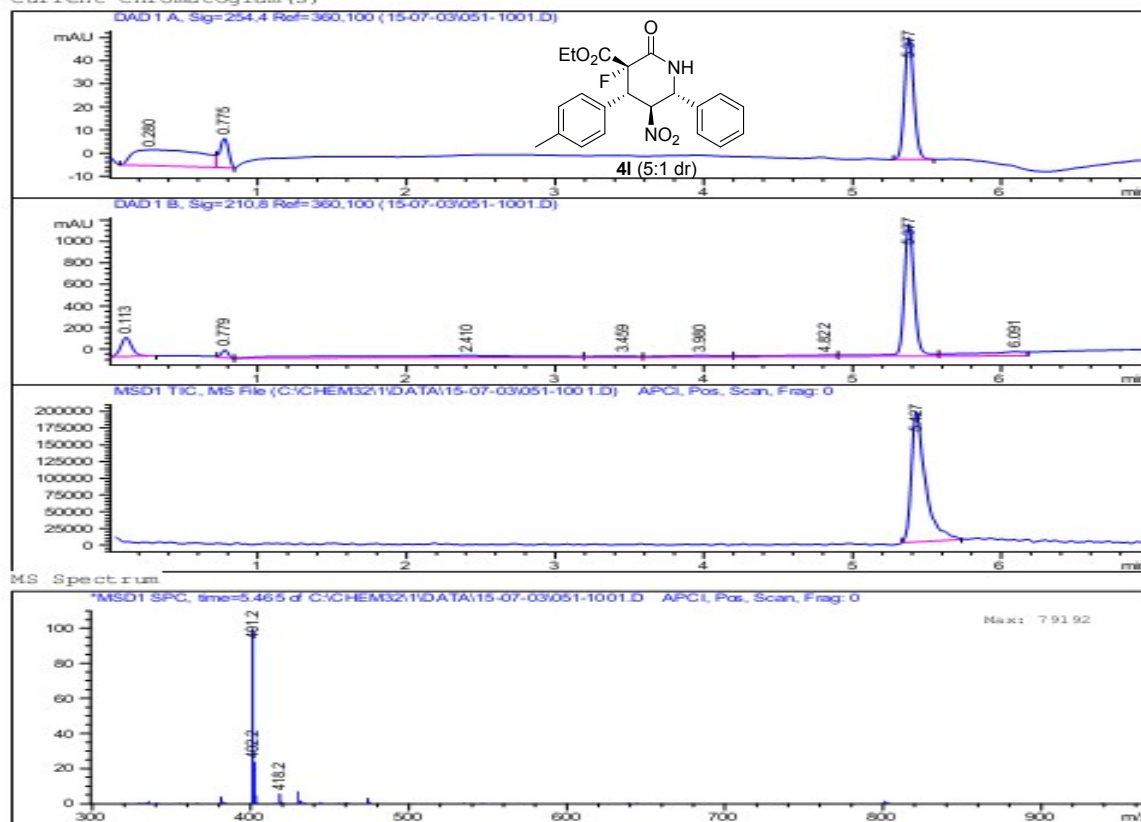

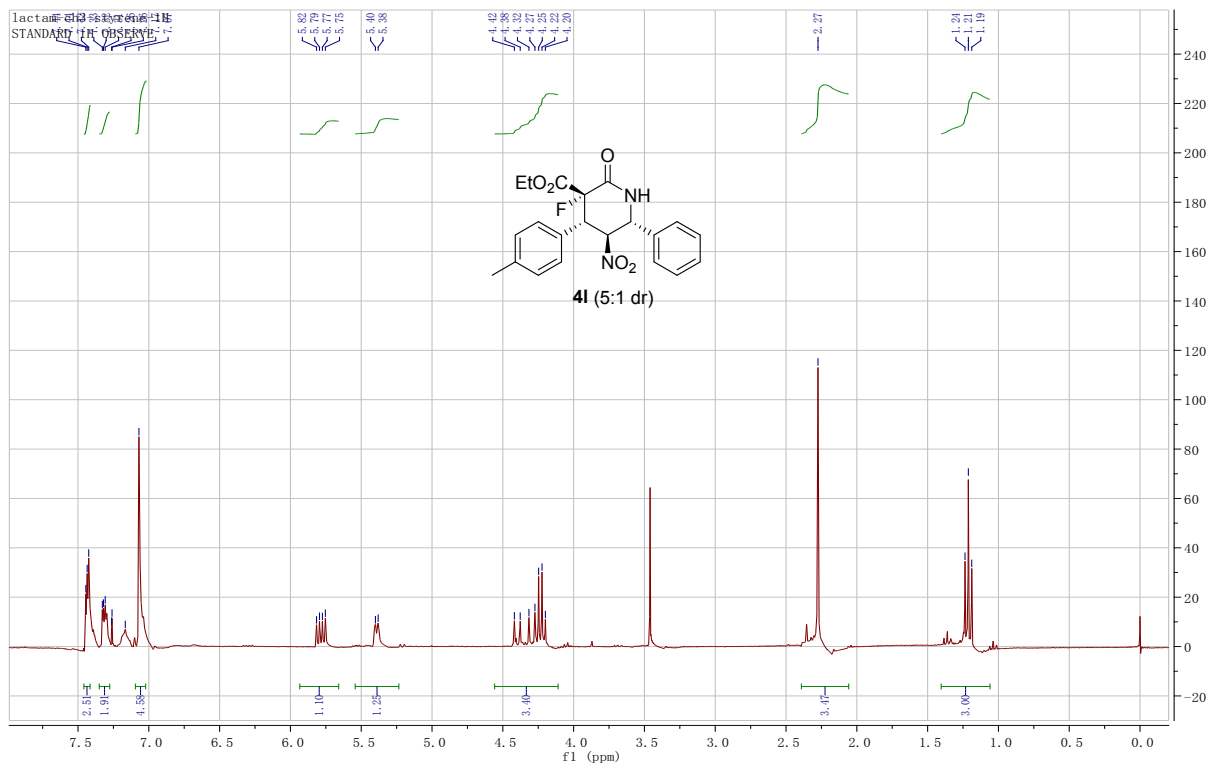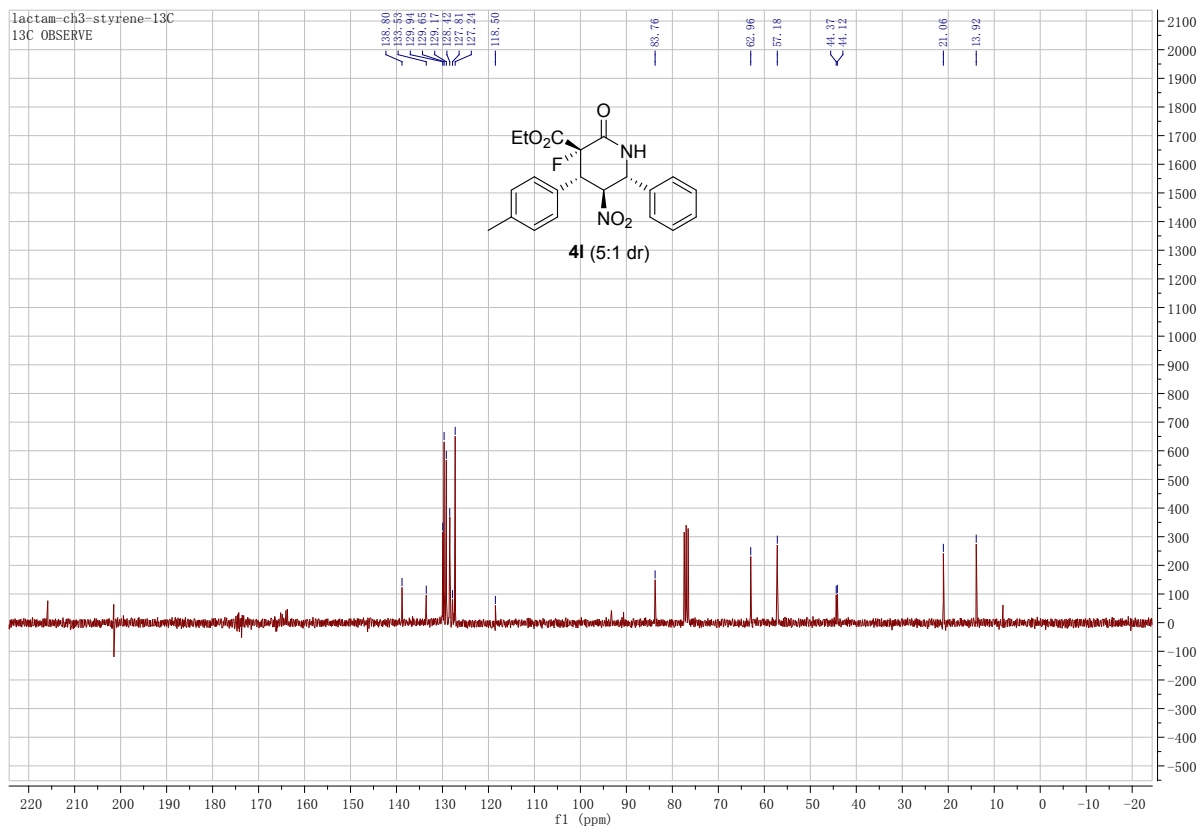

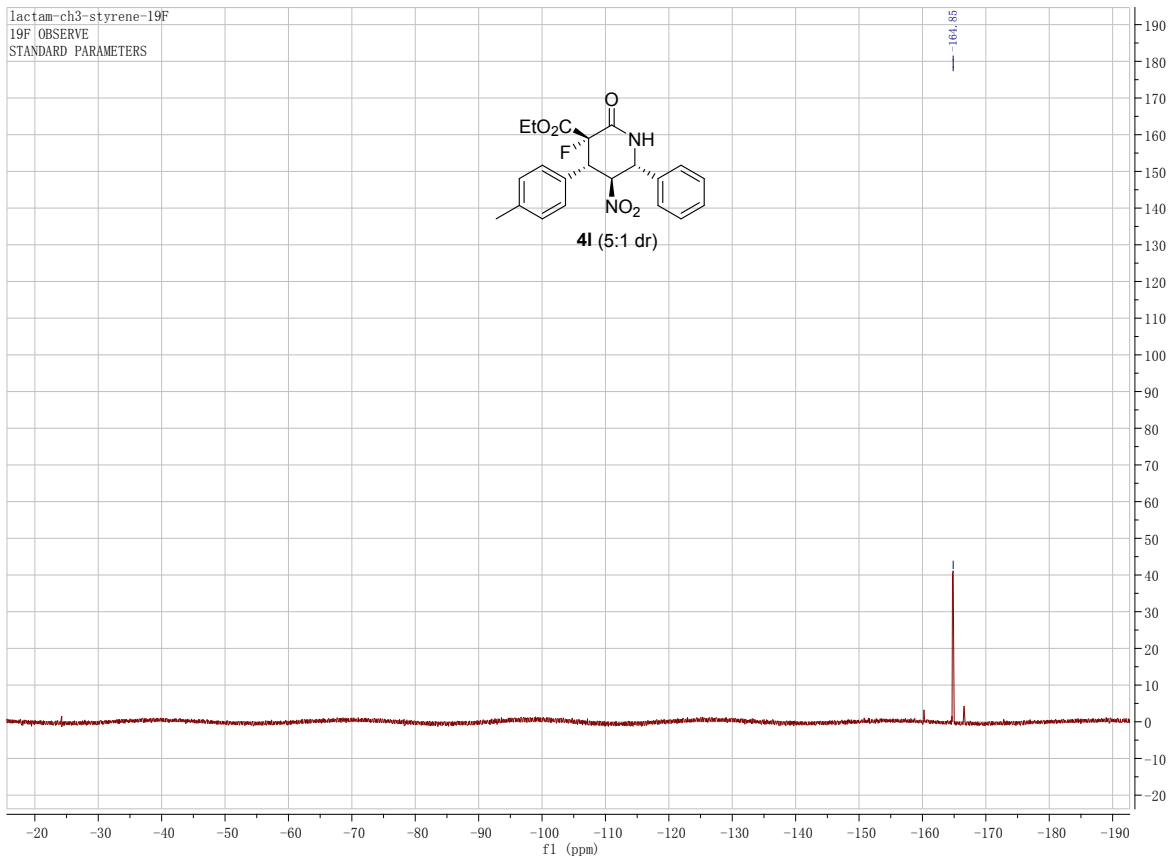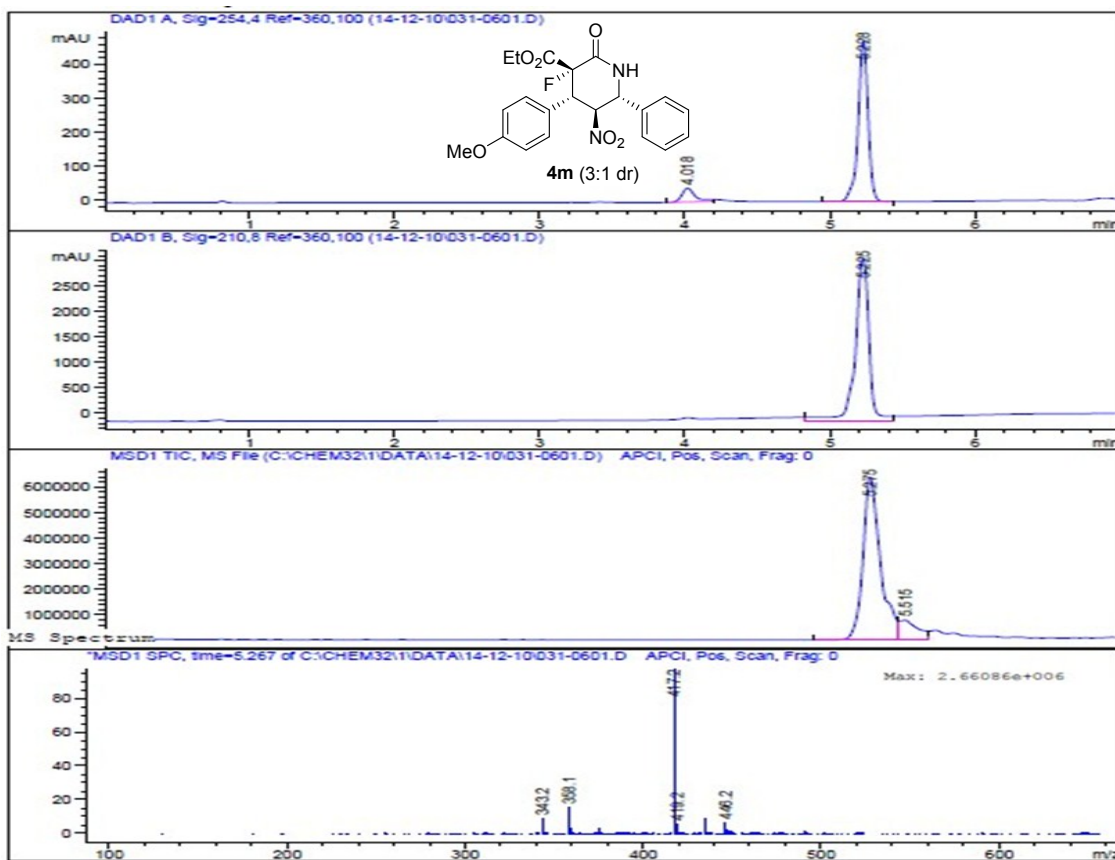

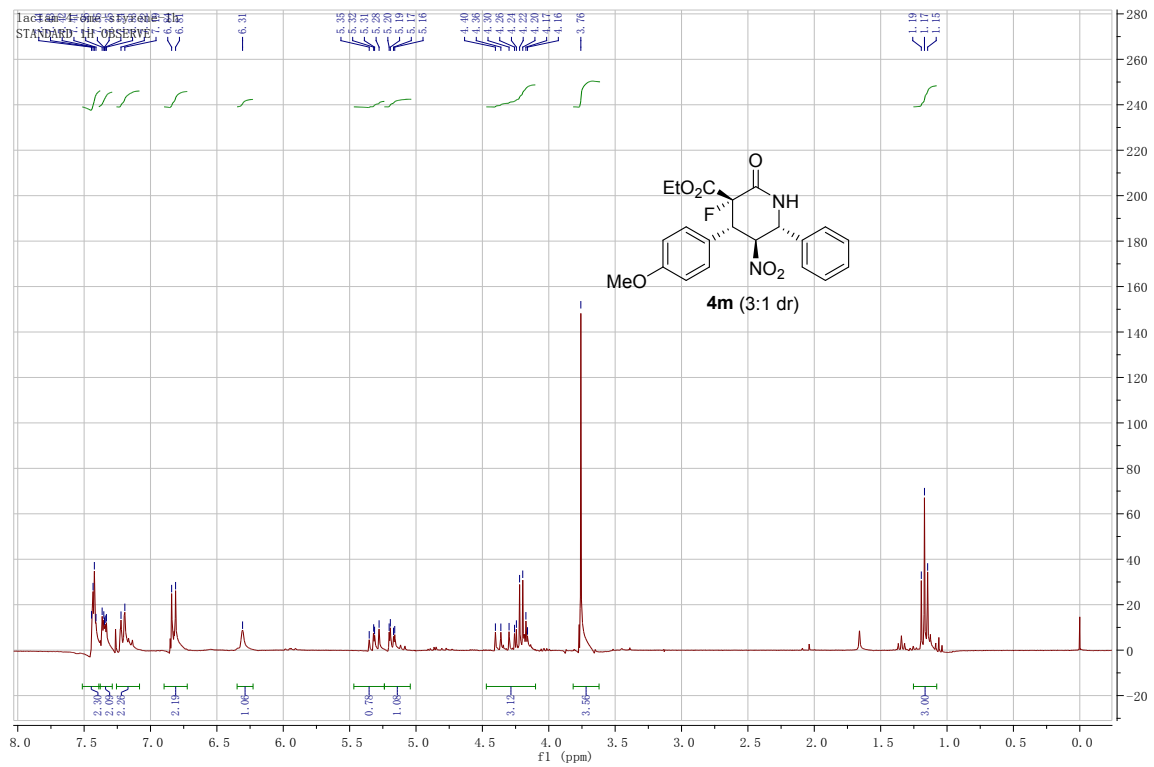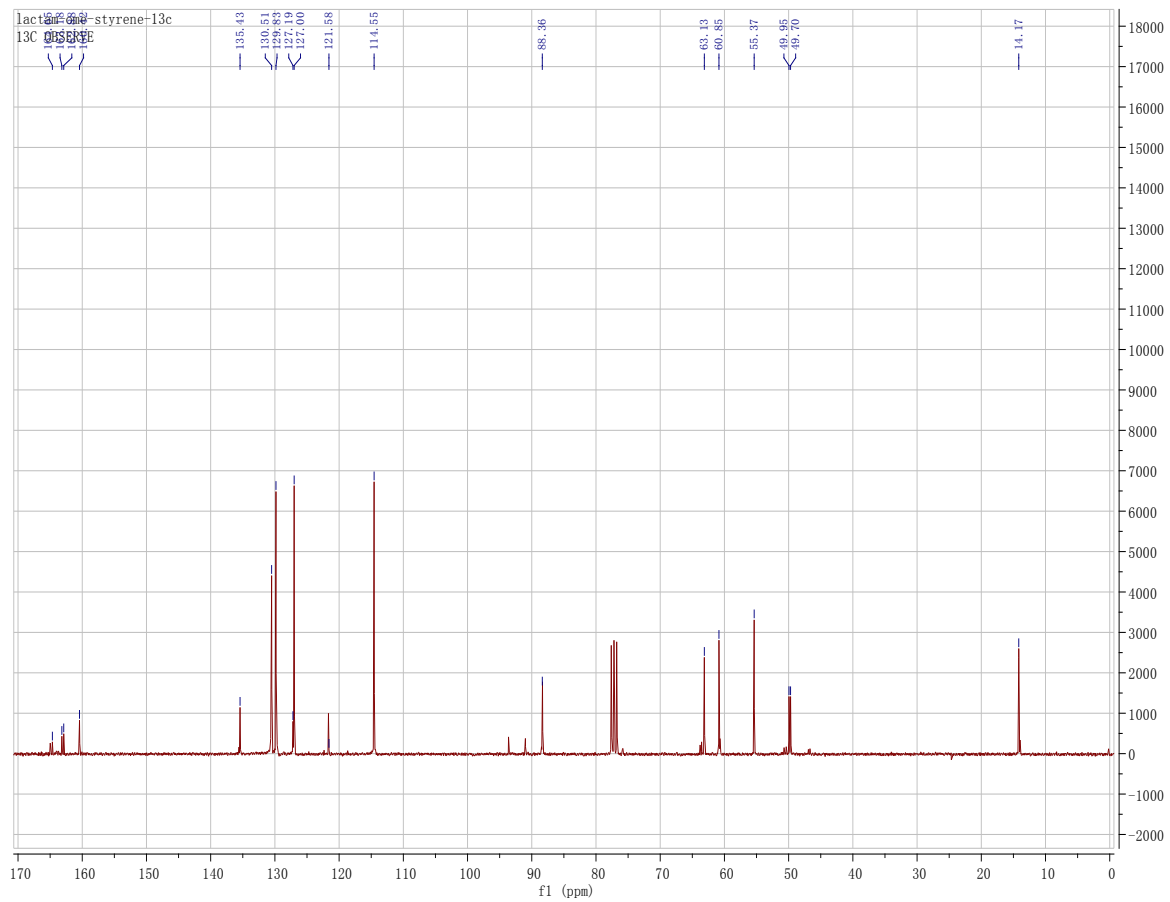

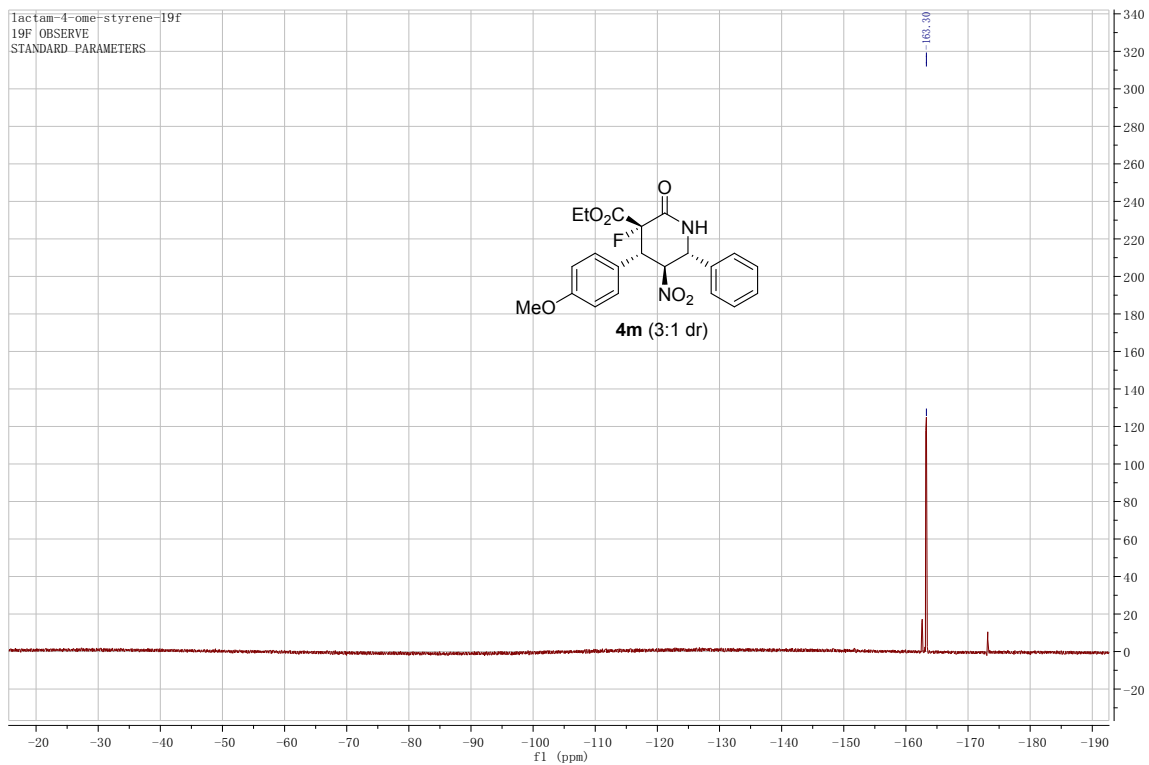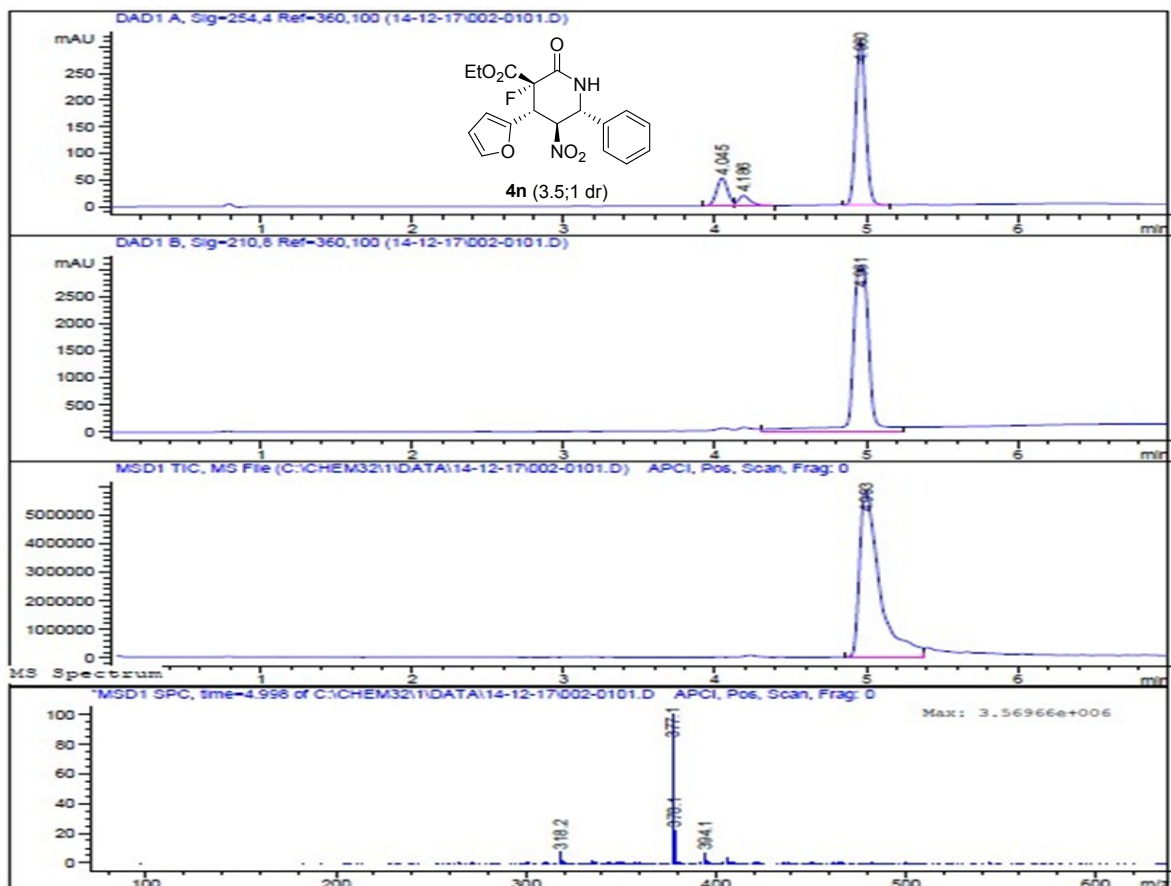

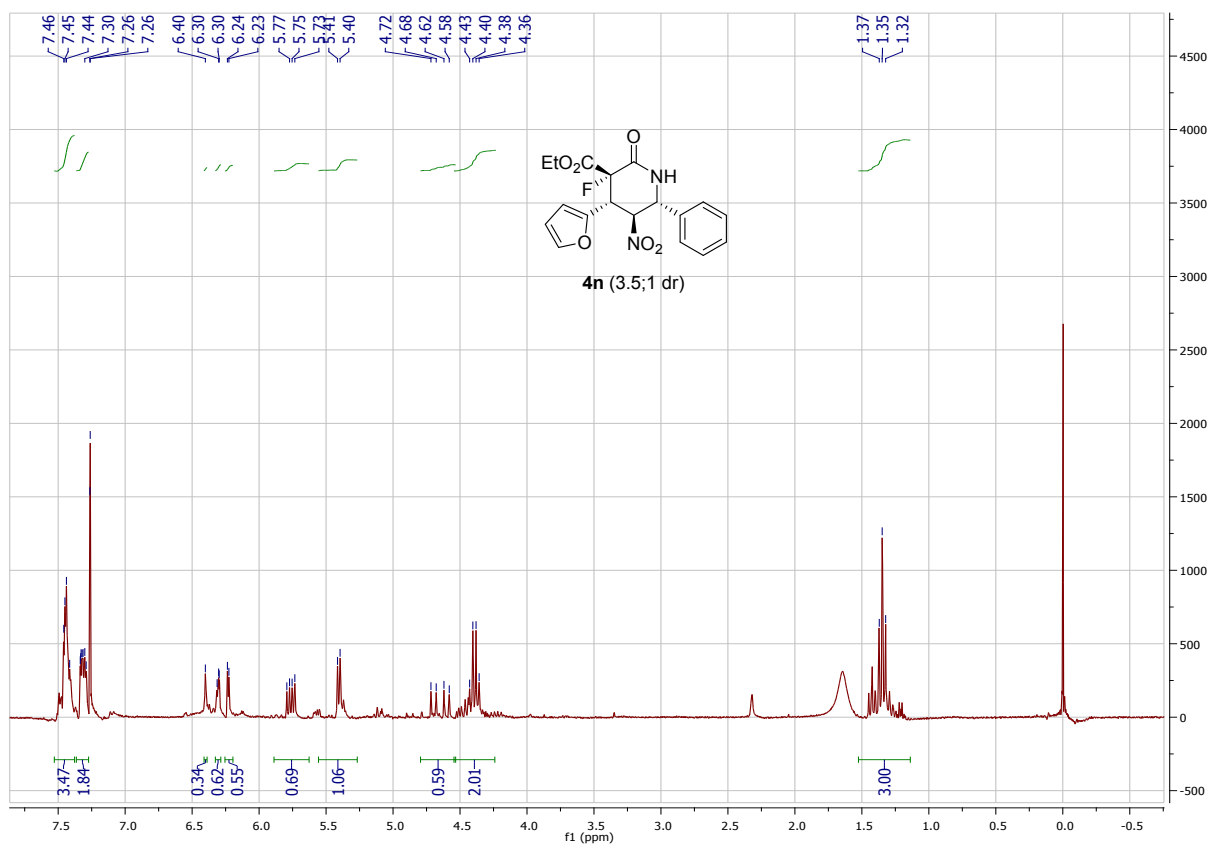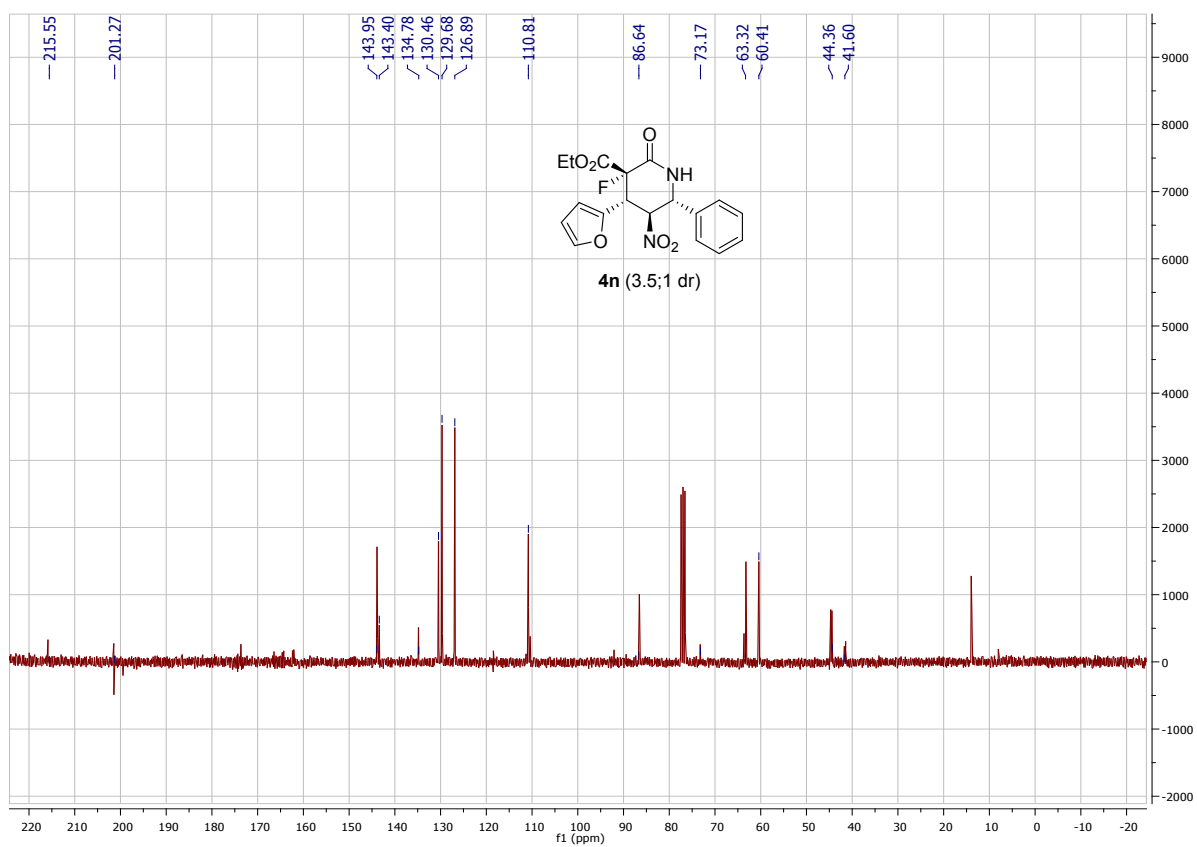



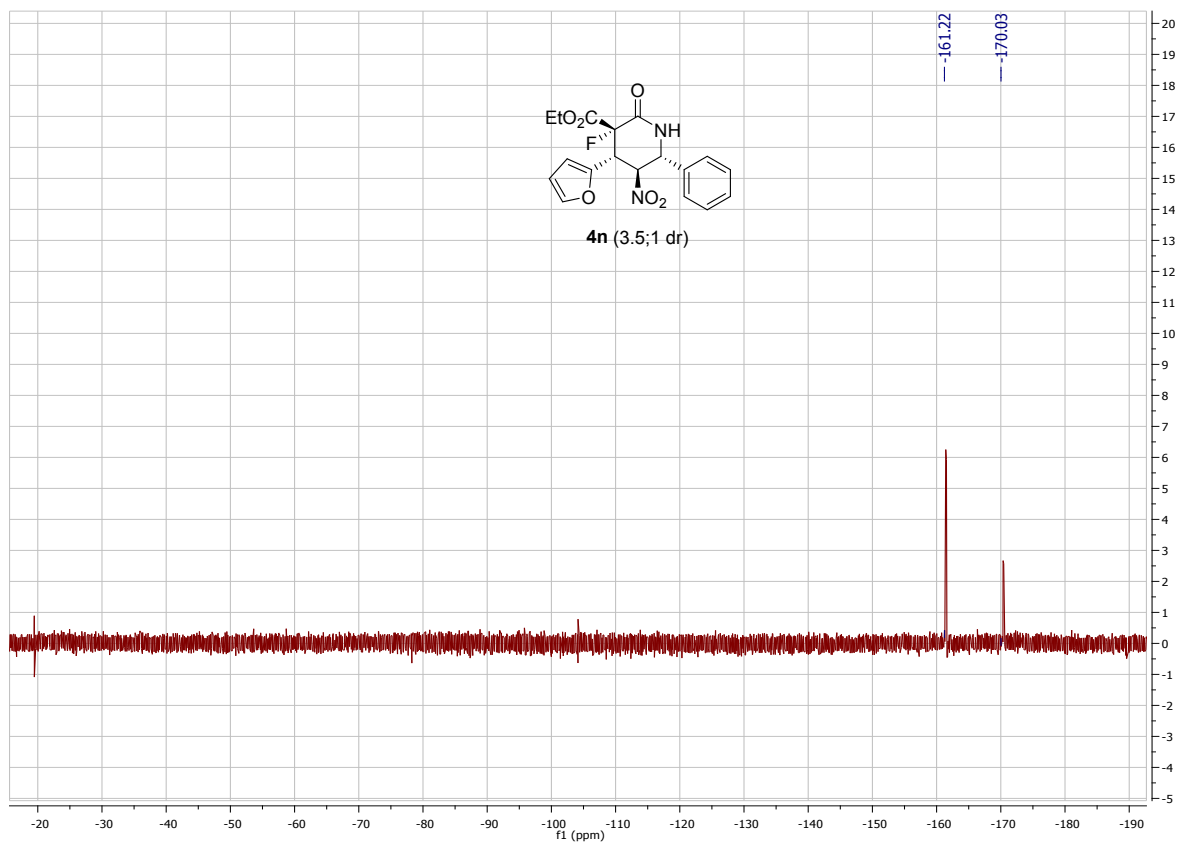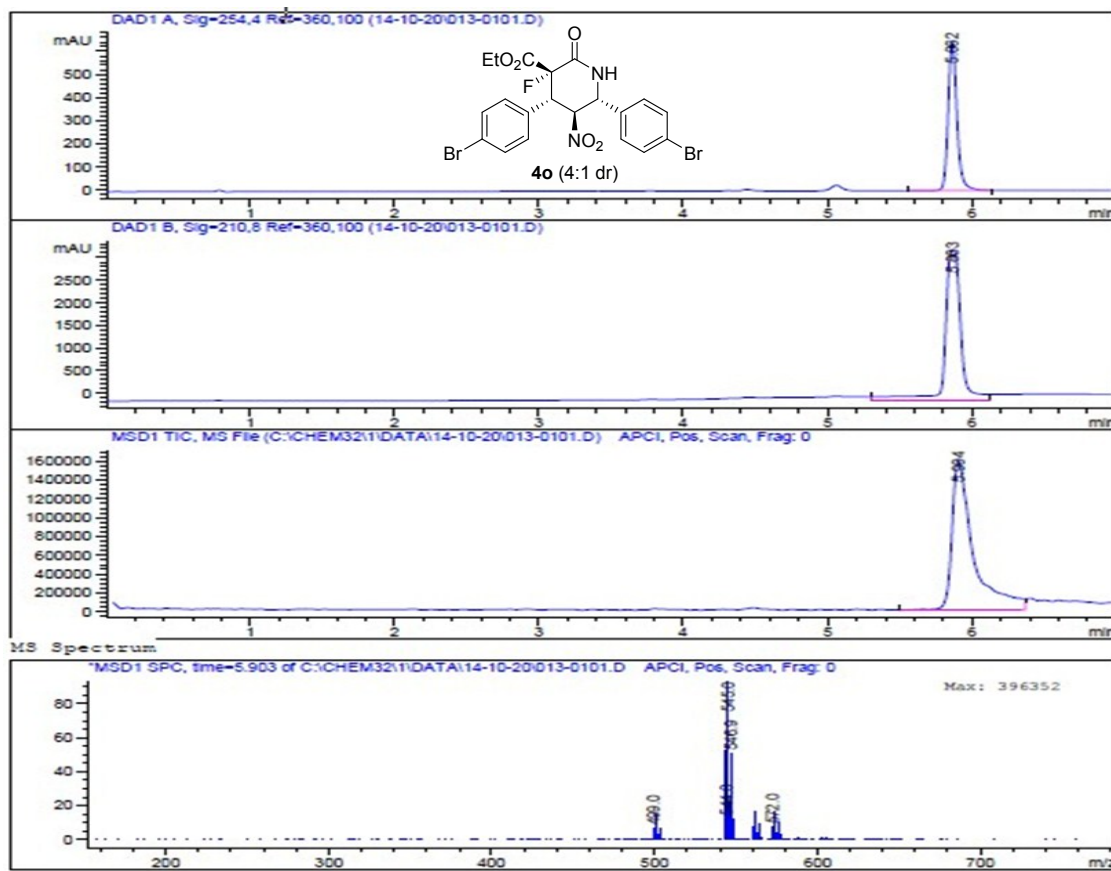

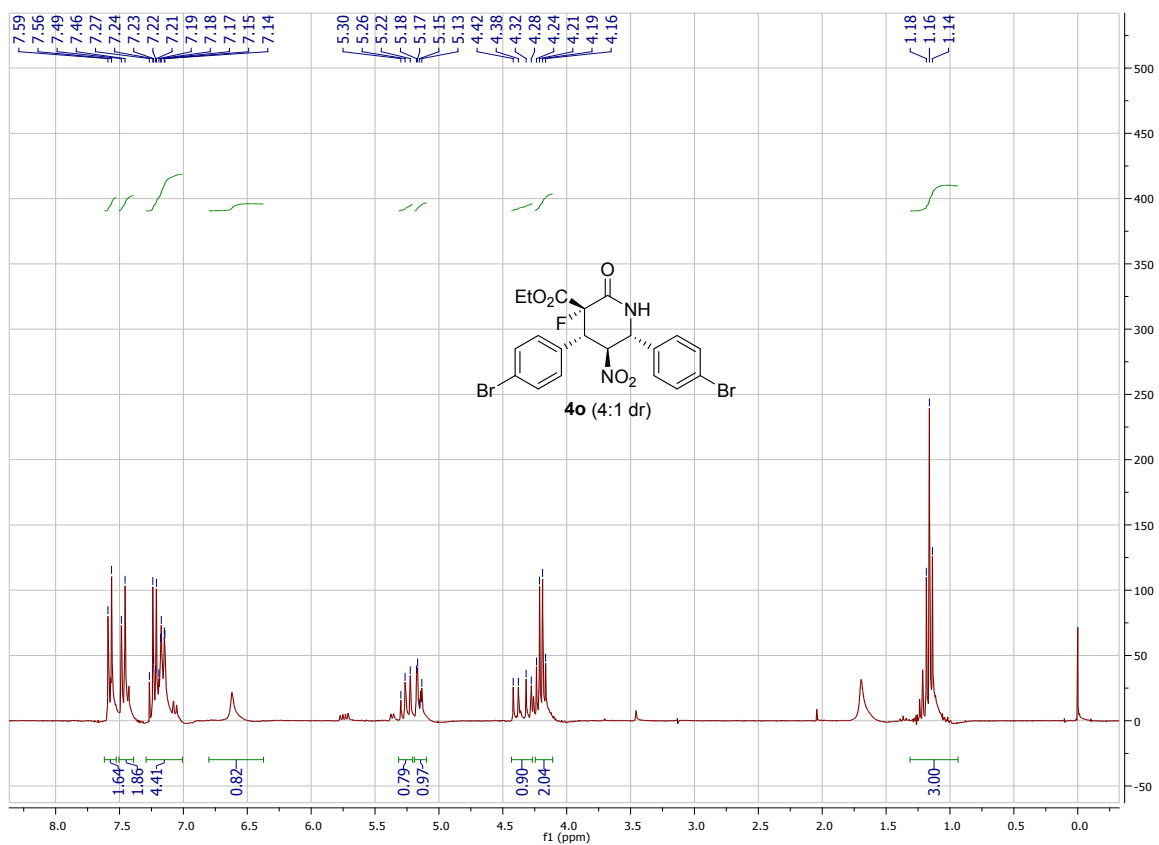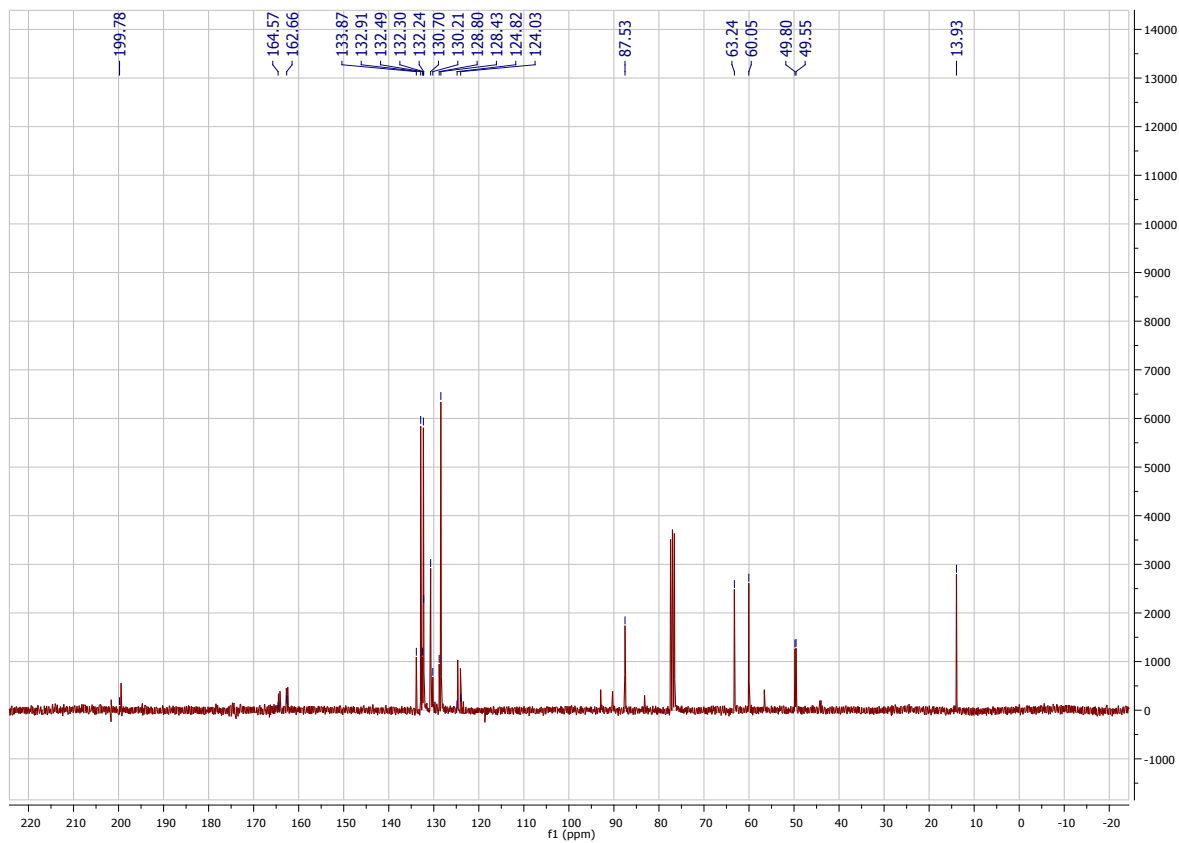

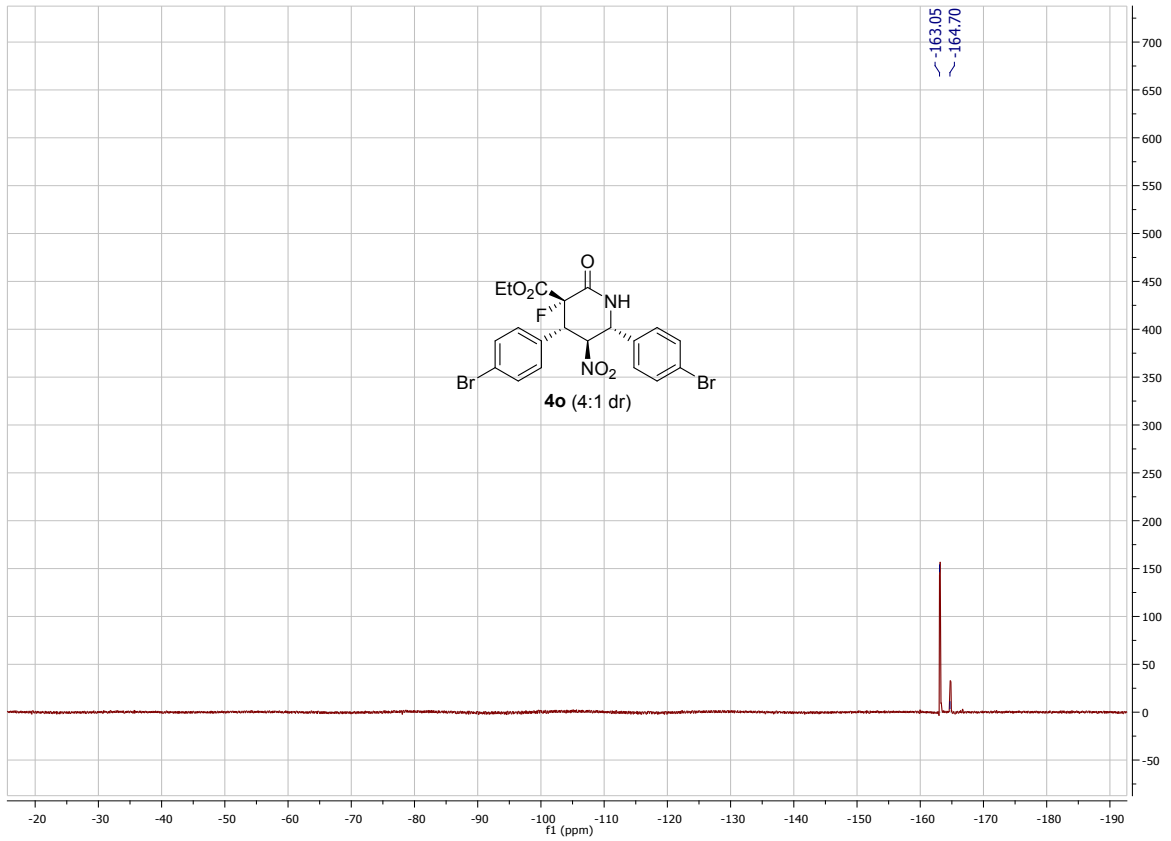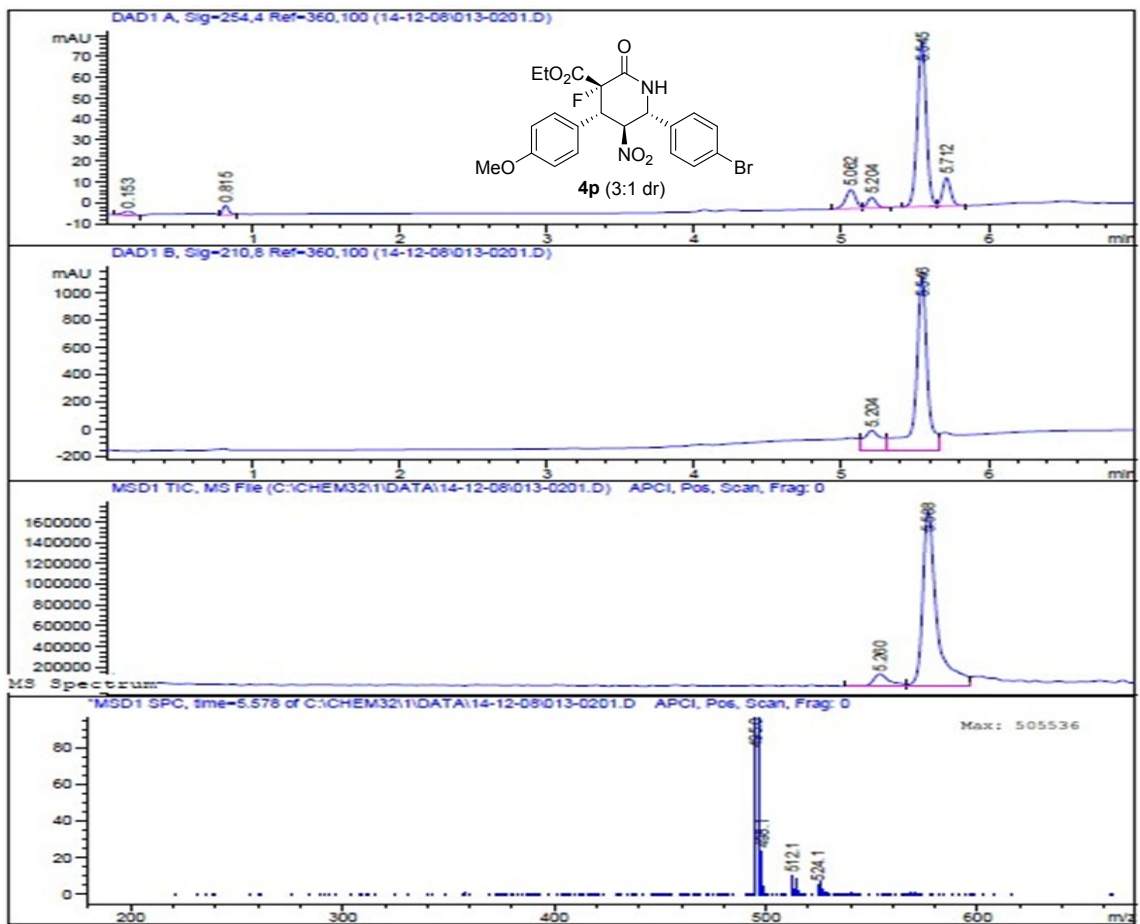

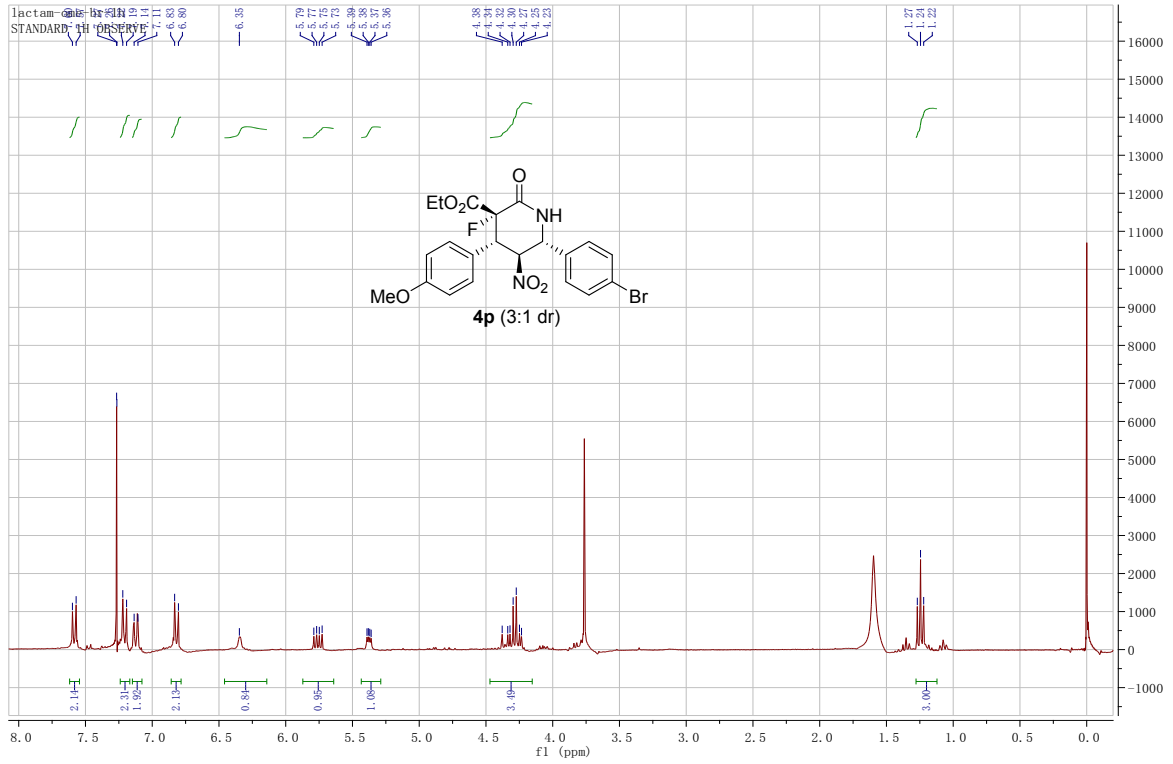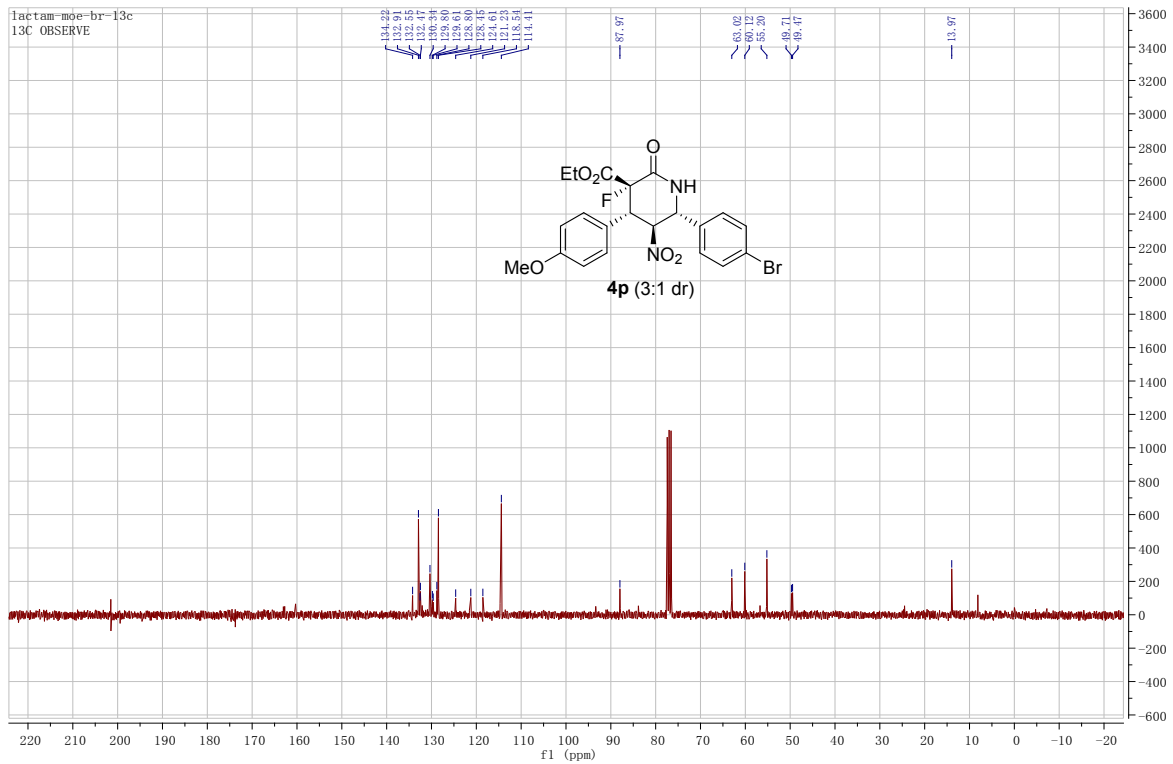

lactam-ome-br-19f  
19F OBSERVE  
STANDARD PARAMETERS

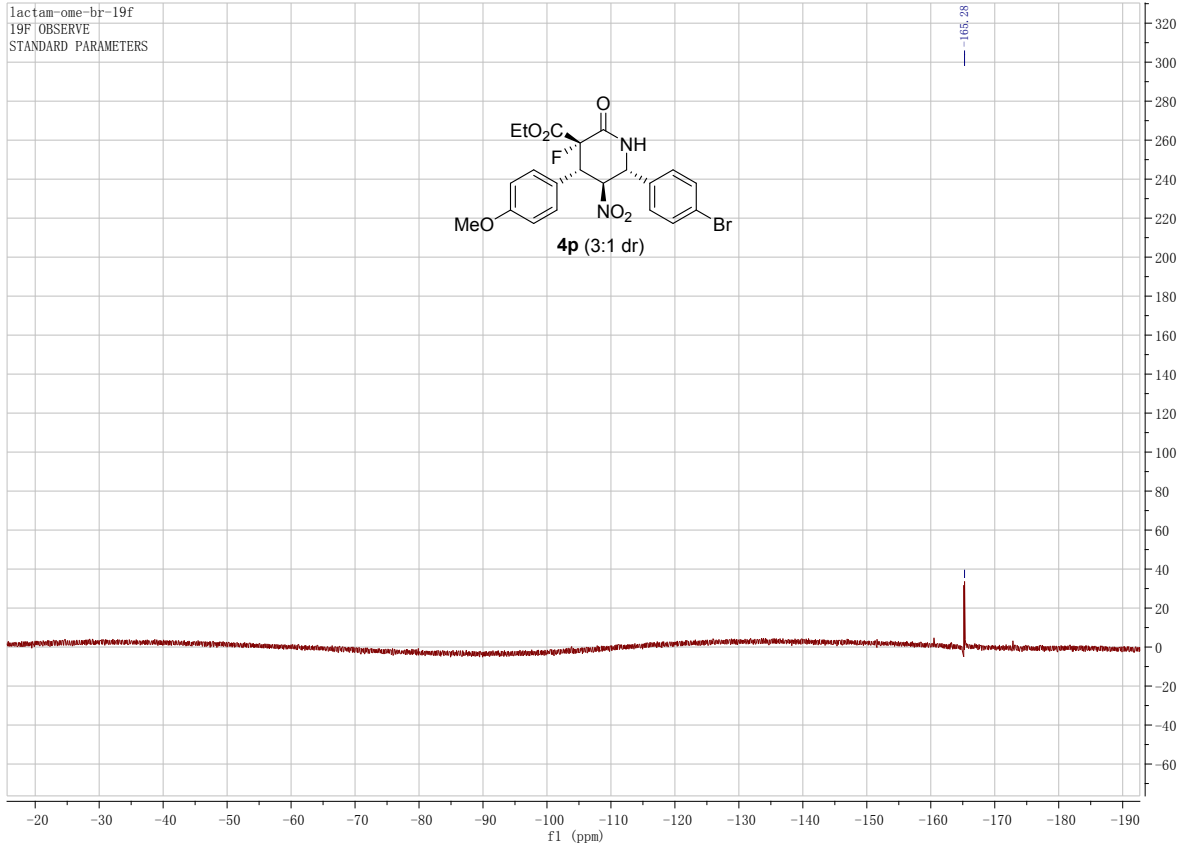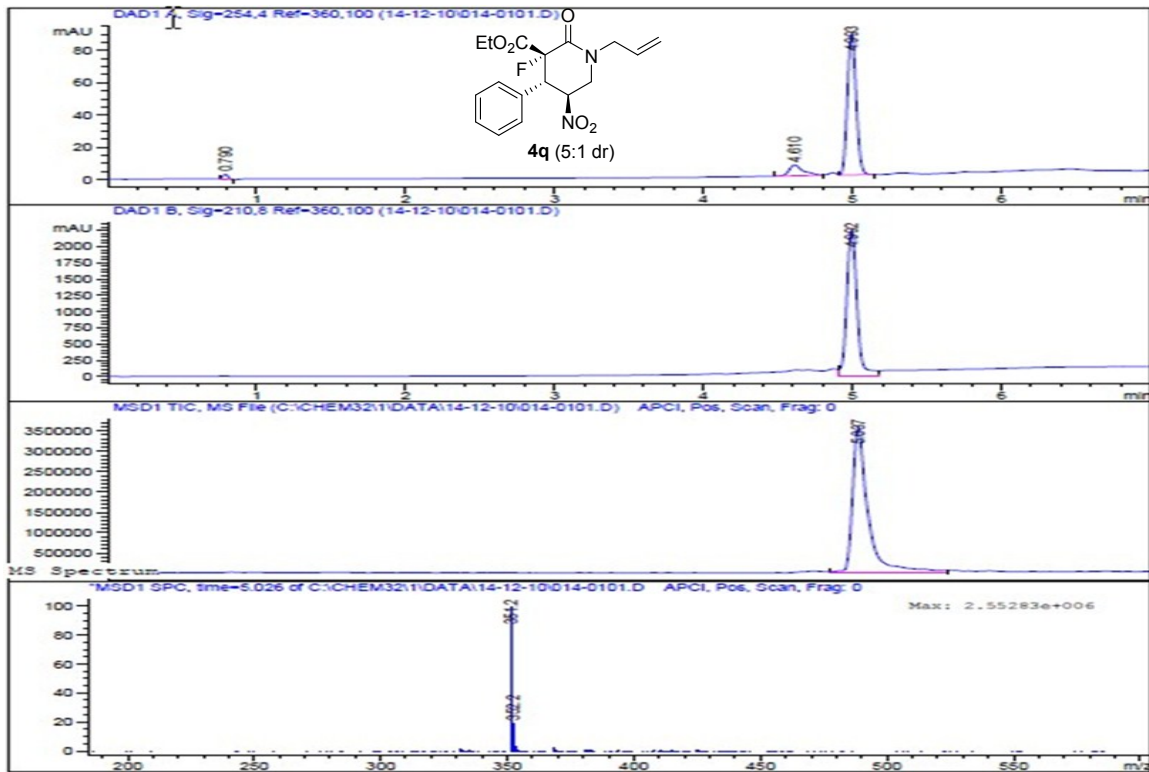

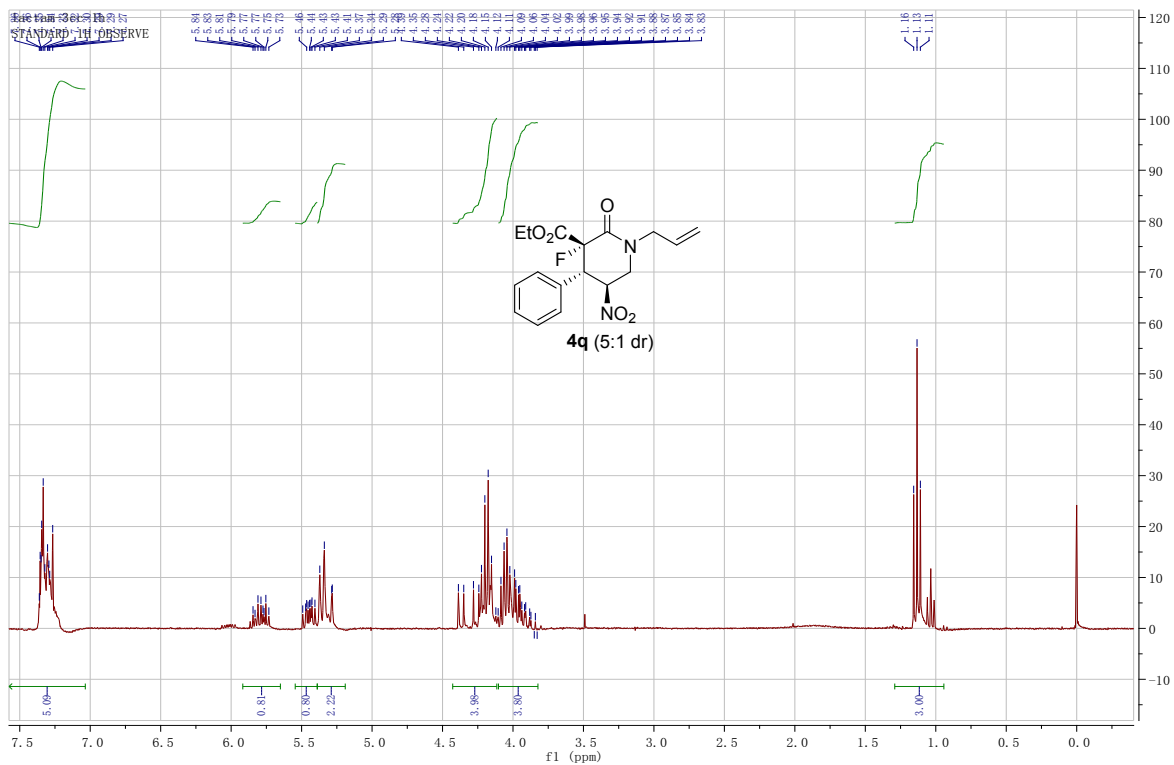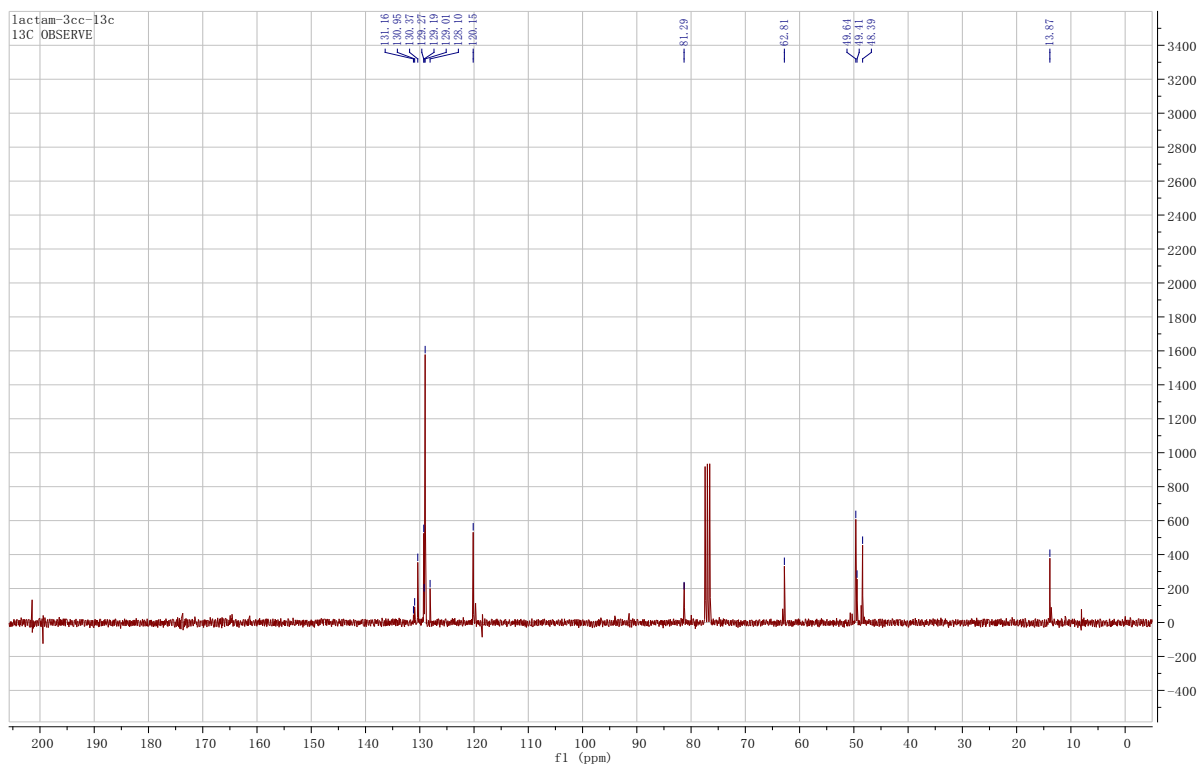

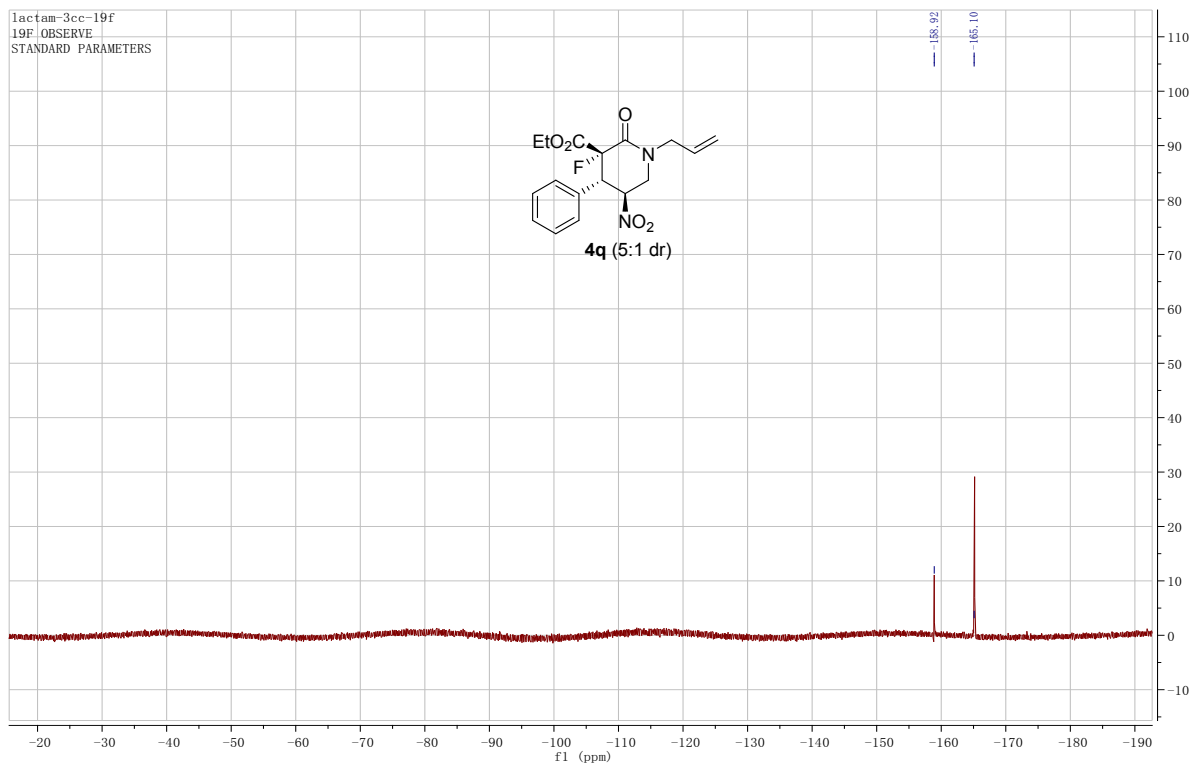

## 6. Chiral LC of Products

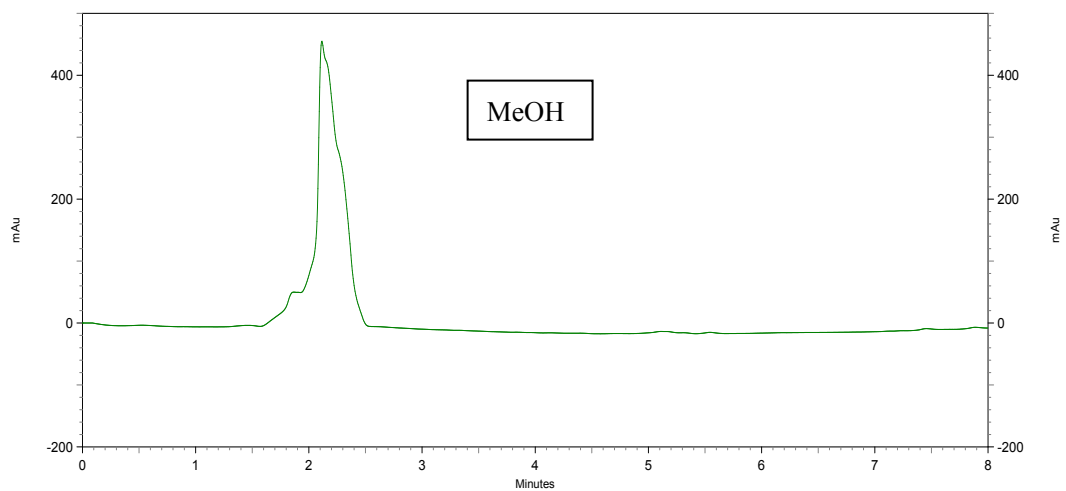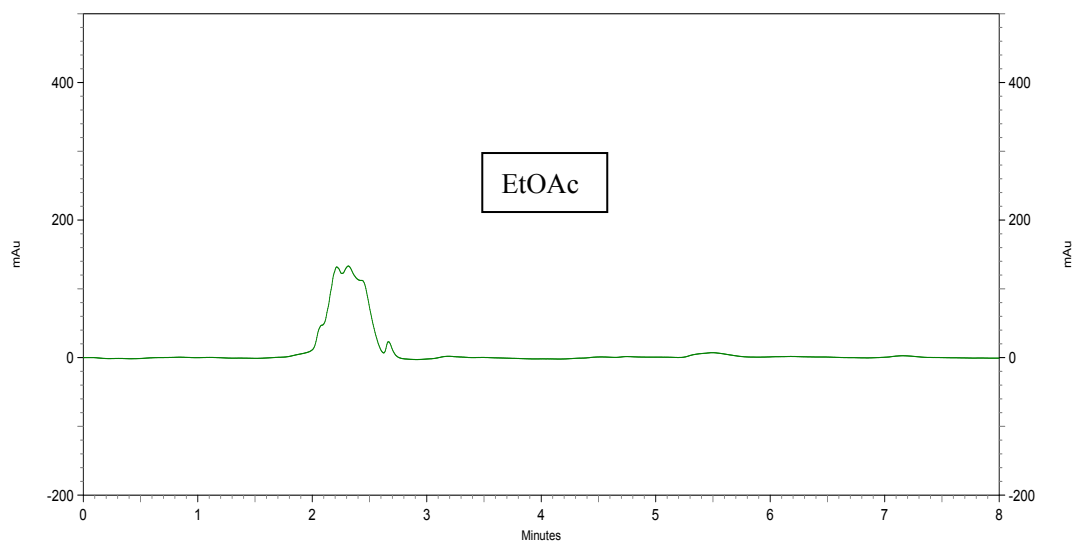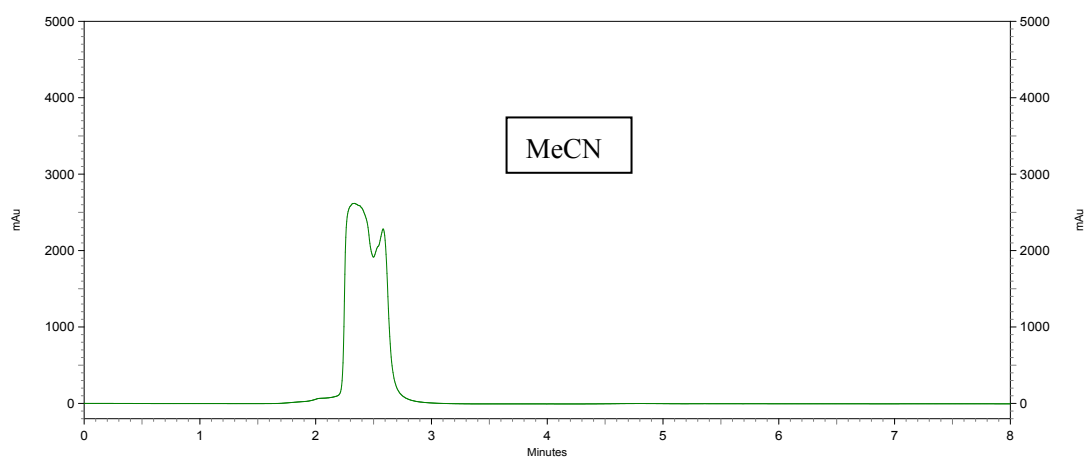



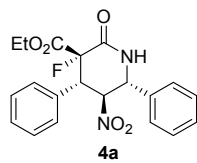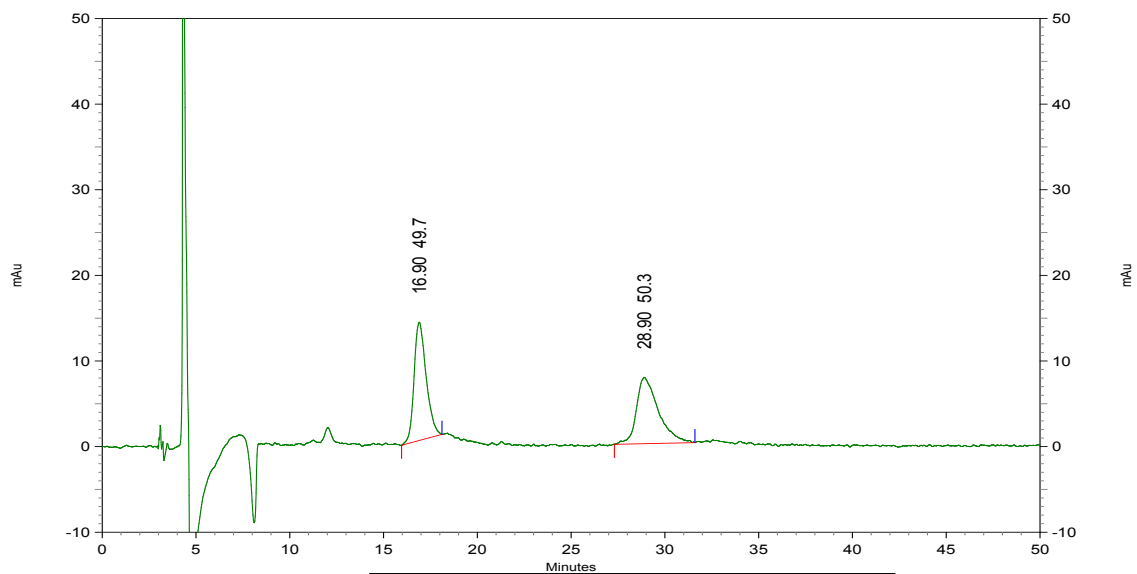

| Time   | Area % | Height % |
|--------|--------|----------|
| 16.900 | 49.66  | 64.05    |
| 28.900 | 50.34  | 35.95    |

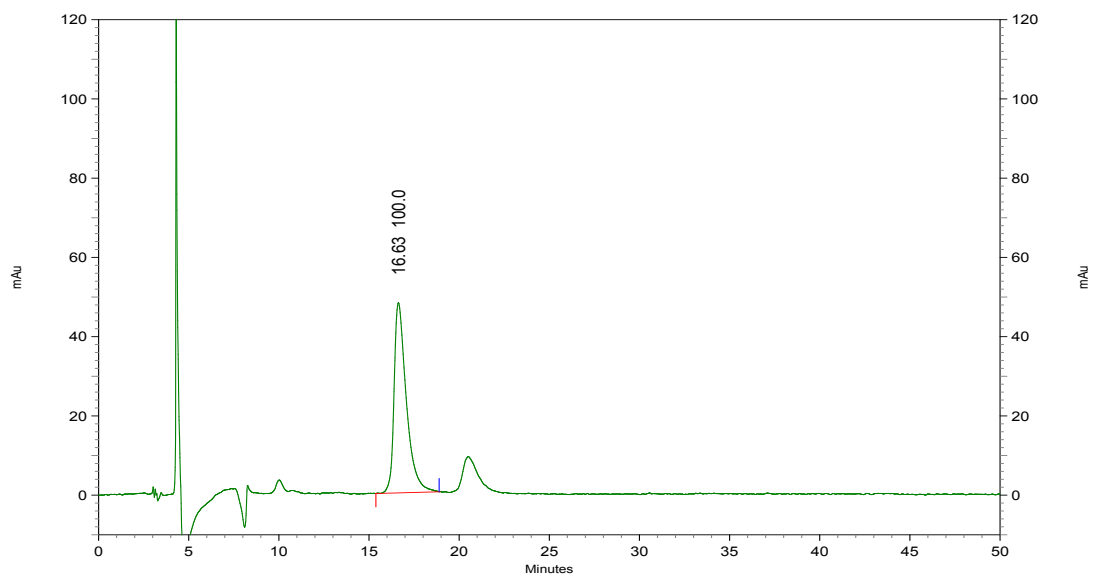

| Time   | Area % | Height % |
|--------|--------|----------|
| 16.628 | 100.00 | 100.00   |

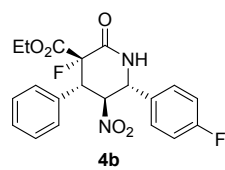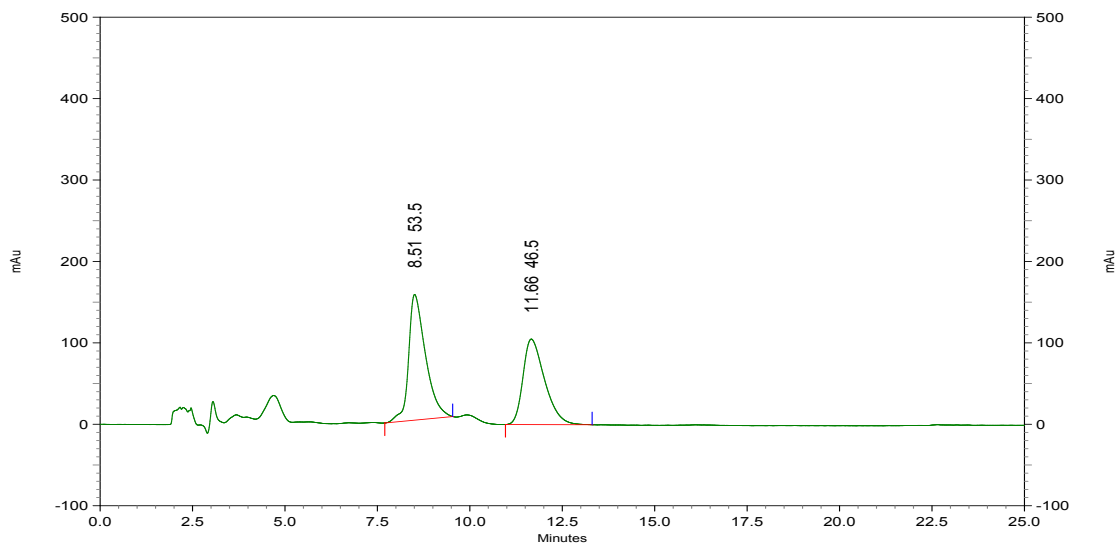

| Time   | Area % | Height % |
|--------|--------|----------|
| 8.508  | 53.52  | 59.51    |
| 11.664 | 46.48  | 40.49    |

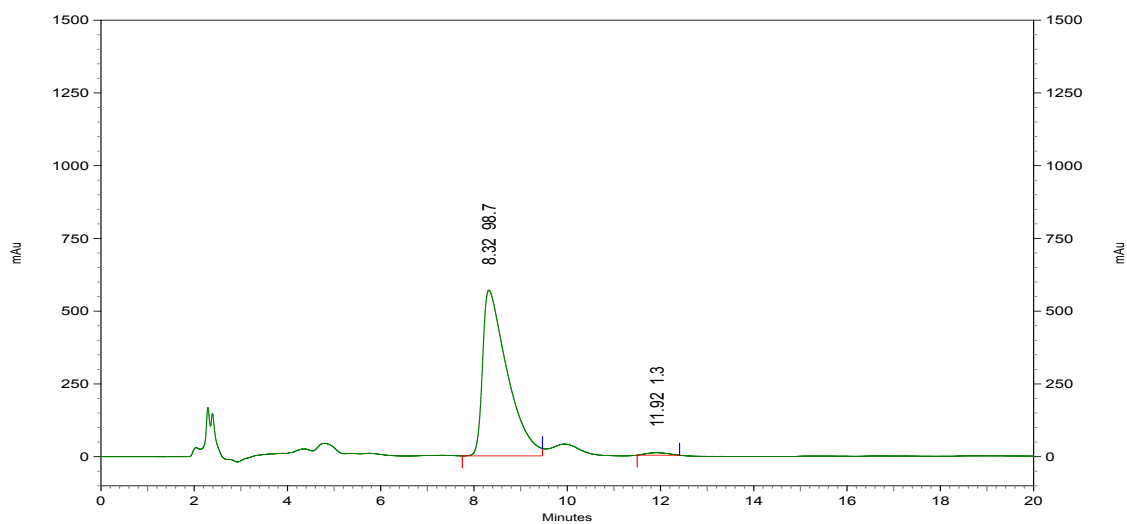

| Time   | Area % | Height % |
|--------|--------|----------|
| 8.320  | 98.70  | 98.52    |
| 11.920 | 1.30   | 1.48     |

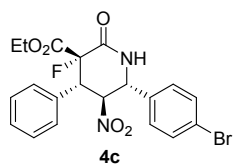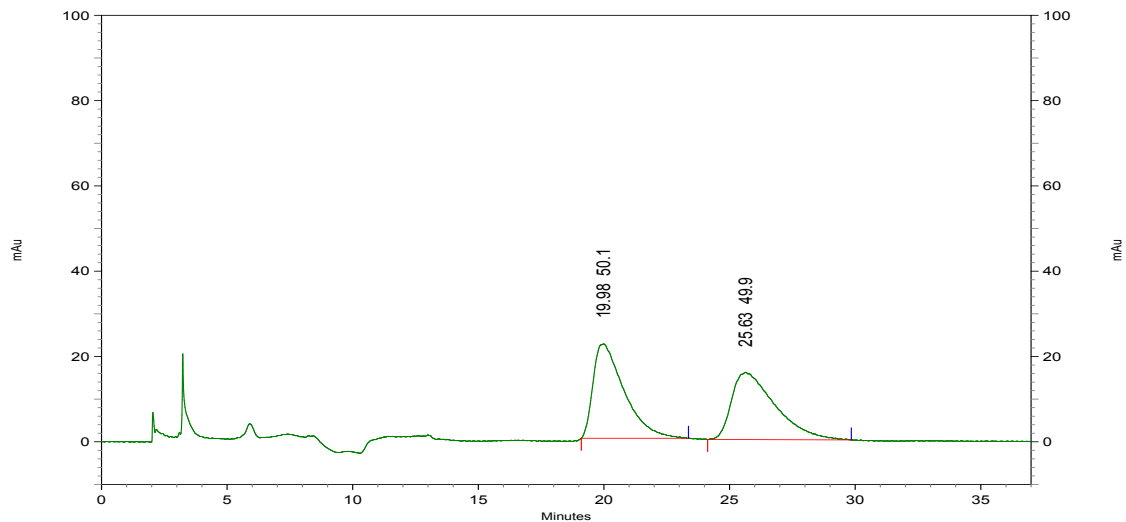

| Time   | Area % | Height % |
|--------|--------|----------|
| 19.976 | 50.11  | 58.36    |
| 25.628 | 49.89  | 41.64    |

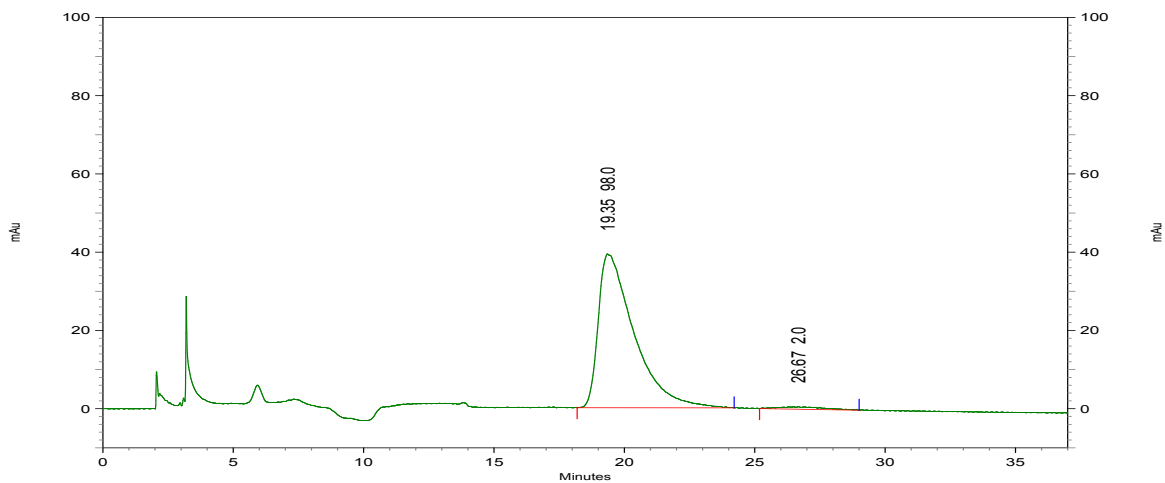

| Time   | Area % | Height % |
|--------|--------|----------|
| 19.352 | 98.02  | 98.42    |
| 26.672 | 1.98   | 1.58     |

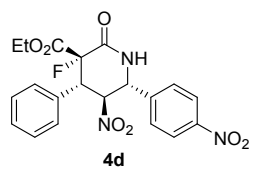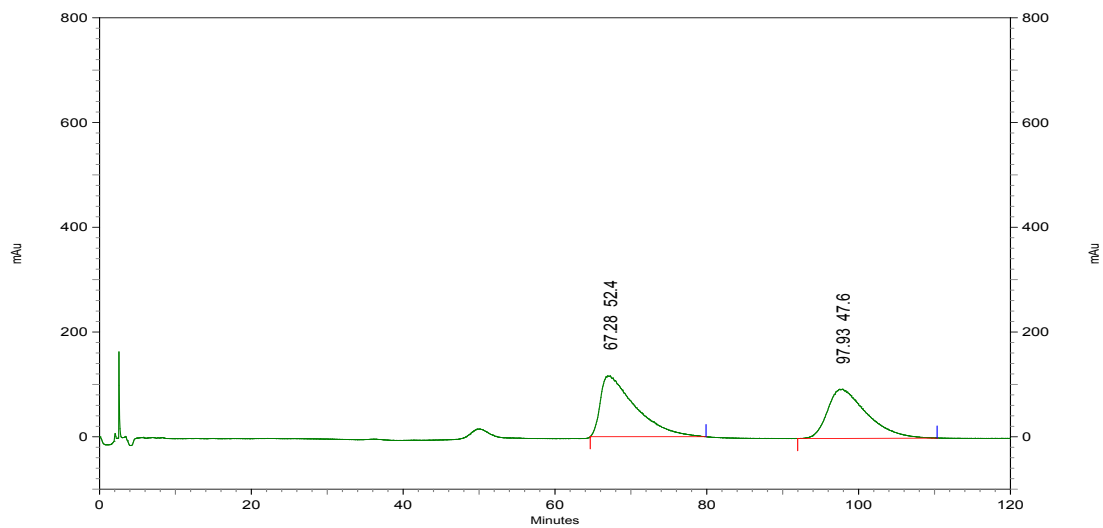

| Time   | Area % | Height % |
|--------|--------|----------|
| 67.280 | 52.40  | 55.30    |
| 97.932 | 47.60  | 44.70    |

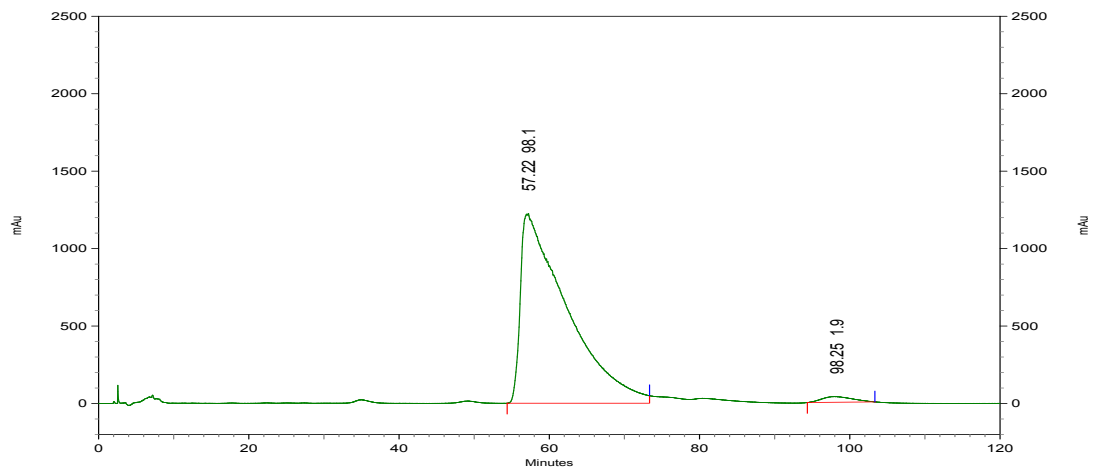

| Time   | Area % | Height % |
|--------|--------|----------|
| 57.224 | 98.08  | 97.09    |
| 98.252 | 1.92   | 2.91     |

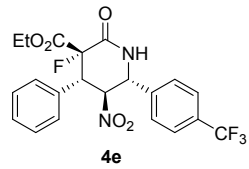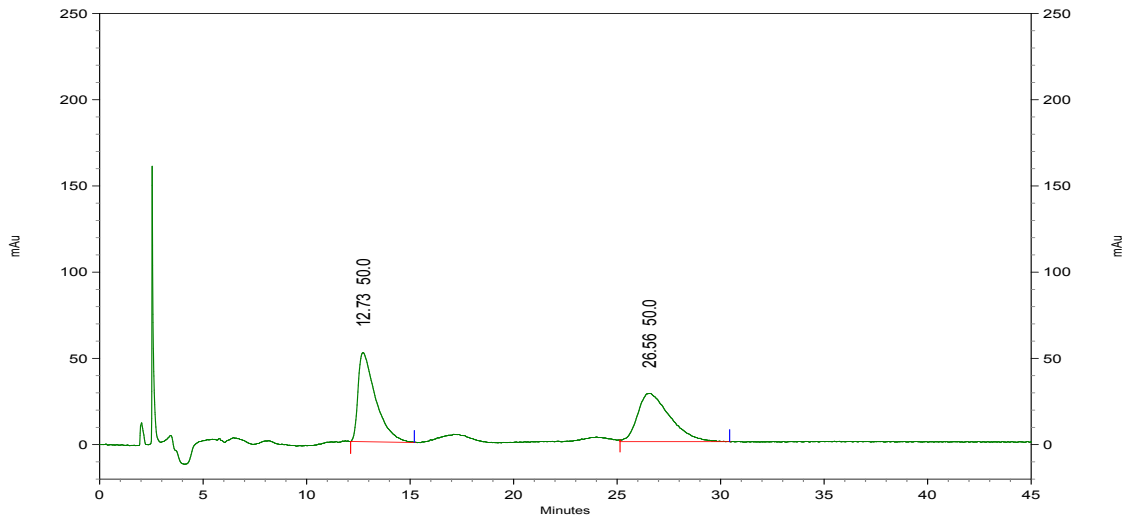

| Time   | Area % | Height % |
|--------|--------|----------|
| 12.732 | 49.78  | 56.39    |
| 26.567 | 50.22  | 43.61    |

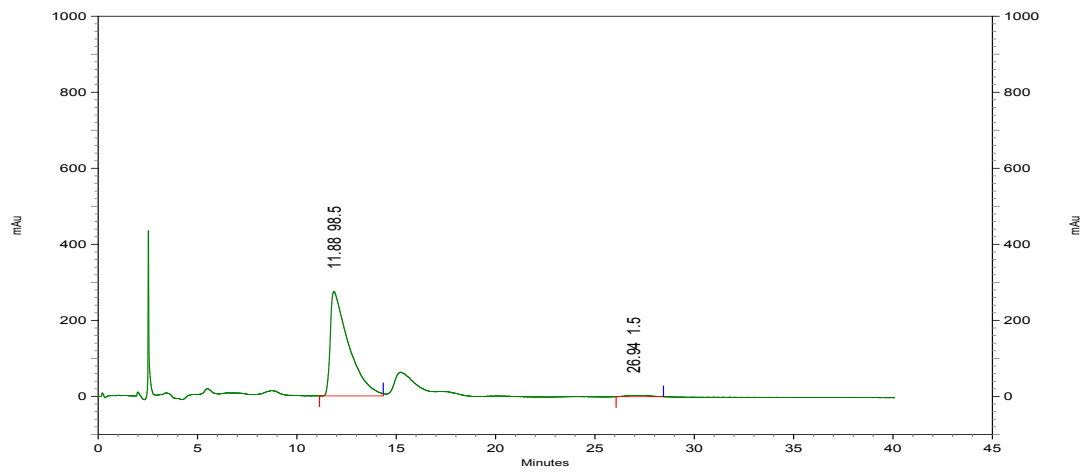

| Time   | Area % | Height % |
|--------|--------|----------|
| 11.876 | 98.54  | 98.79    |
| 26.936 | 1.46   | 1.21     |

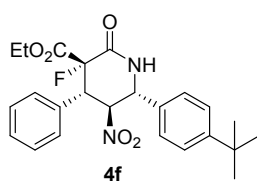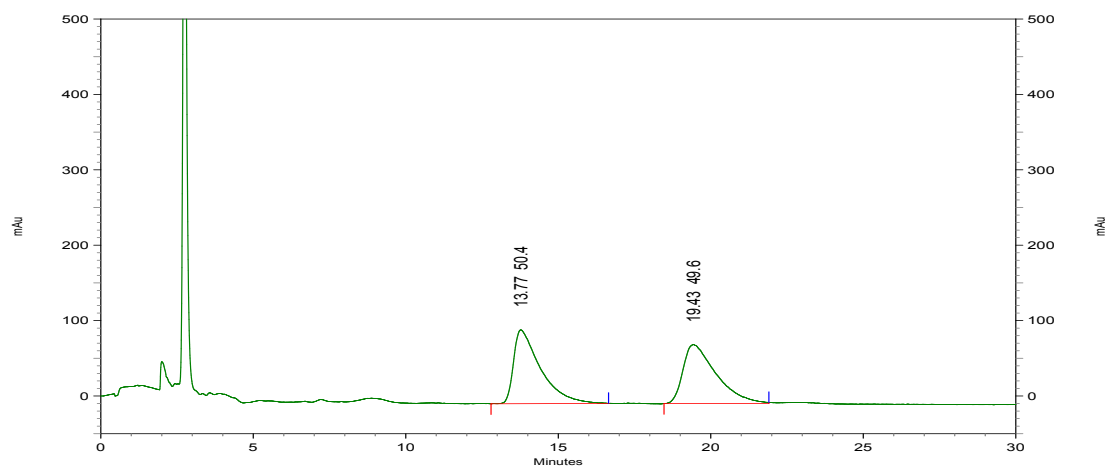

| Time   | Area % | Height % |
|--------|--------|----------|
| 13.772 | 50.35  | 55.59    |
| 19.428 | 49.65  | 44.41    |

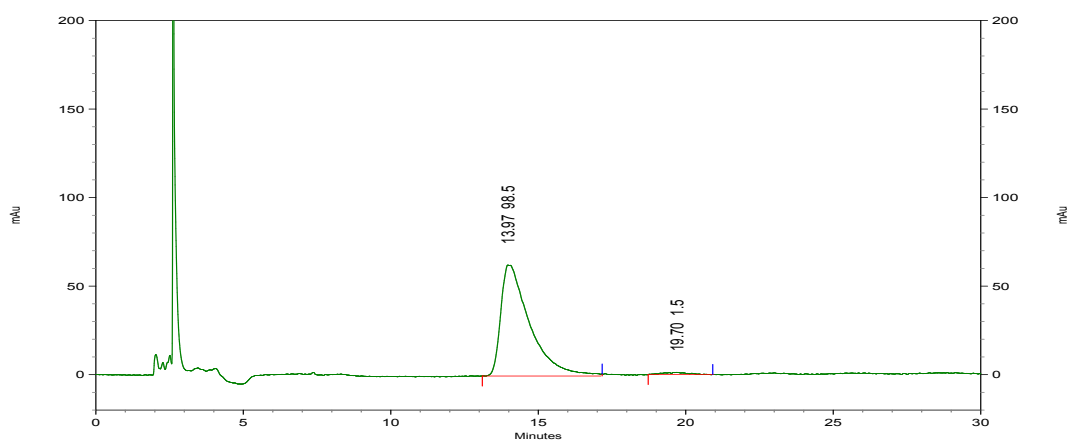

| Time   | Area % | Height % |
|--------|--------|----------|
| 13.968 | 98.51  | 98.12    |
| 19.700 | 1.49   | 1.88     |

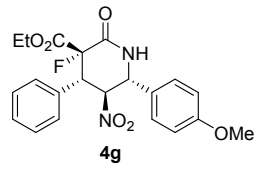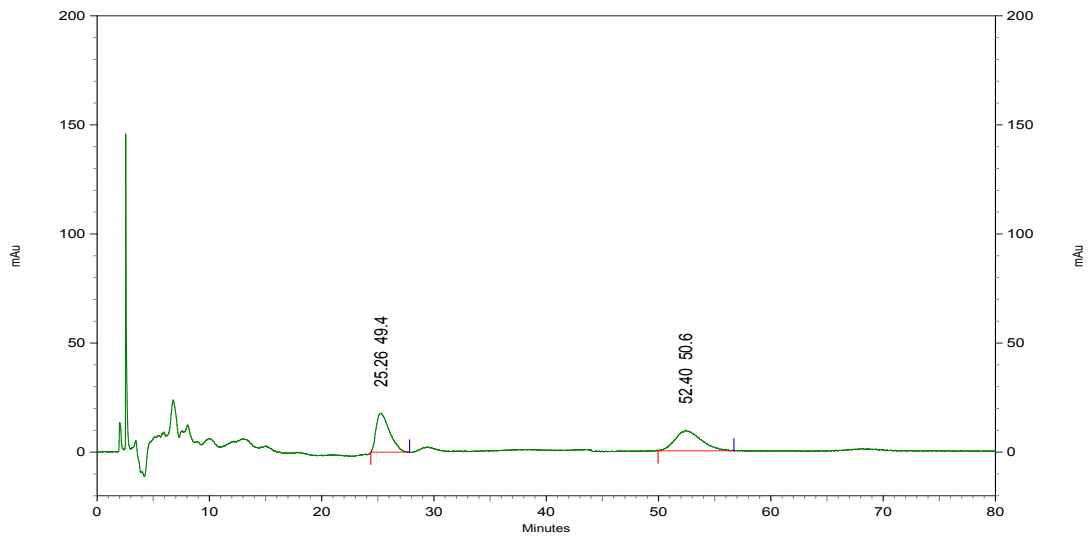

| Time   | Area % | Height % |
|--------|--------|----------|
| 25.264 | 49.41  | 65.21    |
| 52.404 | 50.59  | 34.79    |

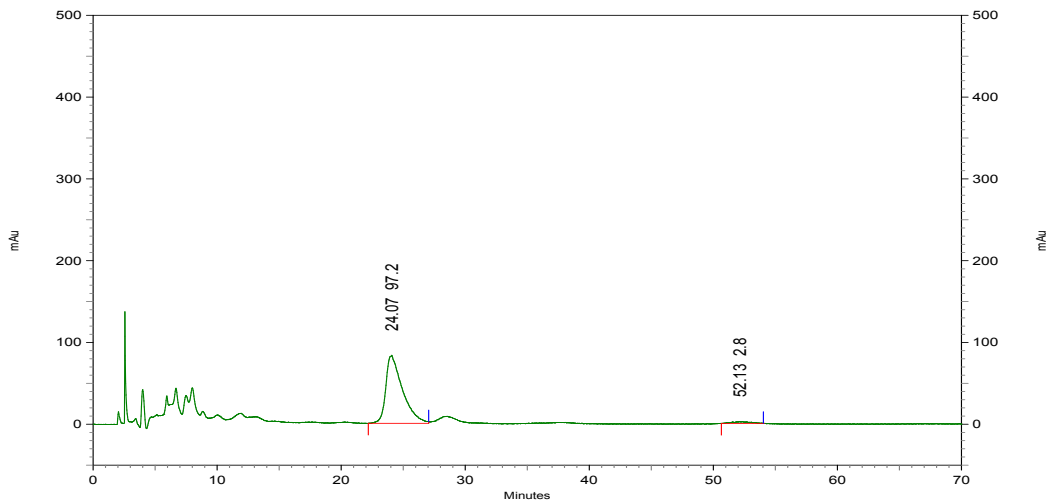

| Time   | Area % | Height % |
|--------|--------|----------|
| 24.072 | 97.19  | 97.53    |
| 52.132 | 2.81   | 2.47     |

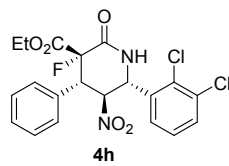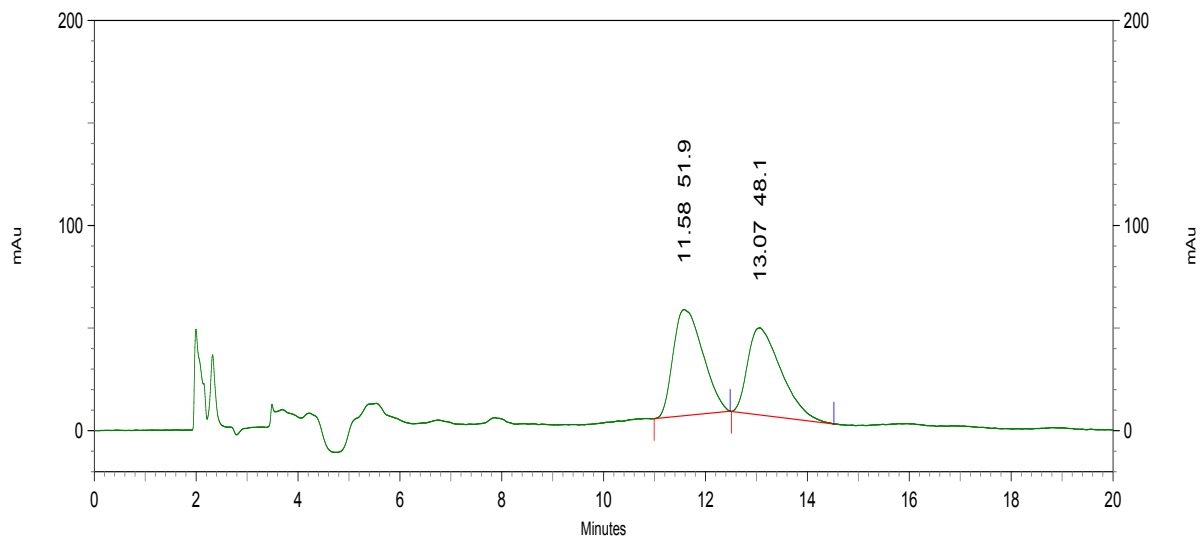

| Retention Time | Area % | Height % |
|----------------|--------|----------|
| 11.580         | 51.90  | 54.95    |
| 13.068         | 48.10  | 45.05    |

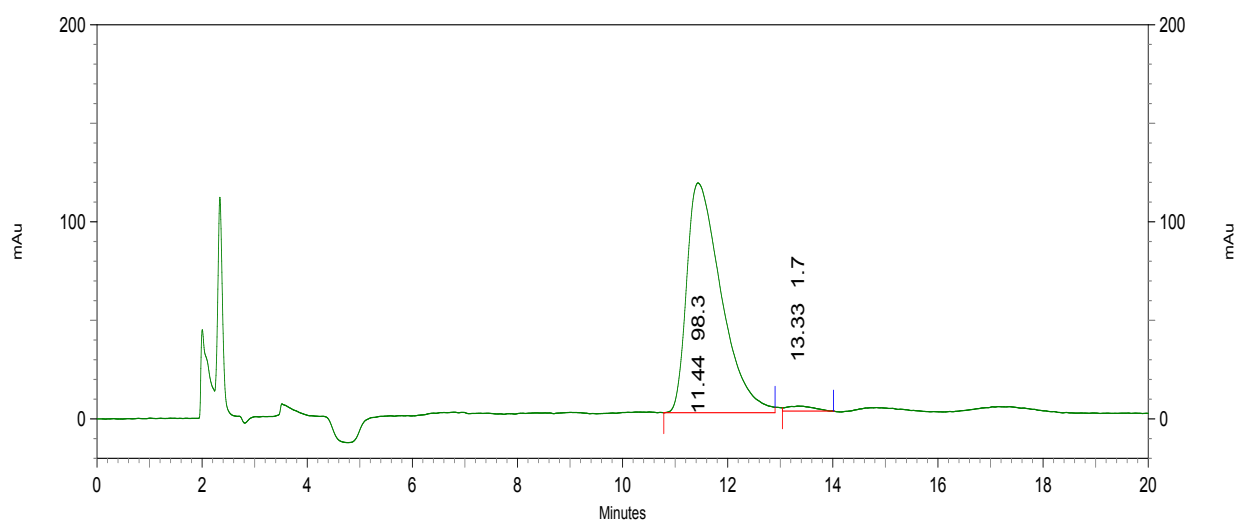

| Retention Time | Area % | Height % |
|----------------|--------|----------|
| 11.436         | 98.31  | 97.88    |
| 13.332         | 1.69   | 2.12     |



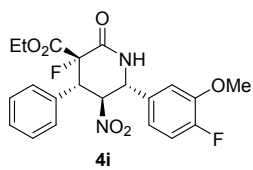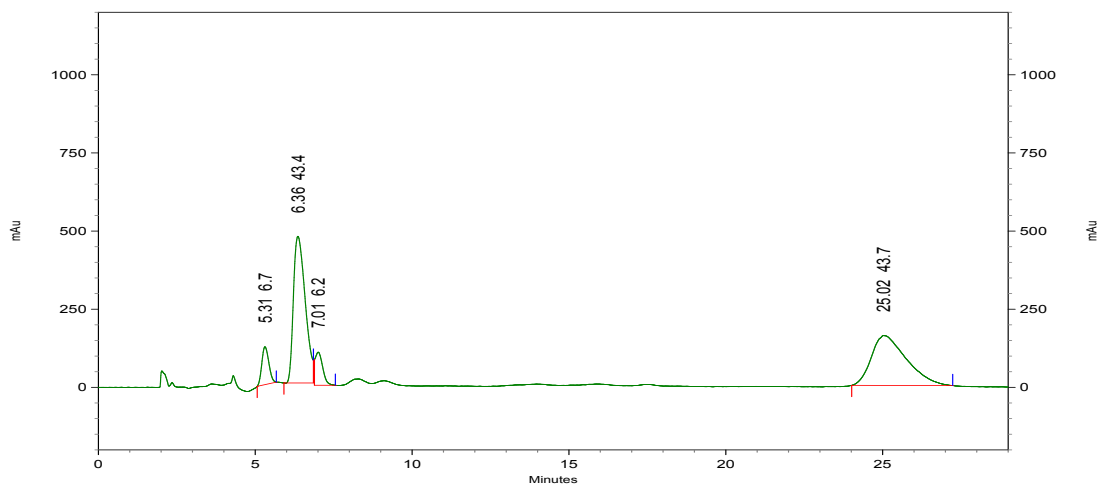

| Time   | Area % | Height % |
|--------|--------|----------|
| 5.308  | 6.66   | 14.14    |
| 6.360  | 43.43  | 54.86    |
| 7.008  | 6.18   | 12.38    |
| 25.020 | 43.74  | 18.62    |

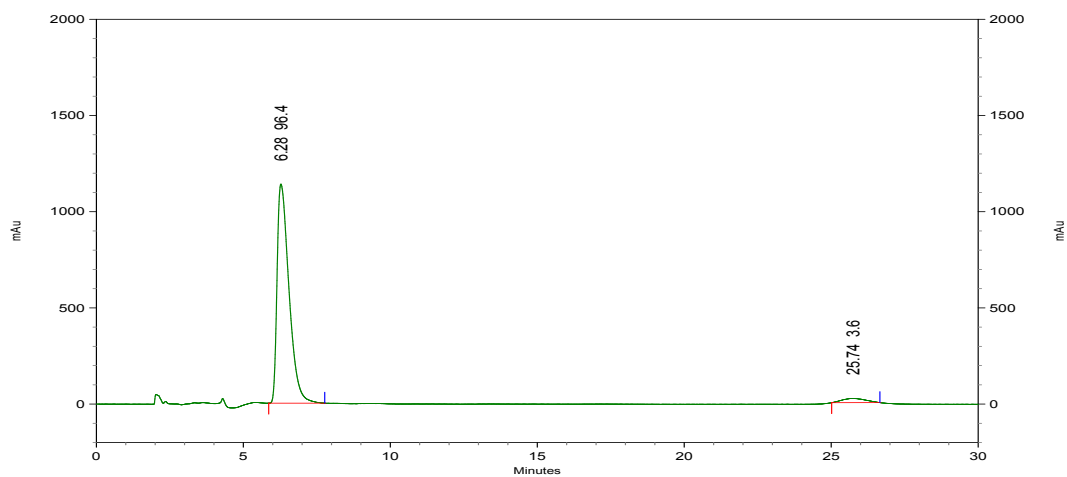

| Time   | Area % | Height % |
|--------|--------|----------|
| 6.280  | 96.38  | 98.14    |
| 25.744 | 3.62   | 1.86     |

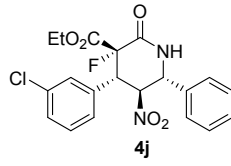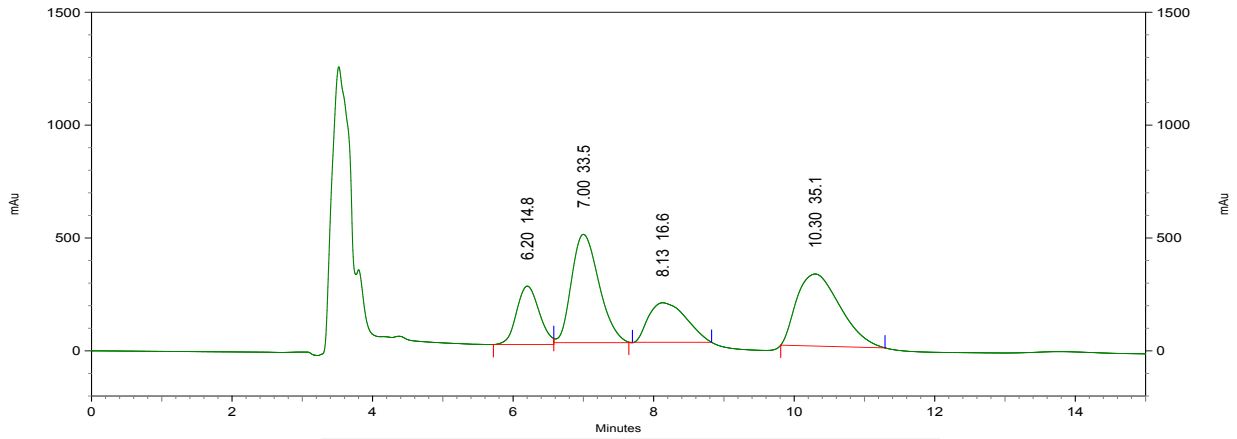

| Retention Time | Area % | Height % |
|----------------|--------|----------|
| 6.200          | 14.78  | 20.99    |
| 7.000          | 33.50  | 38.93    |
| 8.128          | 16.64  | 14.19    |
| 10.300         | 35.09  | 25.89    |

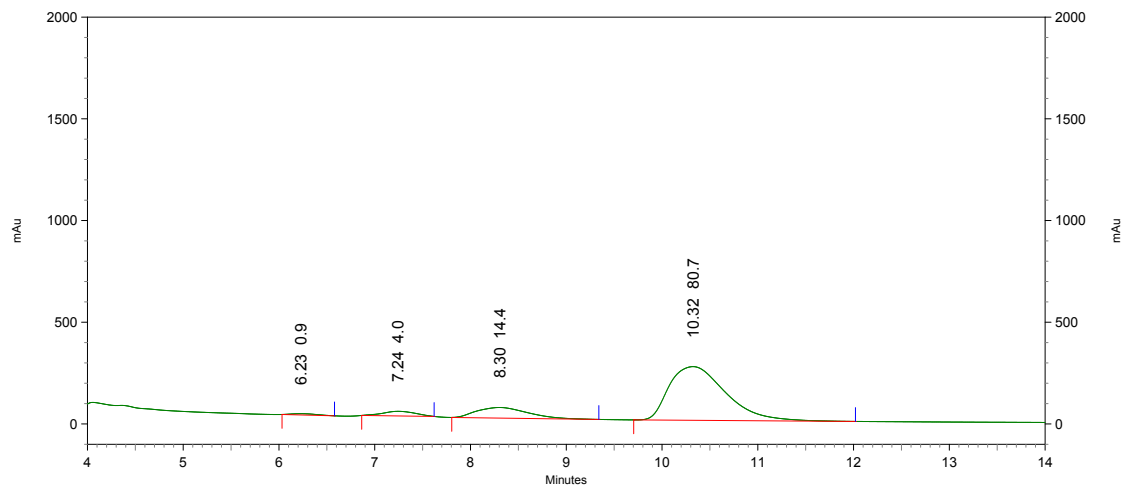

| Retention Time | Area % | Height % |
|----------------|--------|----------|
| 6.228          | 0.86   | 1.80     |
| 7.240          | 4.02   | 6.56     |
| 8.304          | 14.39  | 15.11    |
| 10.324         | 80.74  | 76.52    |

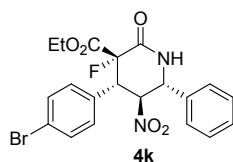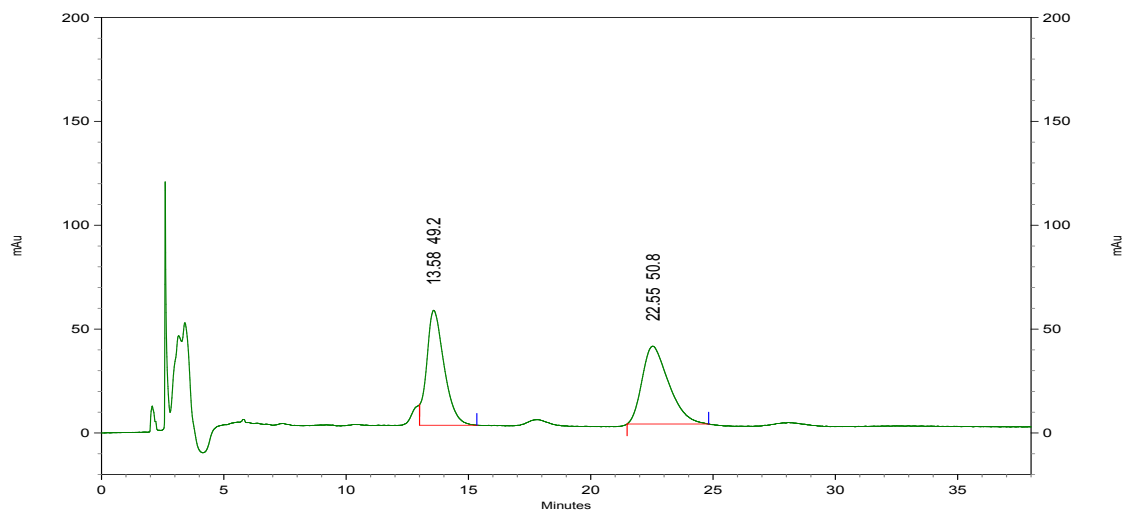

| Time   | Area % | Height % |
|--------|--------|----------|
| 13.576 | 49.18  | 59.64    |
| 22.548 | 50.82  | 40.36    |

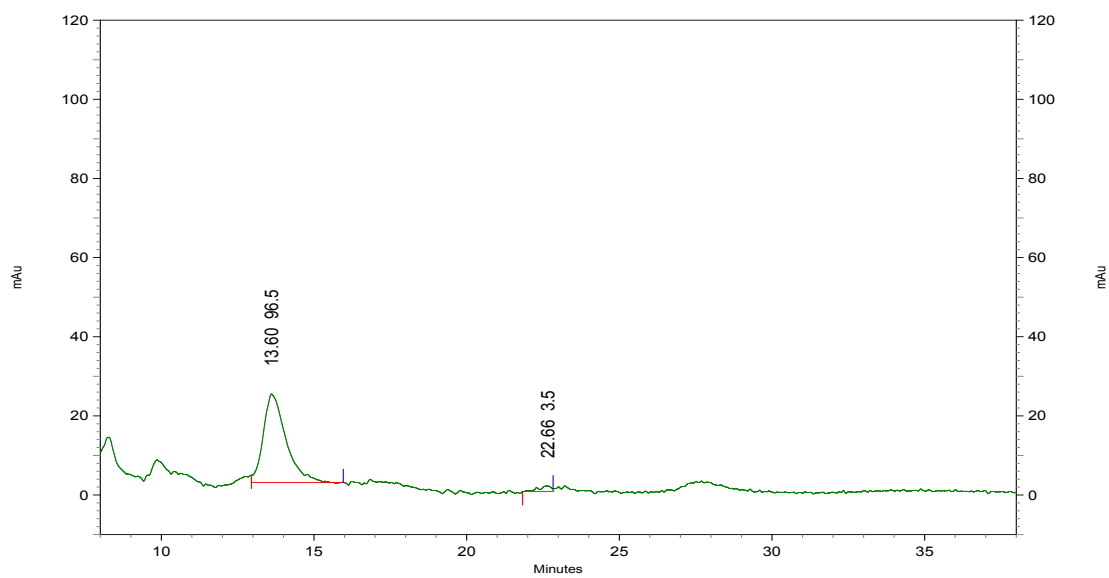

| Time   | Area % | Height % |
|--------|--------|----------|
| 13.604 | 96.55  | 94.04    |
| 22.656 | 3.45   | 5.96     |

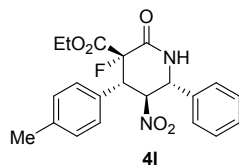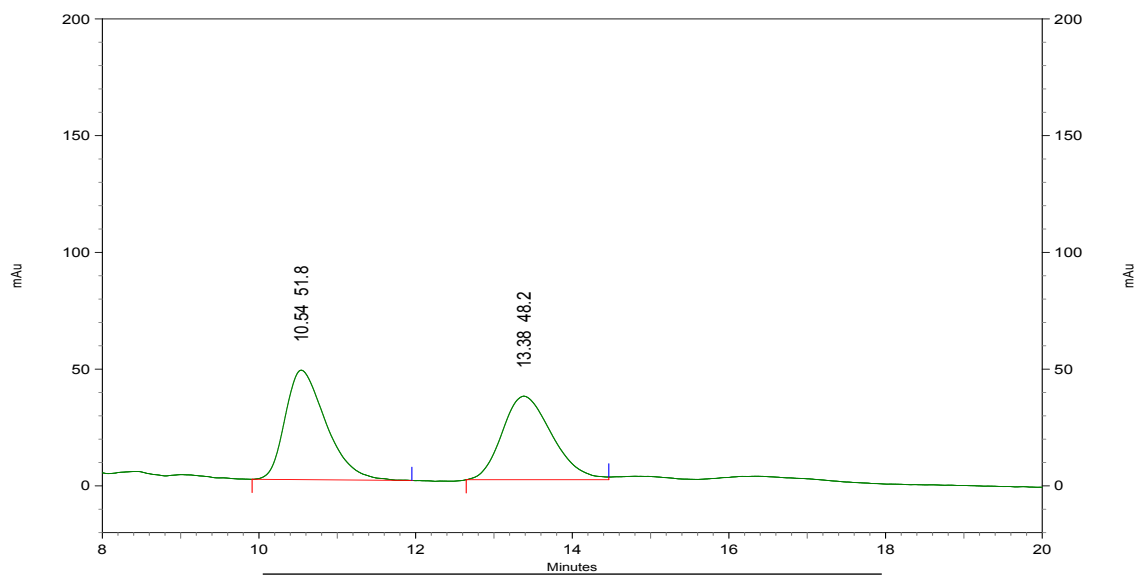

| Time   | Area % | Height % |
|--------|--------|----------|
| 10.540 | 51.76  | 56.70    |
| 13.380 | 48.24  | 43.30    |

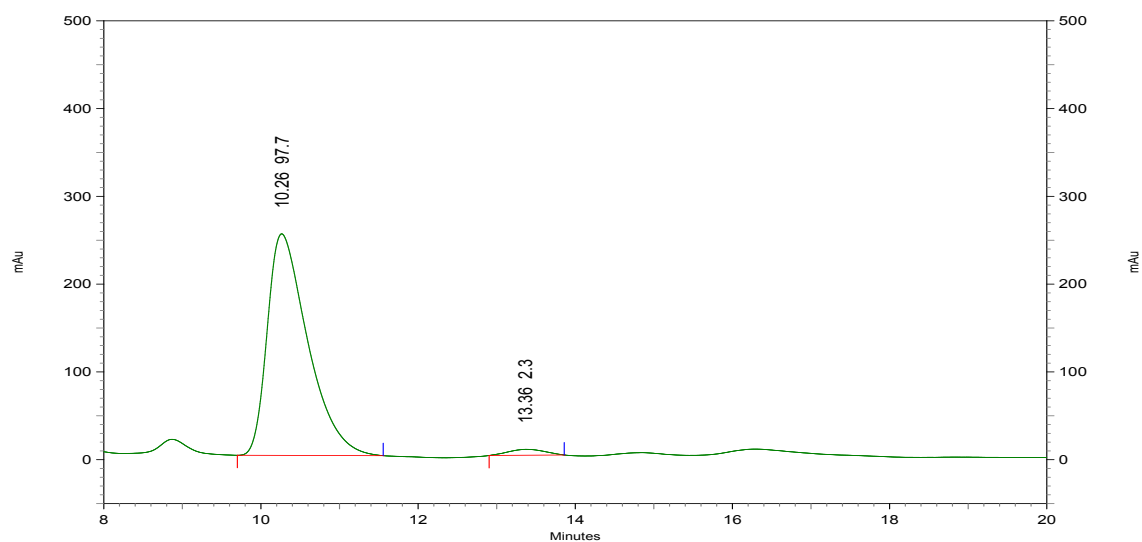

| Time   | Area % | Height % |
|--------|--------|----------|
| 10.264 | 97.68  | 97.42    |
| 13.364 | 2.32   | 2.58     |

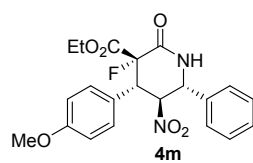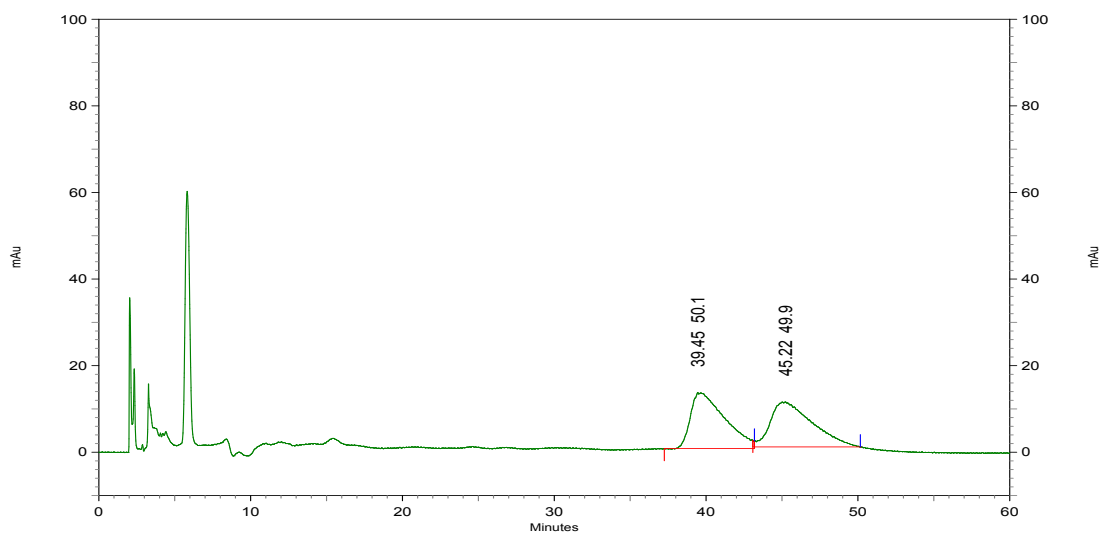

| Time   | Area % | Height % |
|--------|--------|----------|
| 39.452 | 50.13  | 55.45    |
| 45.224 | 49.87  | 44.55    |

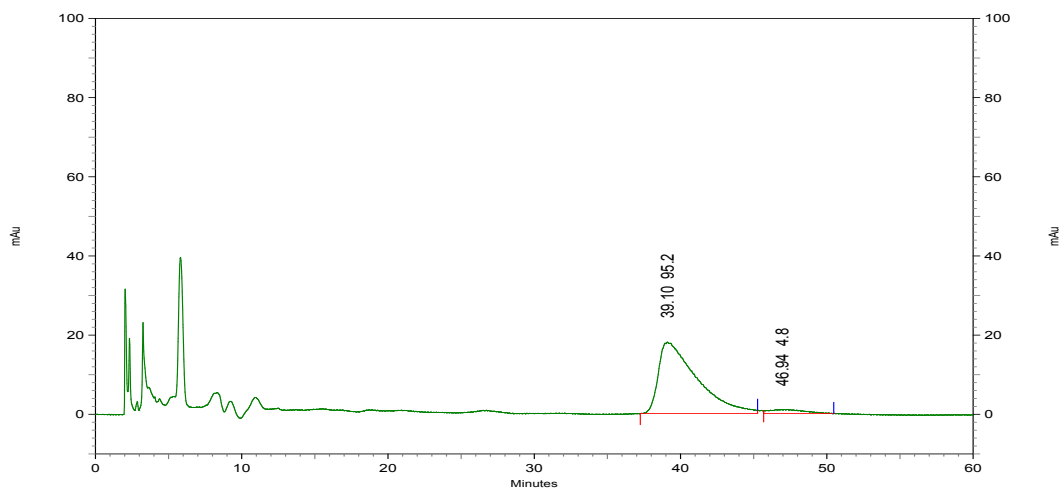

| Time   | Area % | Height % |
|--------|--------|----------|
| 39.096 | 95.20  | 94.57    |
| 46.940 | 4.80   | 5.43     |

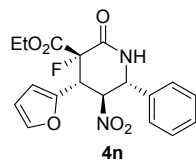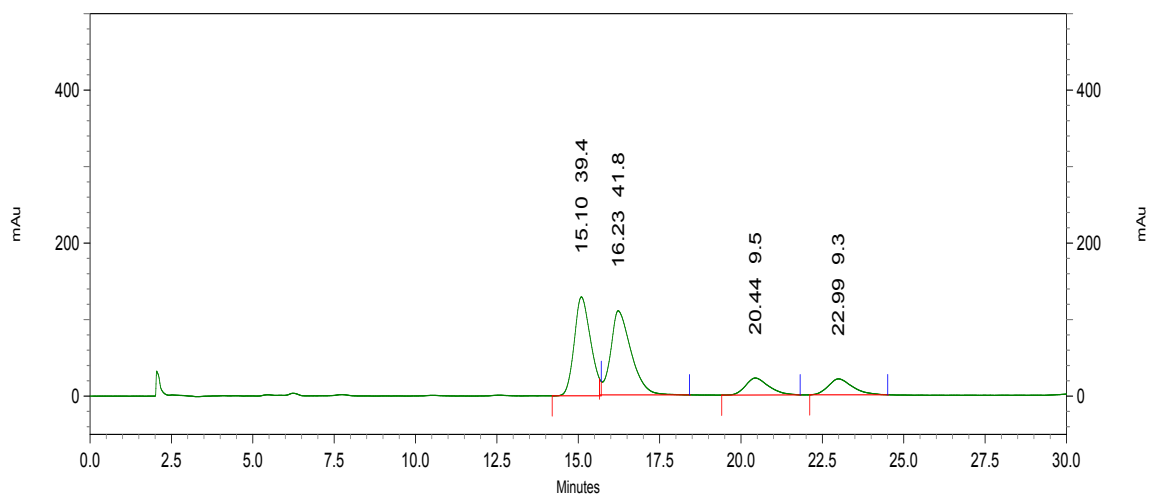

| Retention Time | Area % | Height % |
|----------------|--------|----------|
| 15.096         | 39.39  | 45.80    |
| 16.228         | 41.84  | 38.98    |
| 20.436         | 9.48   | 7.86     |
| 22.988         | 9.29   | 7.36     |

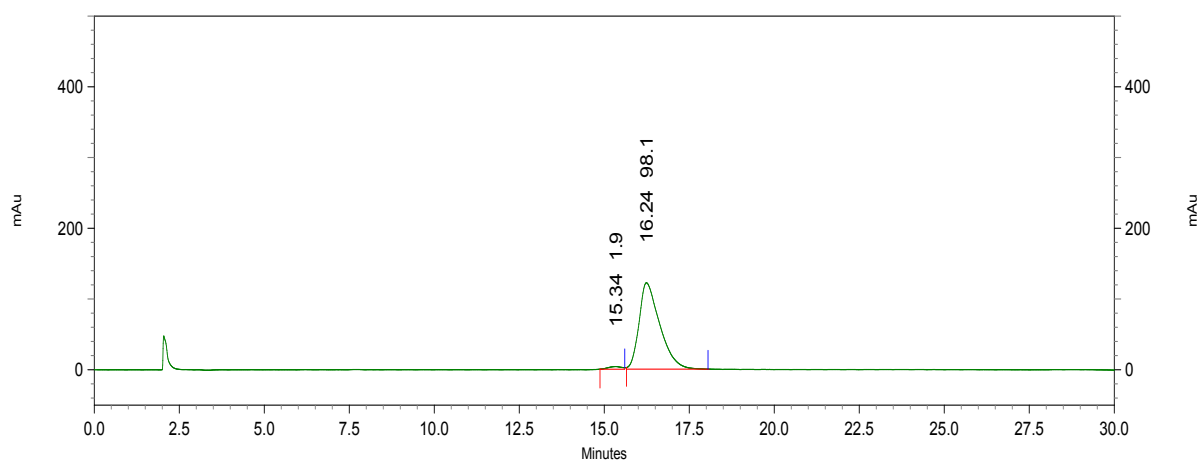

| Retention Time | Area % | Height % |
|----------------|--------|----------|
| 15.340         | 1.92   | 2.96     |
| 16.240         | 98.08  | 97.04    |

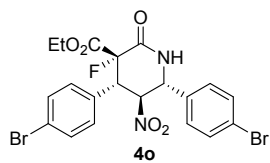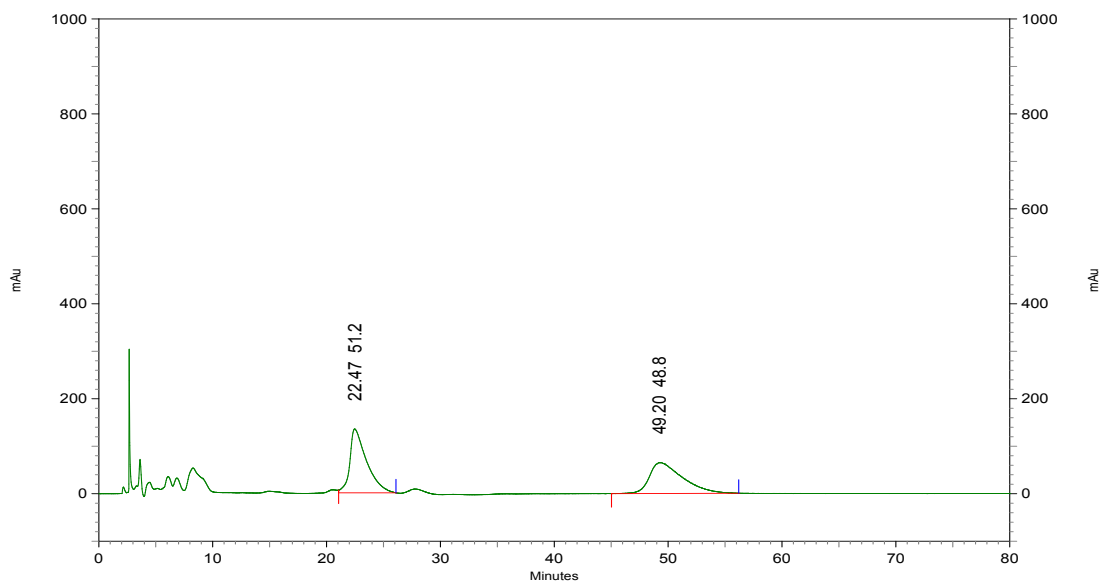

| Time   | Area % | Height % |
|--------|--------|----------|
| 22.472 | 51.23  | 67.47    |
| 49.200 | 48.77  | 32.53    |

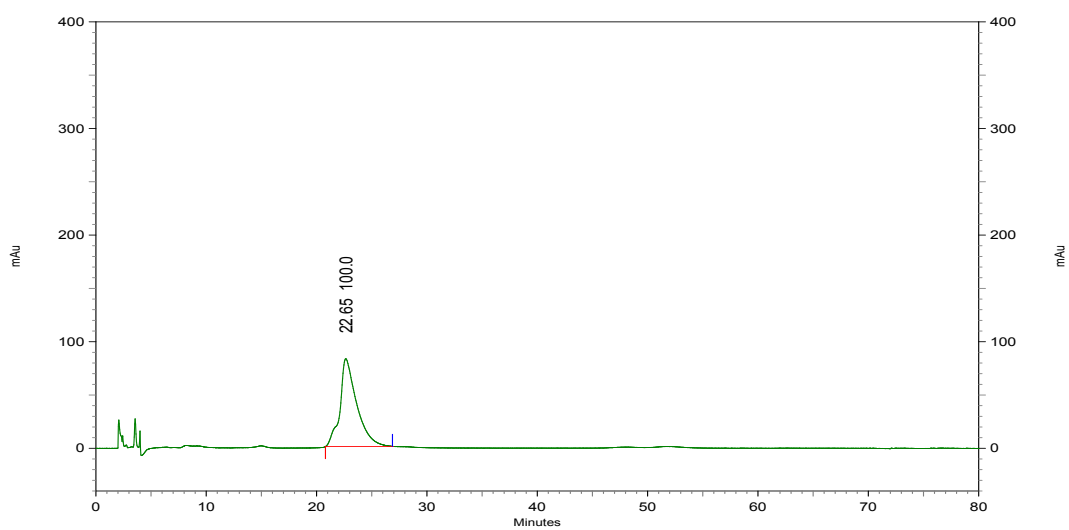

| Time   | Area % | Height % |
|--------|--------|----------|
| 22.648 | 100.00 | 100.00   |

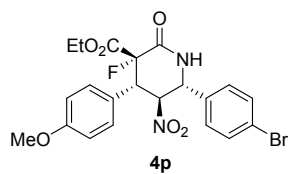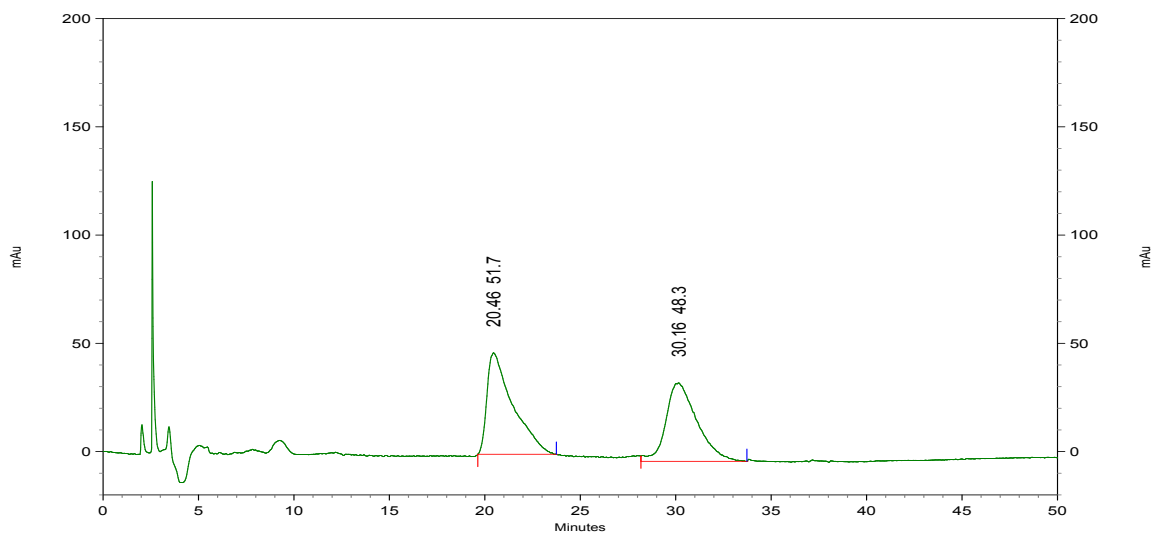

| Time   | Area % | Height % |
|--------|--------|----------|
| 20.456 | 51.66  | 56.39    |
| 30.160 | 48.34  | 43.61    |

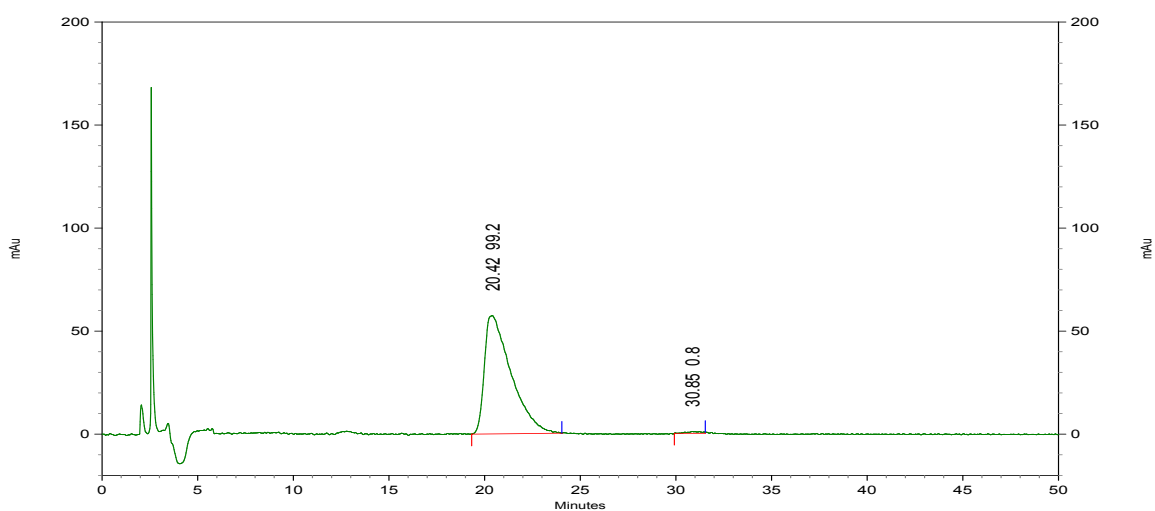

| Time   | Area % | Height % |
|--------|--------|----------|
| 20.420 | 99.17  | 98.51    |
| 30.852 | 0.83   | 1.49     |



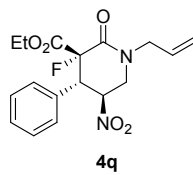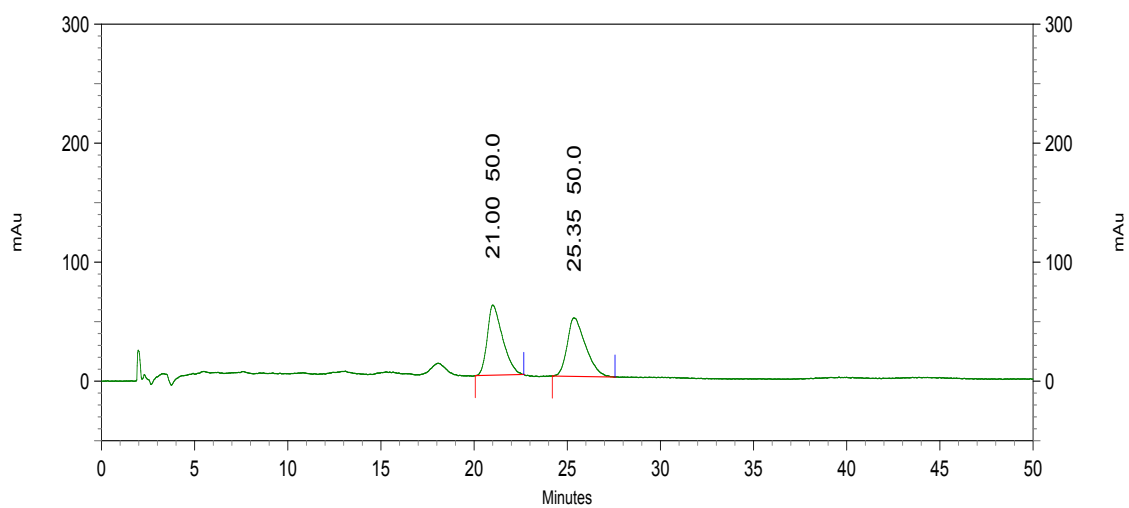

| Time   | Area % | Height % |
|--------|--------|----------|
| 21.003 | 50.00  | 55.40    |
| 25.352 | 50.00  | 44.60    |

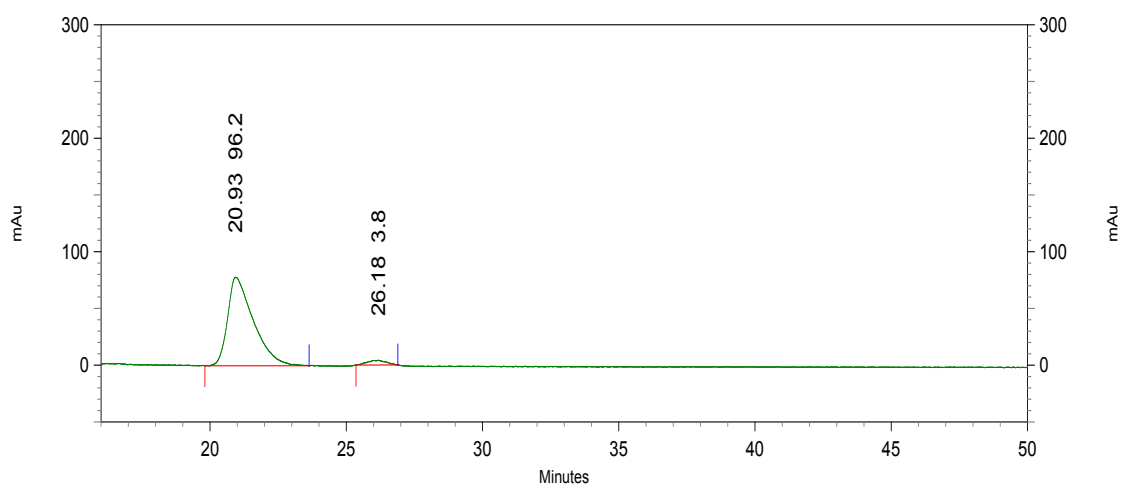

| Time   | Area % | Height % |
|--------|--------|----------|
| 20.928 | 96.23  | 94.94    |
| 26.180 | 3.77   | 5.06     |
